# Supplementary material for: Protonation-State Dependence of Hydration and Interactions in the Two Proton-Conducting Channels of Cytochrome c Oxidase
Source: MDPI journal article supplement (doi:10.3390/ijms241310464), 2023-06-21
Supplement: s1 [file s1]

Supplementary Information for  
Protonation-state dependence of hydration and interactions in  
the two proton-conducting channels in Cytochrome c Oxidase

Rene F. Gorriz, Senta Volkenandt, and Petra Imhof

# List of Figures

|     |                                                                                                                                                                                                                                                                                                                                                                                                                                                                                                                                                                                                                                                                                                                                                                                                                                                    |     |
|-----|----------------------------------------------------------------------------------------------------------------------------------------------------------------------------------------------------------------------------------------------------------------------------------------------------------------------------------------------------------------------------------------------------------------------------------------------------------------------------------------------------------------------------------------------------------------------------------------------------------------------------------------------------------------------------------------------------------------------------------------------------------------------------------------------------------------------------------------------------|-----|
| S1  | Distribution of distances between N121 and N139 in different protonation models of CcO.                                                                                                                                                                                                                                                                                                                                                                                                                                                                                                                                                                                                                                                                                                                                                            | S5  |
| S2  | Distribution of distances between E286 and N139 in different protonation models of CcO.                                                                                                                                                                                                                                                                                                                                                                                                                                                                                                                                                                                                                                                                                                                                                            | S6  |
| S3  | Distribution of distances between H26 and D132 in different protonation models of CcO.                                                                                                                                                                                                                                                                                                                                                                                                                                                                                                                                                                                                                                                                                                                                                             | S7  |
| S4  | Distribution of distances between H26 and E286 in different protonation models of CcO.                                                                                                                                                                                                                                                                                                                                                                                                                                                                                                                                                                                                                                                                                                                                                             | S8  |
| S5  | Distribution of distances between E286 and D132 in different protonation models of CcO.                                                                                                                                                                                                                                                                                                                                                                                                                                                                                                                                                                                                                                                                                                                                                            | S9  |
| S6  | Distribution of distances between Y288 and K362 in different protonation models of CcO.                                                                                                                                                                                                                                                                                                                                                                                                                                                                                                                                                                                                                                                                                                                                                            | S11 |
| S7  | Distribution of distances between E101 and Y288 in different protonation models of CcO.                                                                                                                                                                                                                                                                                                                                                                                                                                                                                                                                                                                                                                                                                                                                                            | S12 |
| S8  | Distribution of distances between E101 and K362 in different protonation models of CcO.                                                                                                                                                                                                                                                                                                                                                                                                                                                                                                                                                                                                                                                                                                                                                            | S13 |
| S9  | Distribution of distances between T359 and K362 in different protonation models of CcO.                                                                                                                                                                                                                                                                                                                                                                                                                                                                                                                                                                                                                                                                                                                                                            | S14 |
| S10 | Distribution of distances between S365 and T359 in different protonation models of CcO.                                                                                                                                                                                                                                                                                                                                                                                                                                                                                                                                                                                                                                                                                                                                                            | S15 |
| S11 | Distribution of distances between S365 and K362 in different protonation models of CcO.                                                                                                                                                                                                                                                                                                                                                                                                                                                                                                                                                                                                                                                                                                                                                            | S16 |
| S12 | Distribution of distances between S365 and Y288 in different protonation models of CcO.                                                                                                                                                                                                                                                                                                                                                                                                                                                                                                                                                                                                                                                                                                                                                            | S17 |
| S13 | Distribution of distances between H96 and Y288 in different protonation models of CcO.                                                                                                                                                                                                                                                                                                                                                                                                                                                                                                                                                                                                                                                                                                                                                             | S18 |
| S14 | Distribution of distances between H96 and K362 in different protonation models of CcO.                                                                                                                                                                                                                                                                                                                                                                                                                                                                                                                                                                                                                                                                                                                                                             | S19 |
| S15 | Distribution of distances between H96 and E101 in different protonation models of CcO.                                                                                                                                                                                                                                                                                                                                                                                                                                                                                                                                                                                                                                                                                                                                                             | S20 |
| S16 | Distribution of distances between E101 and T359 in different protonation models of CcO.                                                                                                                                                                                                                                                                                                                                                                                                                                                                                                                                                                                                                                                                                                                                                            | S21 |
| S17 | Distribution of distances between E286 and Y288 in different protonation models of CcO.                                                                                                                                                                                                                                                                                                                                                                                                                                                                                                                                                                                                                                                                                                                                                            | S23 |
| S18 | Distribution of distances between E286 and K362 in different protonation models of CcO.                                                                                                                                                                                                                                                                                                                                                                                                                                                                                                                                                                                                                                                                                                                                                            | S24 |
| S19 | Distribution of distances between D132 and K362 in different protonation models of CcO.                                                                                                                                                                                                                                                                                                                                                                                                                                                                                                                                                                                                                                                                                                                                                            | S25 |
| S20 | Distribution of distances between N139 and K362 in different protonation models of CcO.                                                                                                                                                                                                                                                                                                                                                                                                                                                                                                                                                                                                                                                                                                                                                            | S26 |
| S21 | Distribution of distances between D132 and E101 in different protonation models of CcO.                                                                                                                                                                                                                                                                                                                                                                                                                                                                                                                                                                                                                                                                                                                                                            | S27 |
| S22 | Distribution of distances between M316 and K362 in different protonation models of CcO.                                                                                                                                                                                                                                                                                                                                                                                                                                                                                                                                                                                                                                                                                                                                                            | S30 |
| S23 | Distribution of distances between P358 and A319 in different protonation models of CcO.                                                                                                                                                                                                                                                                                                                                                                                                                                                                                                                                                                                                                                                                                                                                                            | S31 |
| S24 | Distribution of distances between P315 and S365 in different protonation models of CcO.                                                                                                                                                                                                                                                                                                                                                                                                                                                                                                                                                                                                                                                                                                                                                            | S32 |
| S25 | Distribution of distances between P315 and E101 in different protonation models of CcO.                                                                                                                                                                                                                                                                                                                                                                                                                                                                                                                                                                                                                                                                                                                                                            | S33 |
| S26 | Distribution of side chain dihedral angles of H26 in different protonation models of CcO.                                                                                                                                                                                                                                                                                                                                                                                                                                                                                                                                                                                                                                                                                                                                                          | S34 |
| S27 | Distribution of side chain dihedral angles of N121 in different protonation models of CcO.                                                                                                                                                                                                                                                                                                                                                                                                                                                                                                                                                                                                                                                                                                                                                         | S35 |
| S28 | Distribution of side chain dihedral angles of N139 in different protonation models of CcO.                                                                                                                                                                                                                                                                                                                                                                                                                                                                                                                                                                                                                                                                                                                                                         | S36 |
| S29 | Distribution of side chain dihedral angles of D132 in different protonation models of CcO.                                                                                                                                                                                                                                                                                                                                                                                                                                                                                                                                                                                                                                                                                                                                                         | S37 |
| S30 | Distribution of side chain dihedral angles of E286 in different protonation models of CcO.                                                                                                                                                                                                                                                                                                                                                                                                                                                                                                                                                                                                                                                                                                                                                         | S38 |
| S31 | Distribution of side chain dihedral angles of T359 in different protonation models of CcO.                                                                                                                                                                                                                                                                                                                                                                                                                                                                                                                                                                                                                                                                                                                                                         | S39 |
| S32 | Distribution of side chain dihedral angles $\chi_1$ (top) and $\chi_2$ (bottom) of K362 in the most important protonation models of CcO.                                                                                                                                                                                                                                                                                                                                                                                                                                                                                                                                                                                                                                                                                                           | S40 |
| S33 | Distribution of side chain dihedral angles $\chi_3$ (top) and $\chi_4$ (bottom) of K362 in the most important protonation models of CcO.                                                                                                                                                                                                                                                                                                                                                                                                                                                                                                                                                                                                                                                                                                           | S41 |
| S34 | Distribution of side chain dihedral angles of K362 in different protonation models of CcO.                                                                                                                                                                                                                                                                                                                                                                                                                                                                                                                                                                                                                                                                                                                                                         | S42 |
| S35 | Distribution of side chain dihedral angle $\chi_1$ of E101 in the most important protonation models of CcO.                                                                                                                                                                                                                                                                                                                                                                                                                                                                                                                                                                                                                                                                                                                                        | S43 |
| S36 | Distribution of side chain dihedral angle $\chi_2$ of E101 in the most important protonation models of CcO.                                                                                                                                                                                                                                                                                                                                                                                                                                                                                                                                                                                                                                                                                                                                        | S44 |
| S37 | Distribution of side chain dihedral angle $\chi_3$ of E101 in the most important protonation models of CcO.                                                                                                                                                                                                                                                                                                                                                                                                                                                                                                                                                                                                                                                                                                                                        | S45 |
| S38 | Distribution of side chain dihedral angles of E101 in different protonation models of CcO.                                                                                                                                                                                                                                                                                                                                                                                                                                                                                                                                                                                                                                                                                                                                                         | S46 |
| S39 | Distribution of side chain dihedral angles of S365 in different protonation models of CcO.                                                                                                                                                                                                                                                                                                                                                                                                                                                                                                                                                                                                                                                                                                                                                         | S47 |
| S40 | Distribution of side chain dihedral angles of H96 in different protonation models of CcO.                                                                                                                                                                                                                                                                                                                                                                                                                                                                                                                                                                                                                                                                                                                                                          | S48 |
| S41 | Average distances between the $\text{H}_3\text{O}^+$ ion and important residues in different protonation models of CcO.                                                                                                                                                                                                                                                                                                                                                                                                                                                                                                                                                                                                                                                                                                                            | S49 |
| S42 | Projection of water occupancy in the D-channel of CcO with most important protonation states. The symbols mark the average height of protein residues H26 (dark blue rectangle  ) , N121 (cyan arrow-left  ) , D132 (lime diamond  ) , N139 (purple arrow-right  ) , and E286 (orange star  ) . Residues with an excess proton are marked by a grey circle around the symbols representing the respective residues. | S57 |

|     |                                                                                                                                                                                                                                                                                                                                                                                                                                                                                                                                                                              |     |
|-----|------------------------------------------------------------------------------------------------------------------------------------------------------------------------------------------------------------------------------------------------------------------------------------------------------------------------------------------------------------------------------------------------------------------------------------------------------------------------------------------------------------------------------------------------------------------------------|-----|
| S43 | Projection of water occupancy in the K-channel of CcO with most important protonation states. The symbols mark the average height of protein residues H96 (light blue triangle ▲), E101 (red square ■), S365 (brown triangle-right ►), K362 (blue cross ✕), T359 (green triangle-left ◄), Y288 (magenta triangle-down ▼). Residues with an excess proton are marked by a grey circle around the symbols representing the respective residues. . . . .                                                                                                                        | S63 |
| S44 | Mobility of water molecules in the D-channel, discretised by cylinder height for different protonation models of the D-channel of CcO. The symbols mark the average height of protein residues H26 (navy rectangle ▢), N121 (cyan arrow-left ⇐), D132 (lime diamond ◆), N139 (purple arrow-right ⇨), and E286 (orange star ★). Residues with an excess proton are marked by a grey circle around the symbols representing the respective residues. . . . .                                                                                                                   | S64 |
| S45 | Mobility of water molecules in the K-channel, discretised by cylinder height for different protonation models of the K-channel of CcO. The symbols mark the average height of protein residues H96 (light blue triangle ▲), E101 (red square ■), S365 (brown triangle-right ►), K362 (blue cross ✕), T359 (green triangle-left ◄), Y288 (magenta triangle-down ▼), and position of the $\text{H}_3\text{O}^+$ ion (yellow circle ●), if present. Residues with an excess proton are marked by a grey circle around the symbols representing the respective residues. . . . . | S65 |
| S46 | Hydrogen bonded connections between important protein residues (represented by coloured nodes: H26 dark blue, N121 cyan, D132 lime, N139 purple, E286 orange) in the D-channel of CcO. Residues with an excess proton are marked by a grey circle around the symbols representing the respective residues. The thickness of the lines indicates the probability of a hydrogen-bonded connection. Only connections with at least 1% occurrence are shown for clarity. . . . .                                                                                                 | S71 |
| S47 | Hydrogen bonded connections between important protein residues (represented by coloured nodes: Y288 pink, T359 dark green, K362 blue, S365 brown, H96 light blue, E101 red) in the K-channel of CcO. Residues with an excess proton are marked by a grey circle around the symbols representing the respective residues. The thickness of the lines indicates the probability of a hydrogen-bonded connection. Only connections with at least 1% occurrence are shown for clarity. . . . .                                                                                   | S73 |

## List of Tables

|     |                                                                                                                                                                                                                                                                                                                                                                |     |
|-----|----------------------------------------------------------------------------------------------------------------------------------------------------------------------------------------------------------------------------------------------------------------------------------------------------------------------------------------------------------------|-----|
| S1  | Average distances (in Å) between important residues in the D-channel. . . . .                                                                                                                                                                                                                                                                                  | S4  |
| S2  | Average distances(in Å) between important residues in the K-channel. . . . .                                                                                                                                                                                                                                                                                   | S10 |
| S3  | Average distances(in Å) between important residues in D- and K-channel. . . . .                                                                                                                                                                                                                                                                                | S22 |
| S4  | Average distances(in Å) between important residues in the K-channel and the $\text{H}_3\text{O}^+$ ion (H3). . . . .                                                                                                                                                                                                                                           | S28 |
| S5  | Average distances(in Å) defining the width of the K-channel . . . . .                                                                                                                                                                                                                                                                                          | S29 |
| S6  | Average amount of water molecules in the D-channel cylinder . . . . .                                                                                                                                                                                                                                                                                          | S50 |
| S7  | Average amount of water molecules in the K-channel cylinder . . . . .                                                                                                                                                                                                                                                                                          | S50 |
| S8  | Average volume (in $\text{nm}^3$ ) of polyhedron in D-Channel . . . . .                                                                                                                                                                                                                                                                                        | S50 |
| S9  | Average volume (in $\text{nm}^3$ ) of polyhedron in K-Channel . . . . .                                                                                                                                                                                                                                                                                        | S51 |
| S10 | Average number of hydrogen bonds between protein residues and water in the D-channel.                                                                                                                                                                                                                                                                          | S66 |
| S11 | Average number of hydrogen bonds between protein residues and water in the K-channel.                                                                                                                                                                                                                                                                          | S67 |
| S12 | Life times (in ps) of hydrogen bonds between protein residues in the D-channel and water molecules inside the channel. N/A indicates life times that are computed to be longer than the simulation time or have an error that is larger than the computed average value. . . . .                                                                               | S68 |
| S13 | Life times (in ps) of hydrogen bonds between protein residues in the K-channel and water molecules inside the channel. Note that the $\text{H}_3\text{O}^+$ ion is not included as a water molecule. N/A indicates life times that are computed to be longer than the simulation time or have an error that is larger than the computed average value. . . . . | S69 |

# 1 Conformational analysis

Table S1: Average distances (in Å) between important residues in the D-channel.

| Model | E286-D132  | E286-N139  | H26-D132  | H26-E286   | N121-N139 |
|-------|------------|------------|-----------|------------|-----------|
| 0000f | 29.0 ± 0.2 | 20.6 ± 0.4 | 5.3 ± 0.1 | 25.9 ± 0.3 | 5.1 ± 0.6 |
| 0000e | 28.6 ± 0.0 | 19.8 ± 0.7 | 5.4 ± 0.2 | 25.4 ± 0.3 | 4.8 ± 1.2 |
| 0000d | 28.8 ± 0.1 | 20.5 ± 0.1 | 5.5 ± 0.1 | 25.5 ± 0.2 | 5.2 ± 0.4 |
| 0000c | 28.8 ± 0.2 | 20.5 ± 0.3 | 5.6 ± 0.2 | 25.4 ± 0.0 | 5.6 ± 0.5 |
| 0000b | 28.8 ± 0.1 | 20.2 ± 0.3 | 5.6 ± 0.1 | 25.4 ± 0.3 | 5.5 ± 0.4 |
| 0000a | 28.8 ± 0.1 | 20.2 ± 0.5 | 5.5 ± 0.1 | 25.5 ± 0.1 | 5.2 ± 0.7 |
| 0011  | 28.5 ± 0.4 | 19.9 ± 0.7 | 5.5 ± 0.1 | 25.4 ± 0.3 | 5.2 ± 0.6 |
| 0010  | 28.6 ± 0.3 | 19.7 ± 0.8 | 5.4 ± 0.2 | 25.6 ± 0.2 | 4.4 ± 0.8 |
| 0001  | 28.6 ± 0.2 | 19.7 ± 0.8 | 5.4 ± 0.2 | 25.3 ± 0.1 | 4.8 ± 1.2 |
| 0000  | 28.7 ± 0.1 | 20.3 ± 0.3 | 5.6 ± 0.2 | 25.5 ± 0.1 | 5.3 ± 0.6 |
| <hr/> |            |            |           |            |           |
| 0100f | 29.6 ± 0.9 | 19.5 ± 0.8 | 5.2 ± 0.0 | 27.1 ± 1.0 | 3.9 ± 0.4 |
| 0100e | 28.5 ± 0.1 | 18.4 ± 0.1 | 5.2 ± 0.0 | 25.7 ± 0.1 | 3.6 ± 0.0 |
| 0100d | 29.1 ± 0.9 | 19.0 ± 1.0 | 5.1 ± 0.0 | 26.5 ± 1.0 | 3.7 ± 0.2 |
| 0100c | 29.0 ± 0.2 | 19.2 ± 0.1 | 5.1 ± 0.0 | 26.2 ± 0.3 | 3.9 ± 0.3 |
| 0100b | 28.5 ± 0.0 | 18.8 ± 0.7 | 5.2 ± 0.0 | 25.6 ± 0.0 | 3.9 ± 0.5 |
| 0100a | 28.6 ± 0.1 | 18.3 ± 0.0 | 5.2 ± 0.1 | 25.7 ± 0.0 | 3.7 ± 0.2 |
| 0111  | 28.9 ± 0.7 | 18.8 ± 0.8 | 5.2 ± 0.1 | 26.2 ± 0.6 | 3.5 ± 0.1 |
| 0110  | 28.6 ± 0.0 | 18.5 ± 0.1 | 5.2 ± 0.0 | 25.7 ± 0.1 | 3.7 ± 0.1 |
| 0101  | 28.5 ± 0.2 | 18.2 ± 0.3 | 5.2 ± 0.1 | 25.7 ± 0.2 | 3.7 ± 0.1 |
| 0100  | 28.6 ± 0.1 | 18.4 ± 0.1 | 5.2 ± 0.1 | 25.8 ± 0.1 | 3.8 ± 0.1 |
| <hr/> |            |            |           |            |           |
| 1000f | 29.0 ± 0.6 | 20.7 ± 0.8 | 5.0 ± 0.0 | 26.1 ± 0.6 | 5.1 ± 0.4 |
| 1000e | 28.5 ± 0.4 | 20.3 ± 0.2 | 5.1 ± 0.1 | 25.7 ± 0.3 | 5.3 ± 0.3 |
| 1000d | 28.5 ± 0.3 | 19.5 ± 0.4 | 5.0 ± 0.0 | 25.6 ± 0.4 | 4.3 ± 0.5 |
| 1000c | 28.9 ± 0.2 | 20.7 ± 0.2 | 5.0 ± 0.0 | 25.9 ± 0.3 | 5.3 ± 0.1 |
| 1000b | 28.5 ± 0.3 | 20.5 ± 0.3 | 5.1 ± 0.0 | 25.4 ± 0.2 | 5.9 ± 0.1 |
| 1000a | 28.4 ± 0.2 | 19.7 ± 0.3 | 5.1 ± 0.0 | 25.4 ± 0.3 | 4.6 ± 0.4 |
| 1011  | 28.4 ± 0.1 | 20.2 ± 0.1 | 4.8 ± 0.1 | 25.4 ± 0.2 | 5.3 ± 0.3 |
| 1010  | 28.6 ± 0.1 | 20.3 ± 0.4 | 4.9 ± 0.1 | 25.6 ± 0.2 | 4.9 ± 0.6 |
| 1001  | 28.7 ± 0.2 | 20.6 ± 0.1 | 5.0 ± 0.2 | 25.6 ± 0.0 | 5.8 ± 0.3 |
| 1000  | 28.4 ± 0.3 | 20.4 ± 0.4 | 5.0 ± 0.1 | 25.2 ± 0.2 | 5.8 ± 0.2 |
| <hr/> |            |            |           |            |           |
| 1100f | 29.2 ± 0.2 | 18.8 ± 0.2 | 4.8 ± 0.1 | 26.6 ± 0.3 | 3.8 ± 0.0 |
| 1100e | 28.7 ± 0.1 | 18.4 ± 0.2 | 4.8 ± 0.1 | 25.9 ± 0.1 | 3.8 ± 0.0 |
| 1100d | 29.1 ± 1.4 | 19.3 ± 1.4 | 4.9 ± 0.1 | 26.7 ± 1.1 | 3.9 ± 0.2 |
| 1100c | 29.4 ± 0.4 | 19.6 ± 0.7 | 5.0 ± 0.1 | 26.5 ± 0.4 | 3.8 ± 0.2 |
| 1100b | 29.0 ± 0.1 | 19.4 ± 0.6 | 5.1 ± 0.2 | 26.0 ± 0.2 | 4.3 ± 0.4 |
| 1100a | 28.9 ± 0.3 | 18.6 ± 0.3 | 4.9 ± 0.1 | 26.0 ± 0.1 | 3.7 ± 0.1 |
| 1111  | 28.6 ± 0.3 | 18.2 ± 0.3 | 4.7 ± 0.1 | 25.9 ± 0.3 | 3.8 ± 0.1 |
| 1110  | 29.5 ± 0.8 | 19.4 ± 1.2 | 4.9 ± 0.1 | 26.6 ± 0.9 | 3.9 ± 0.3 |
| 1101  | 29.1 ± 0.1 | 19.0 ± 0.6 | 5.0 ± 0.1 | 26.0 ± 0.0 | 4.0 ± 0.4 |
| 1100  | 28.8 ± 0.2 | 19.0 ± 0.9 | 4.9 ± 0.1 | 25.9 ± 0.1 | 4.1 ± 0.6 |



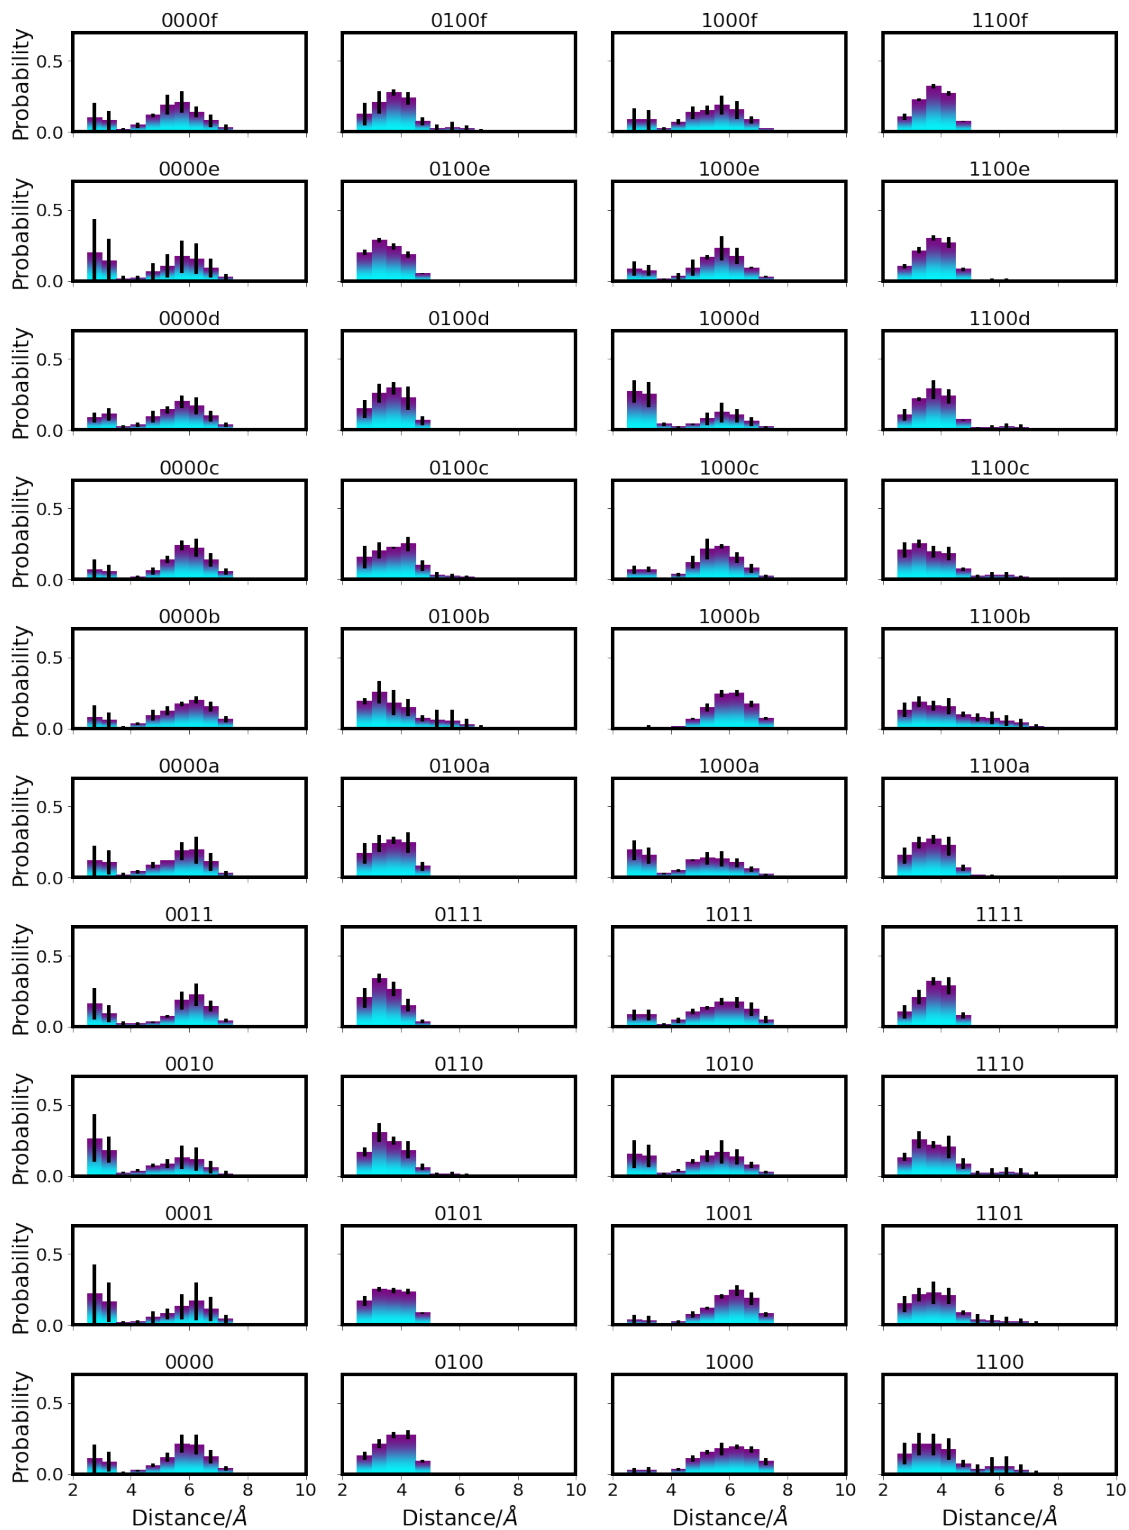

Figure S1: Distribution of distances between N121 and N139 in different protonation models of CcO.

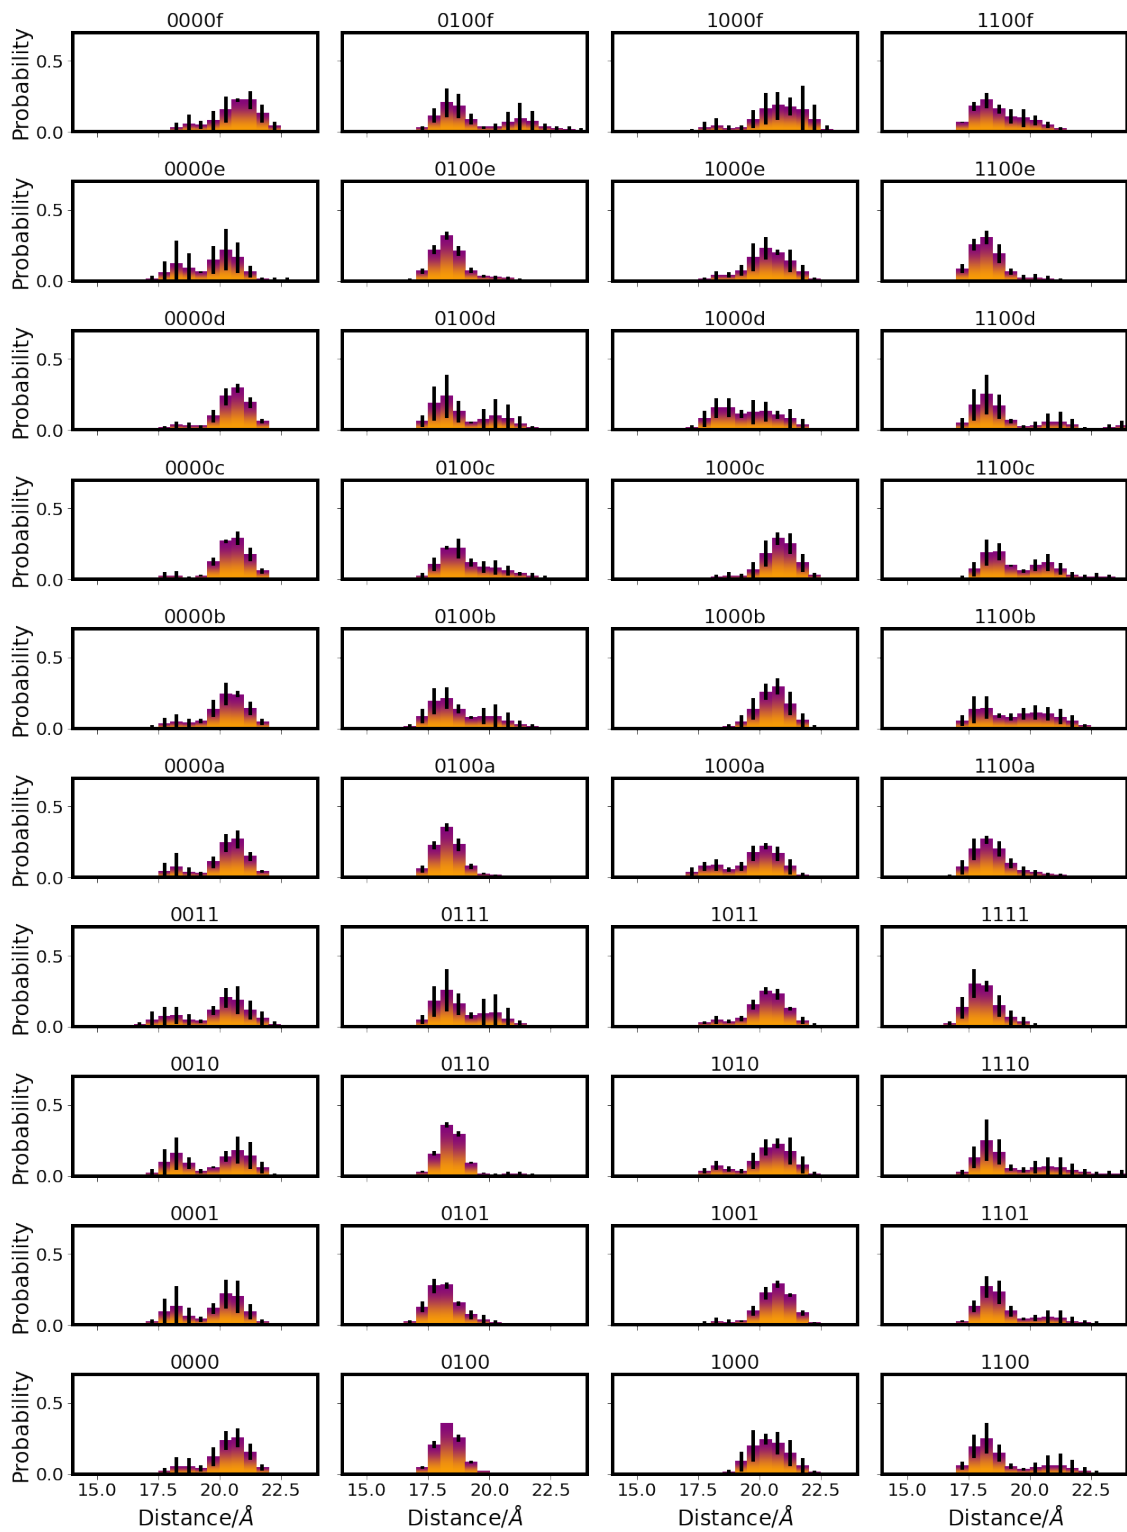

Figure S2: Distribution of distances between E286 and N139 in different protonation models of CcO.

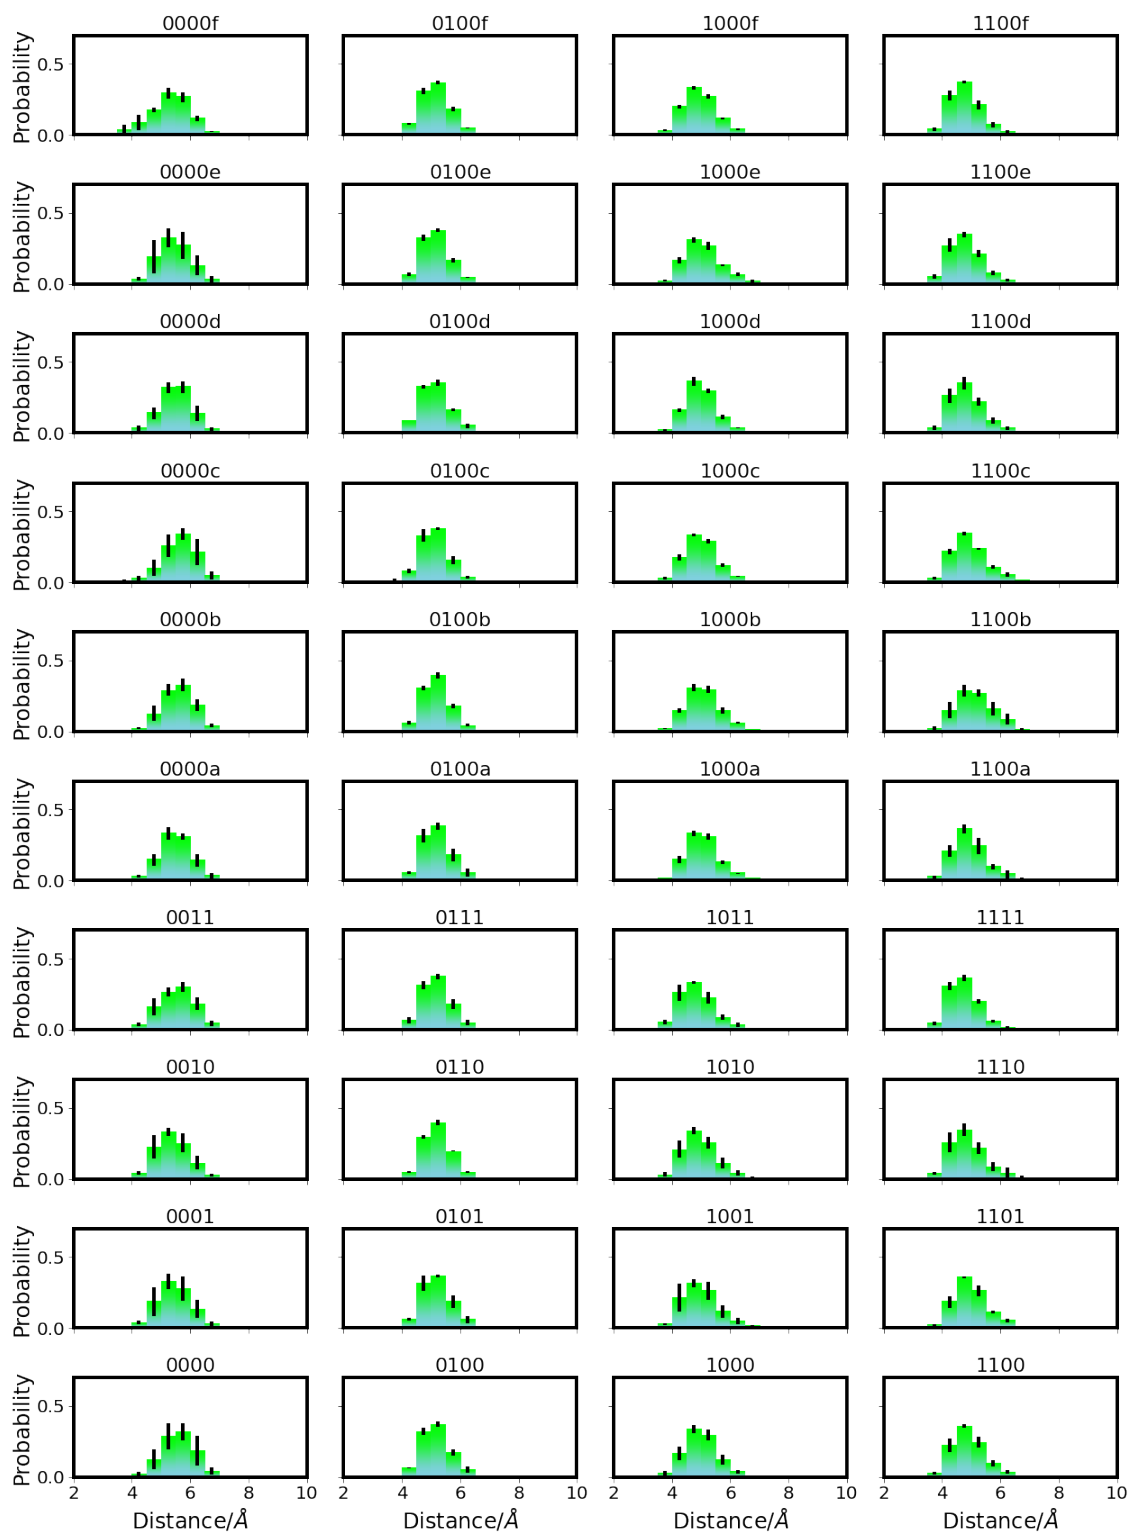

Figure S3: Distribution of distances between H26 and D132 in different protonation models of CcO.

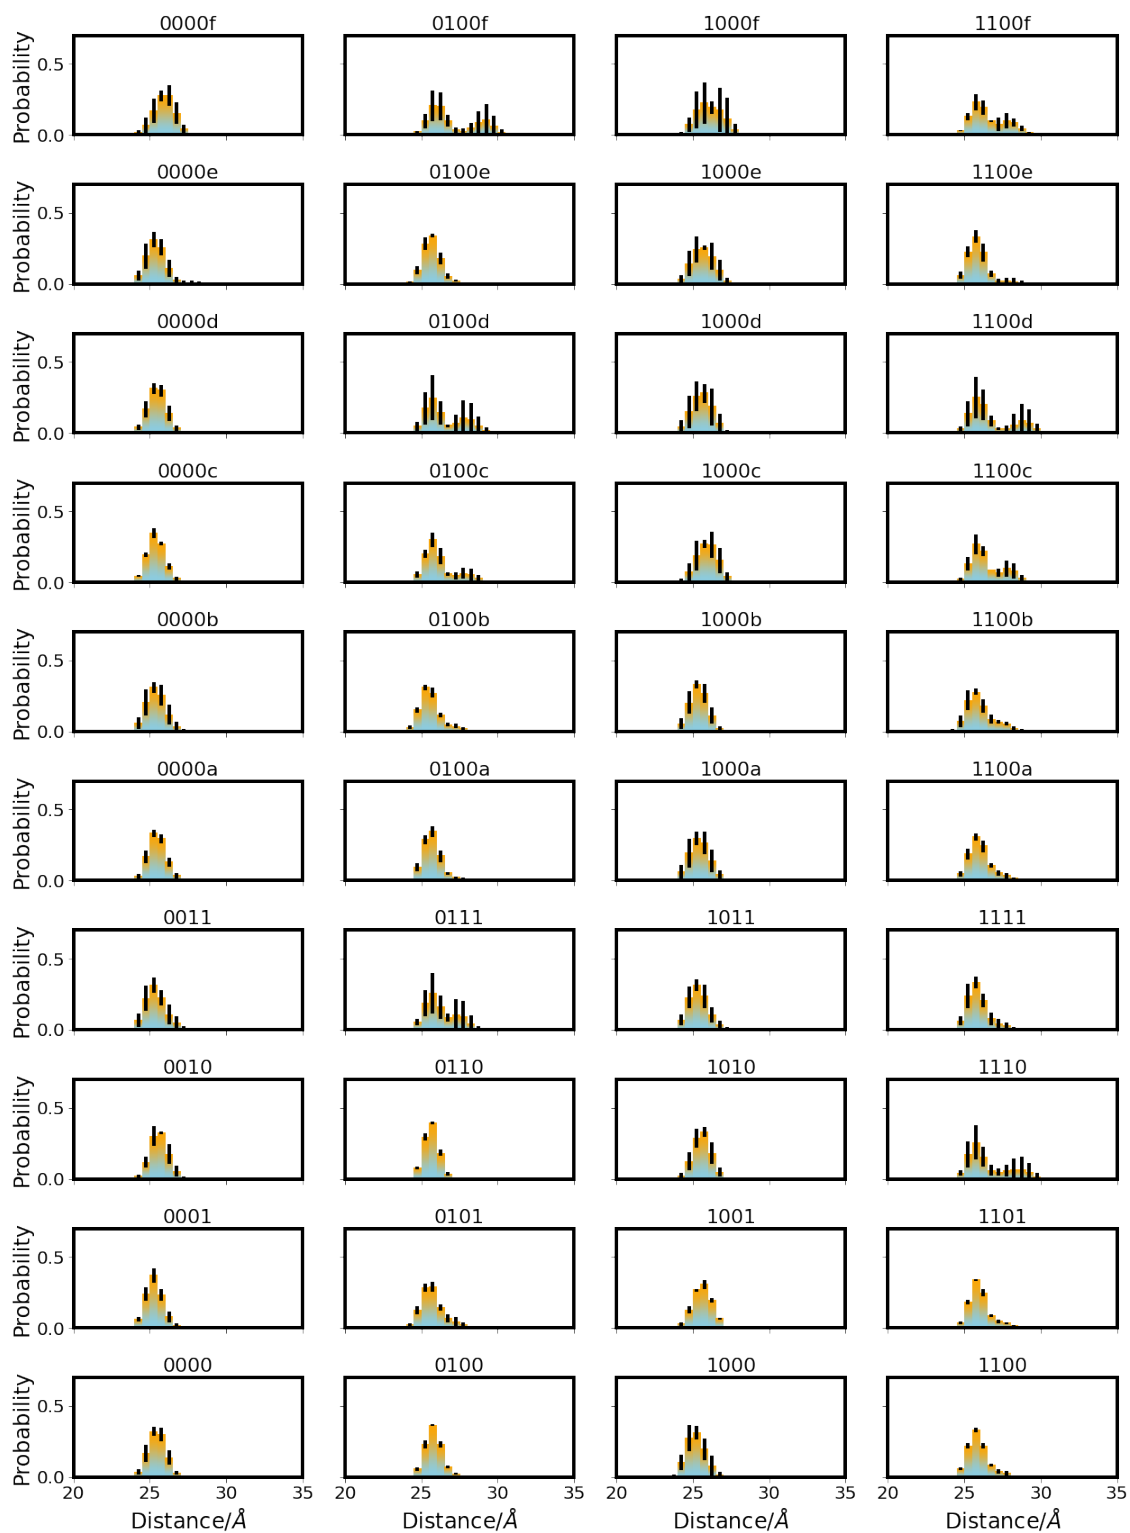

Figure S4: Distribution of distances between H26 and E286 in different protonation models of CcO.

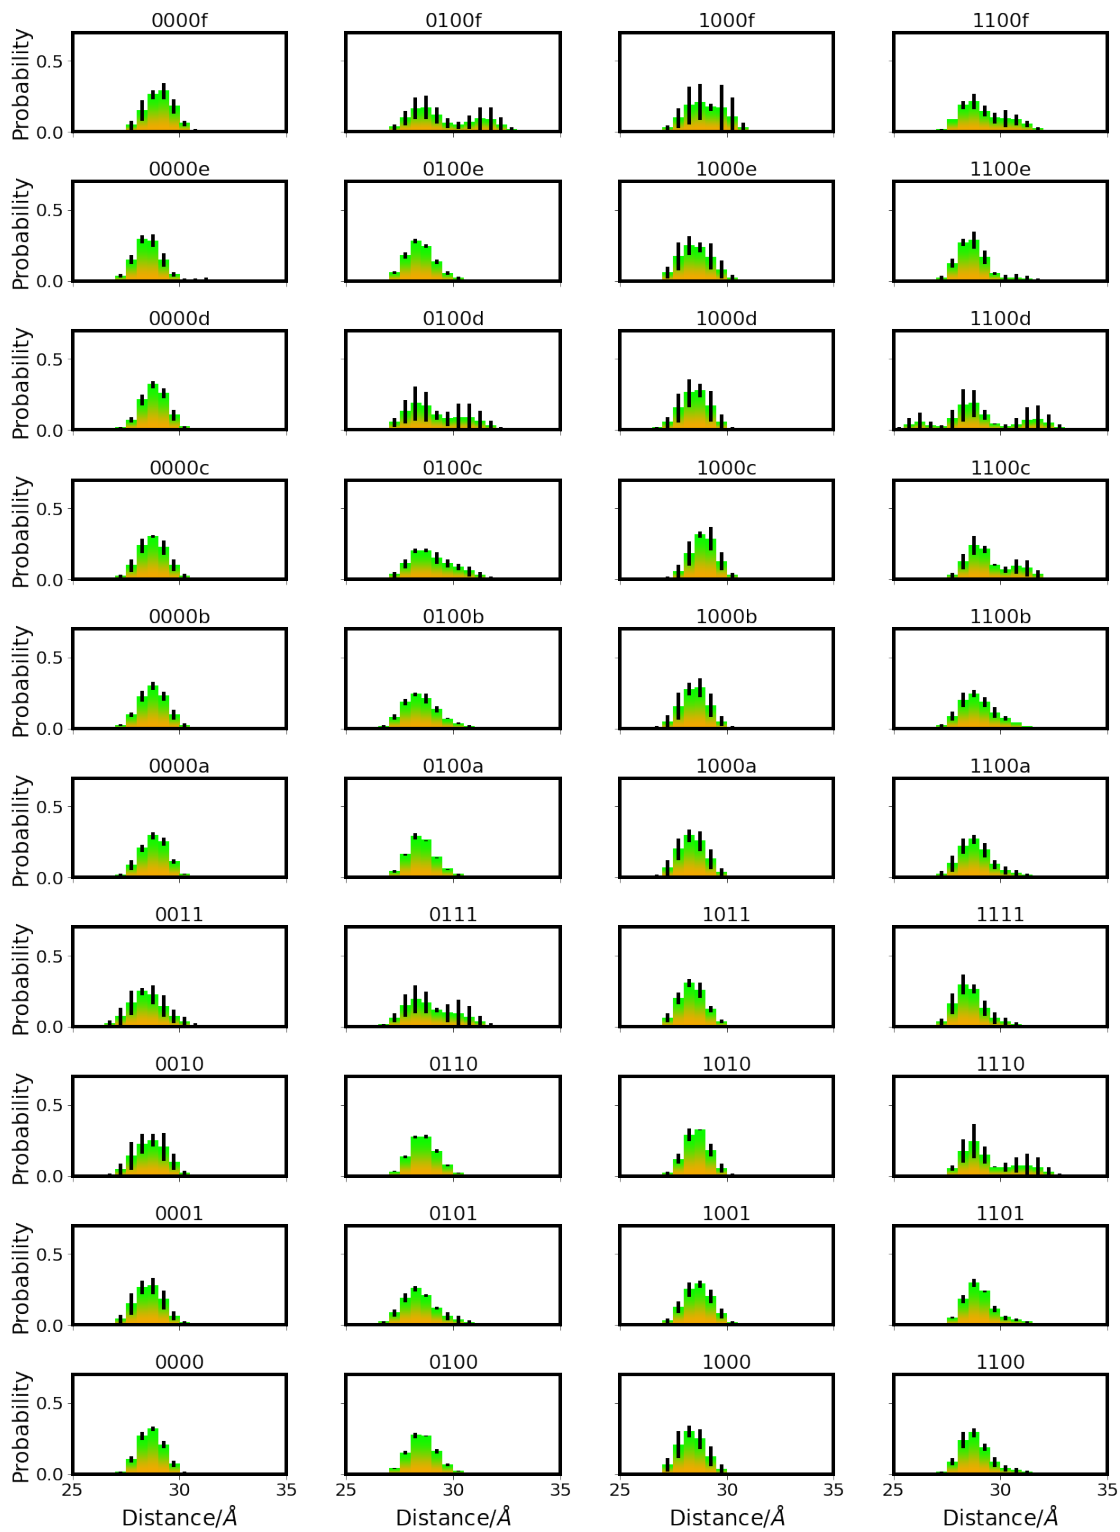

Figure S5: Distribution of distances between E286 and D132 in different protonation models of CcO.

Table S2: Average distances(in Å) between important residues in the K-channel.

| Model | H96-Y288   | E101-Y288  | Y288-K362  | T359-K362 |
|-------|------------|------------|------------|-----------|
| 0000f | 27.2 ± 1.0 | 21.5 ± 0.5 | 8.0 ± 0.8  | 5.5 ± 0.4 |
| 0000e | 29.2 ± 0.8 | 23.3 ± 0.9 | 10.3 ± 0.1 | 4.3 ± 0.1 |
| 0000d | 25.5 ± 2.9 | 22.7 ± 0.2 | 12.7 ± 0.3 | 7.6 ± 0.1 |
| 0000c | 27.0 ± 2.2 | 22.1 ± 0.3 | 11.1 ± 0.4 | 6.2 ± 0.5 |
| 0000b | 26.8 ± 1.2 | 22.4 ± 1.5 | 12.5 ± 0.6 | 7.0 ± 0.5 |
| 0000a | 29.9 ± 2.3 | 23.4 ± 0.1 | 13.4 ± 0.2 | 7.8 ± 0.2 |
| 0011  | 28.2 ± 1.9 | 21.6 ± 0.9 | 9.9 ± 0.3  | 4.4 ± 0.0 |
| 0010  | 25.6 ± 1.4 | 22.3 ± 0.2 | 10.4 ± 0.3 | 5.8 ± 0.2 |
| 0001  | 29.8 ± 0.4 | 21.1 ± 0.8 | 13.7 ± 0.1 | 7.7 ± 0.1 |
| 0000  | 27.9 ± 1.8 | 23.4 ± 0.3 | 12.8 ± 0.6 | 7.0 ± 0.5 |
| 0100f | 26.9 ± 2.6 | 21.5 ± 0.1 | 8.3 ± 0.1  | 5.1 ± 1.2 |
| 0100e | 26.8 ± 1.9 | 23.1 ± 0.3 | 10.7 ± 0.4 | 4.5 ± 0.6 |
| 0100d | 25.9 ± 0.5 | 22.2 ± 0.5 | 12.6 ± 2.2 | 7.5 ± 1.5 |
| 0100c | 26.3 ± 0.7 | 21.7 ± 0.2 | 10.0 ± 0.1 | 5.8 ± 0.6 |
| 0100b | 26.5 ± 1.0 | 22.0 ± 0.9 | 13.0 ± 0.3 | 7.3 ± 0.3 |
| 0100a | 29.7 ± 0.3 | 23.2 ± 0.0 | 13.2 ± 0.2 | 7.5 ± 0.3 |
| 0111  | 28.9 ± 0.4 | 20.9 ± 0.7 | 10.8 ± 0.7 | 5.7 ± 0.0 |
| 0110  | 28.0 ± 4.6 | 21.9 ± 0.3 | 10.9 ± 0.1 | 5.7 ± 0.1 |
| 0101  | 28.0 ± 1.7 | 21.3 ± 0.9 | 12.4 ± 0.4 | 6.8 ± 0.3 |
| 0100  | 29.0 ± 1.1 | 23.4 ± 0.1 | 12.8 ± 0.7 | 7.0 ± 0.5 |
| 1000f | 25.6 ± 1.8 | 22.0 ± 0.3 | 8.5 ± 0.2  | 5.4 ± 0.2 |
| 1000e | 29.3 ± 2.3 | 22.3 ± 0.3 | 9.9 ± 0.4  | 4.5 ± 0.6 |
| 1000d | 29.1 ± 3.8 | 22.7 ± 0.2 | 13.7 ± 0.6 | 8.1 ± 1.0 |
| 1000c | 27.1 ± 1.8 | 21.7 ± 0.6 | 11.0 ± 1.1 | 6.8 ± 0.2 |
| 1000b | 27.1 ± 1.7 | 21.3 ± 0.8 | 11.9 ± 0.9 | 6.6 ± 0.7 |
| 1000a | 29.7 ± 0.3 | 23.2 ± 0.5 | 13.0 ± 0.7 | 7.3 ± 0.3 |
| 1011  | 28.0 ± 1.8 | 21.5 ± 1.1 | 10.6 ± 0.3 | 5.0 ± 0.2 |
| 1010  | 26.6 ± 1.8 | 22.5 ± 0.3 | 11.3 ± 0.8 | 5.8 ± 0.1 |
| 1001  | 28.7 ± 1.2 | 21.2 ± 1.3 | 12.6 ± 0.9 | 6.9 ± 0.7 |
| 1000  | 28.8 ± 2.3 | 23.6 ± 0.8 | 11.9 ± 0.5 | 6.2 ± 0.6 |
| 1100f | 28.0 ± 3.3 | 21.3 ± 0.2 | 7.6 ± 0.5  | 5.2 ± 0.1 |
| 1100e | 28.4 ± 0.5 | 22.5 ± 0.6 | 9.8 ± 0.3  | 4.4 ± 0.1 |
| 1100d | 23.9 ± 0.8 | 21.6 ± 0.5 | 13.0 ± 0.9 | 8.9 ± 0.7 |
| 1100c | 25.4 ± 1.1 | 21.7 ± 0.1 | 11.1 ± 0.1 | 6.7 ± 0.2 |
| 1100b | 26.8 ± 2.3 | 20.1 ± 0.4 | 12.6 ± 0.0 | 7.6 ± 0.2 |
| 1100a | 30.3 ± 0.5 | 23.0 ± 0.2 | 12.9 ± 0.6 | 7.7 ± 0.3 |
| 1111  | 28.4 ± 0.5 | 22.0 ± 0.5 | 10.3 ± 0.8 | 5.1 ± 0.4 |
| 1110  | 28.1 ± 0.5 | 21.8 ± 0.3 | 10.4 ± 0.3 | 5.7 ± 0.2 |
| 1101  | 28.5 ± 0.7 | 21.5 ± 0.7 | 12.0 ± 0.8 | 6.8 ± 0.4 |
| 1100  | 29.3 ± 1.1 | 23.1 ± 0.1 | 12.5 ± 0.7 | 7.0 ± 0.7 |

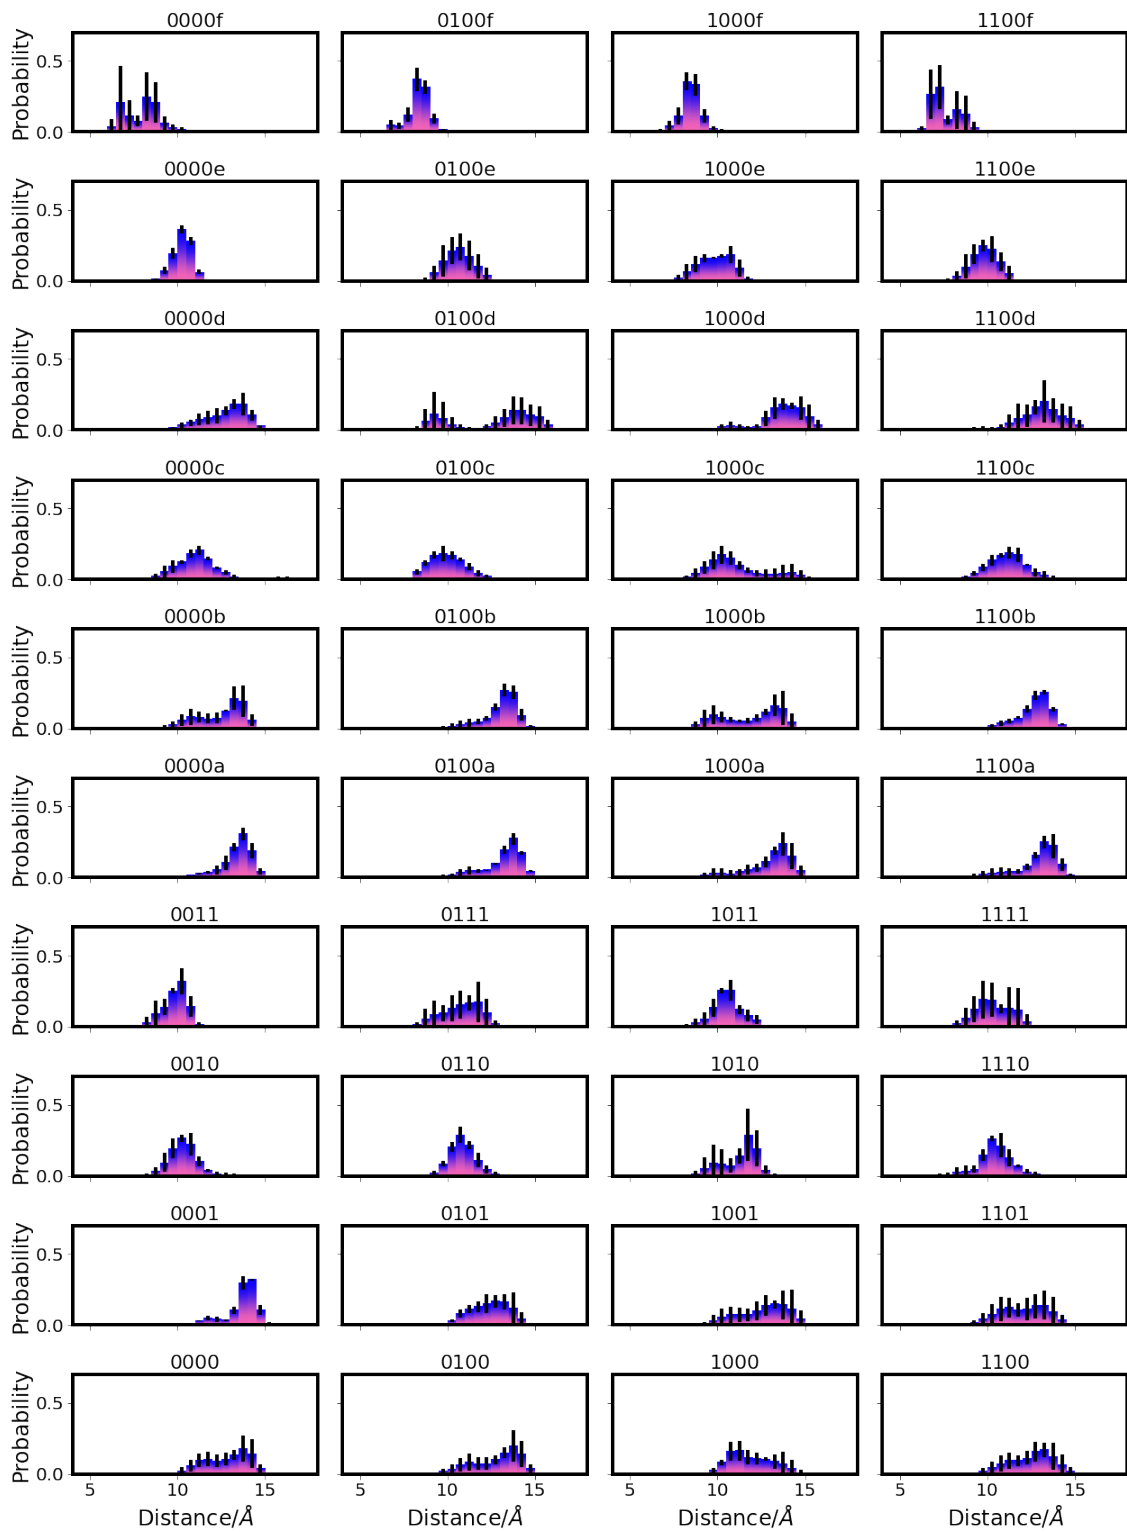

Figure S6: Distribution of distances between Y288 and K362 in different protonation models of CcO.

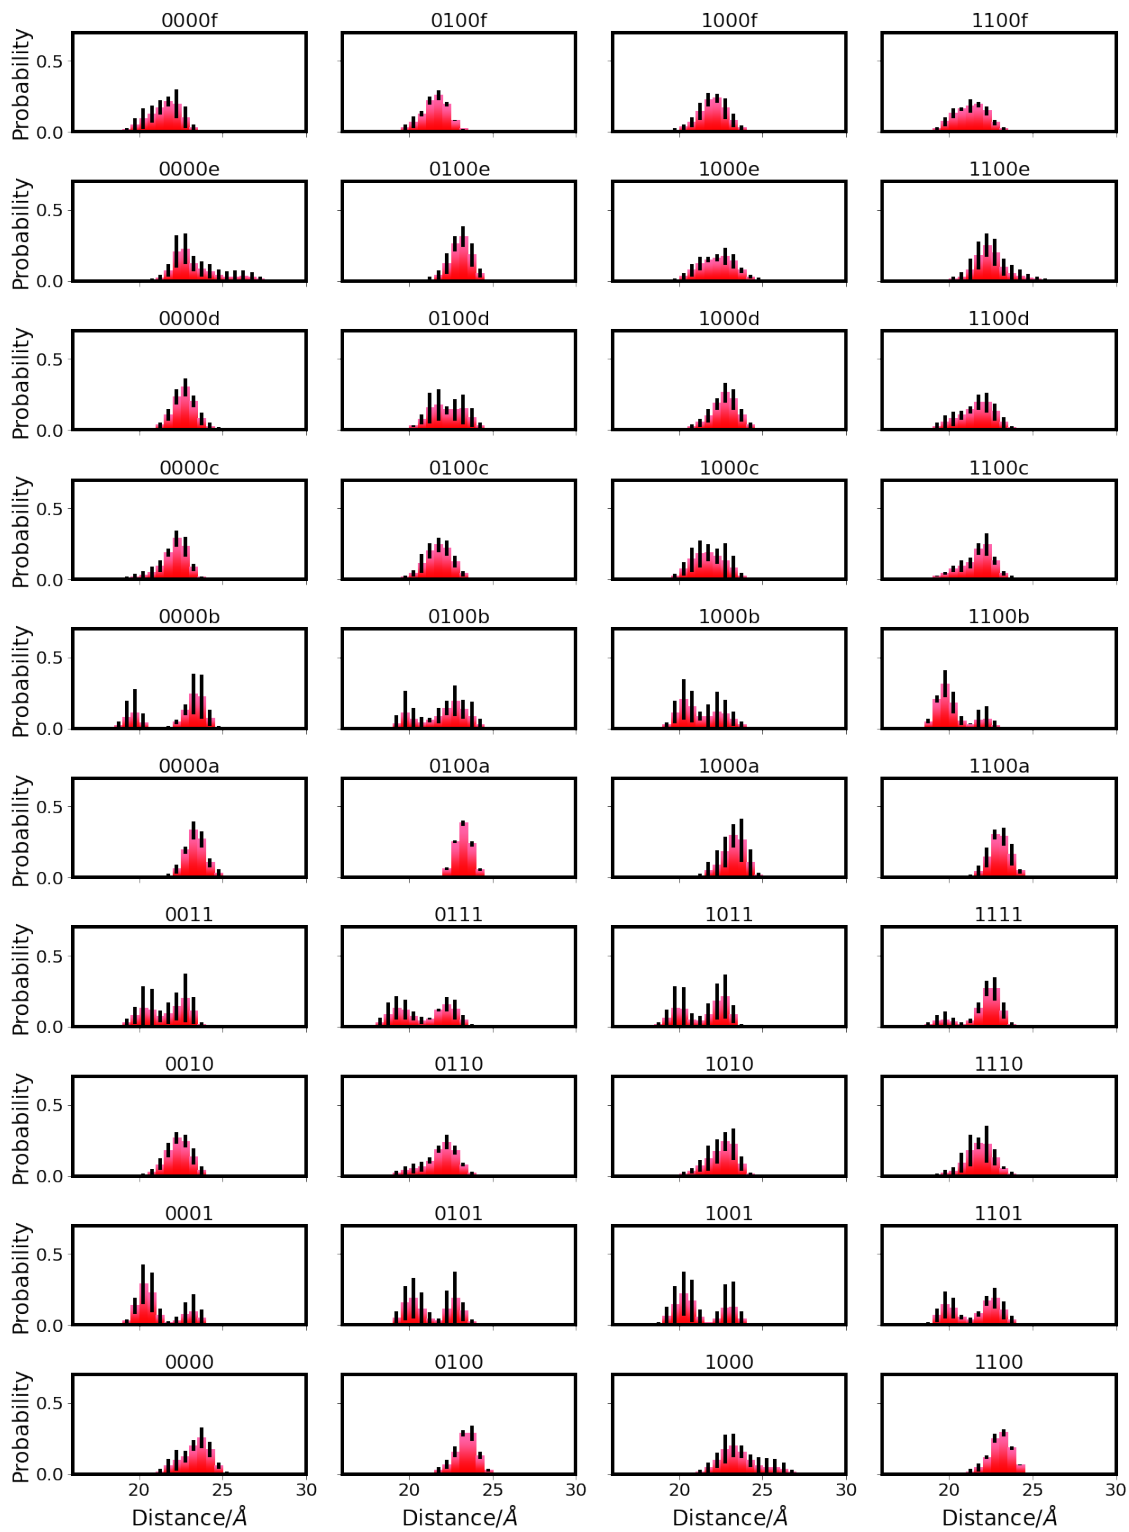

Figure S7: Distribution of distances between E101 and Y288 in different protonation models of CcO.



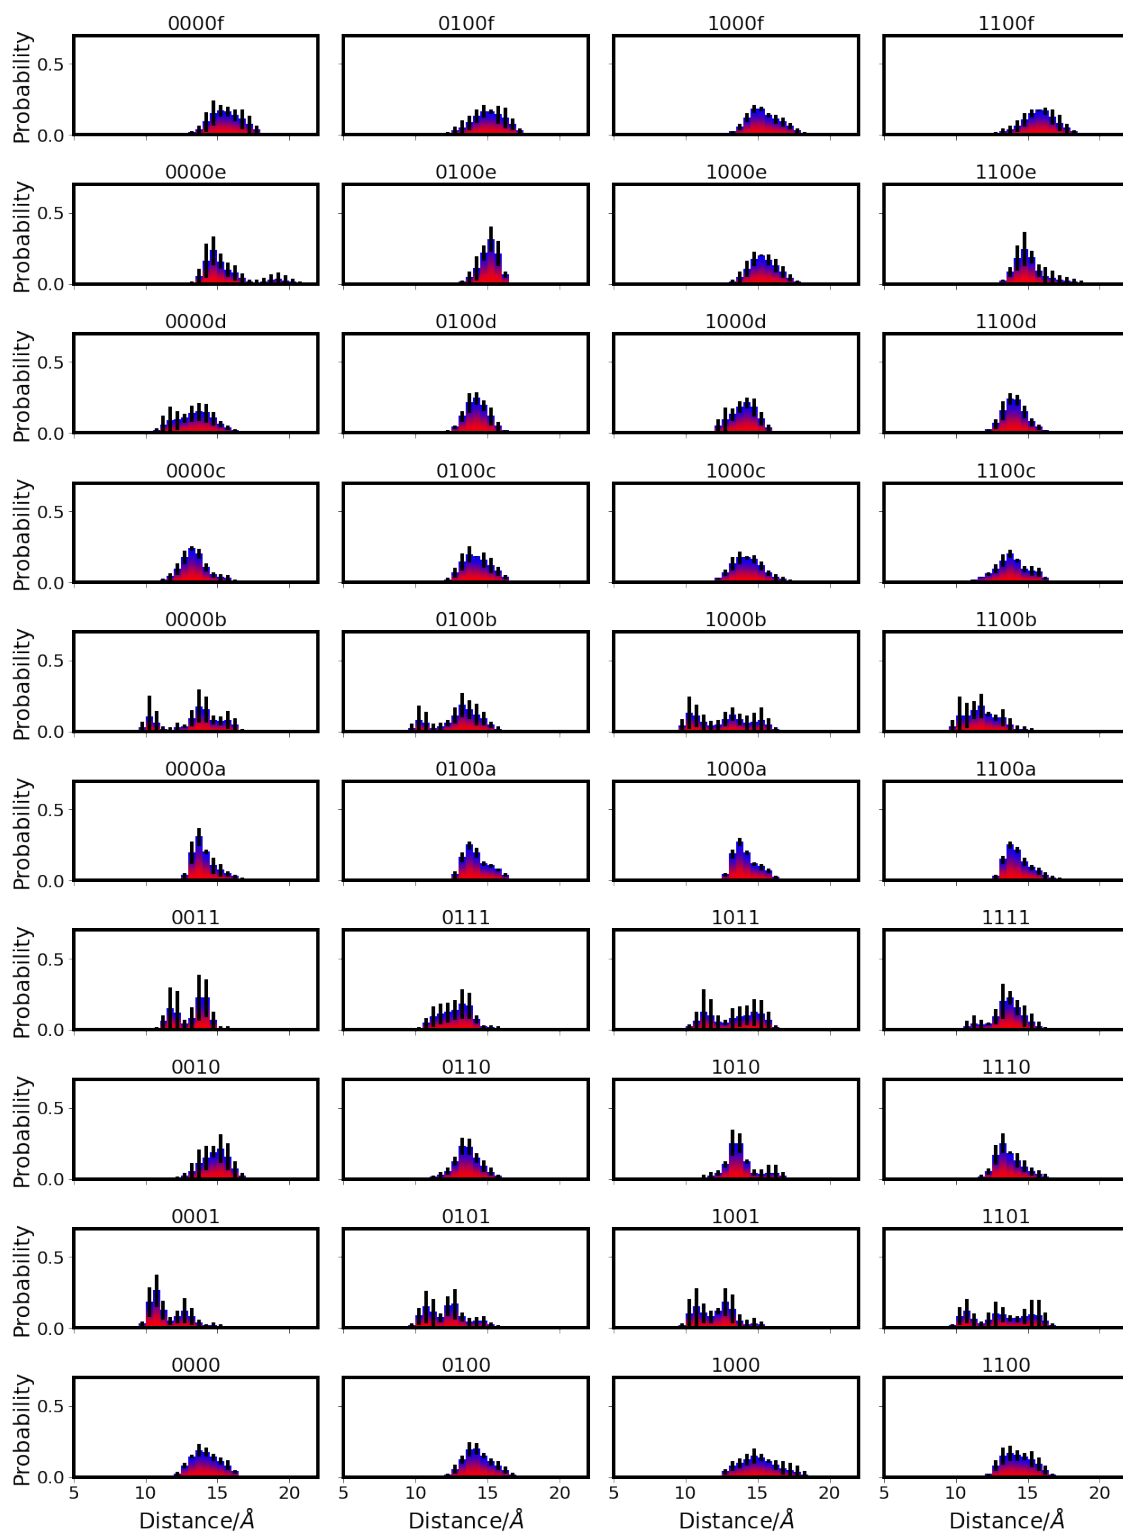

Figure S8: Distribution of distances between E101 and K362 in different protonation models of CcO.

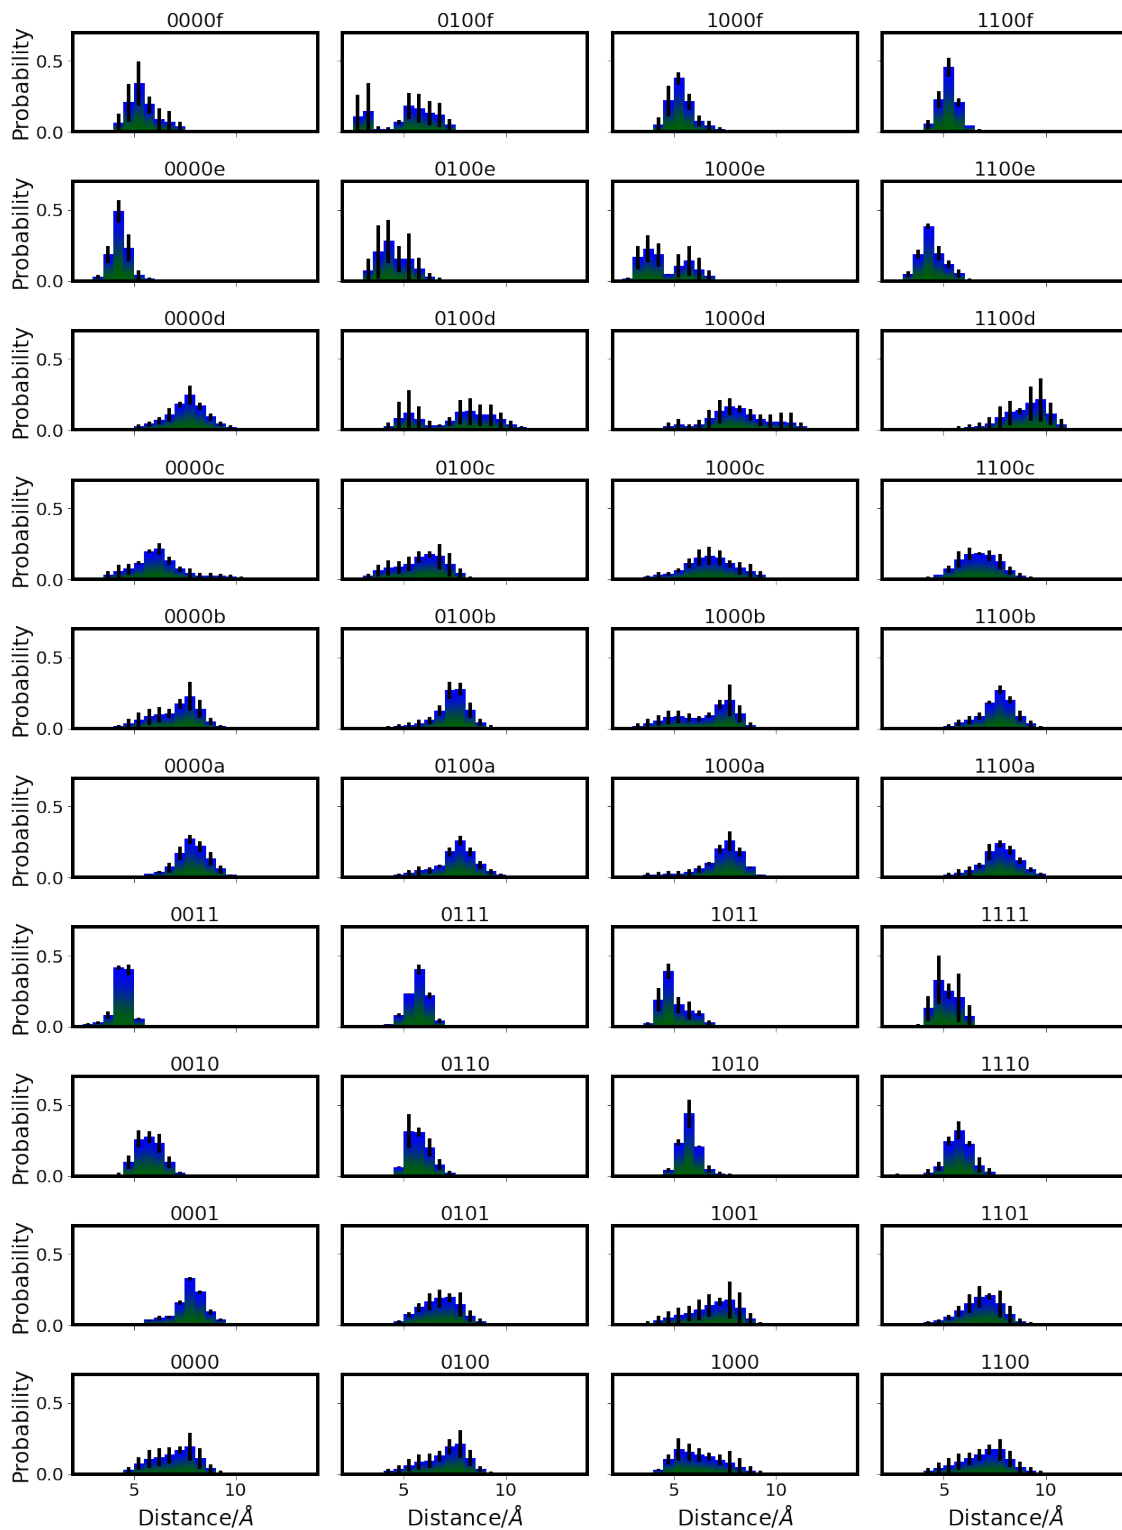

Figure S9: Distribution of distances between T359 and K362 in different protonation models of CcO.

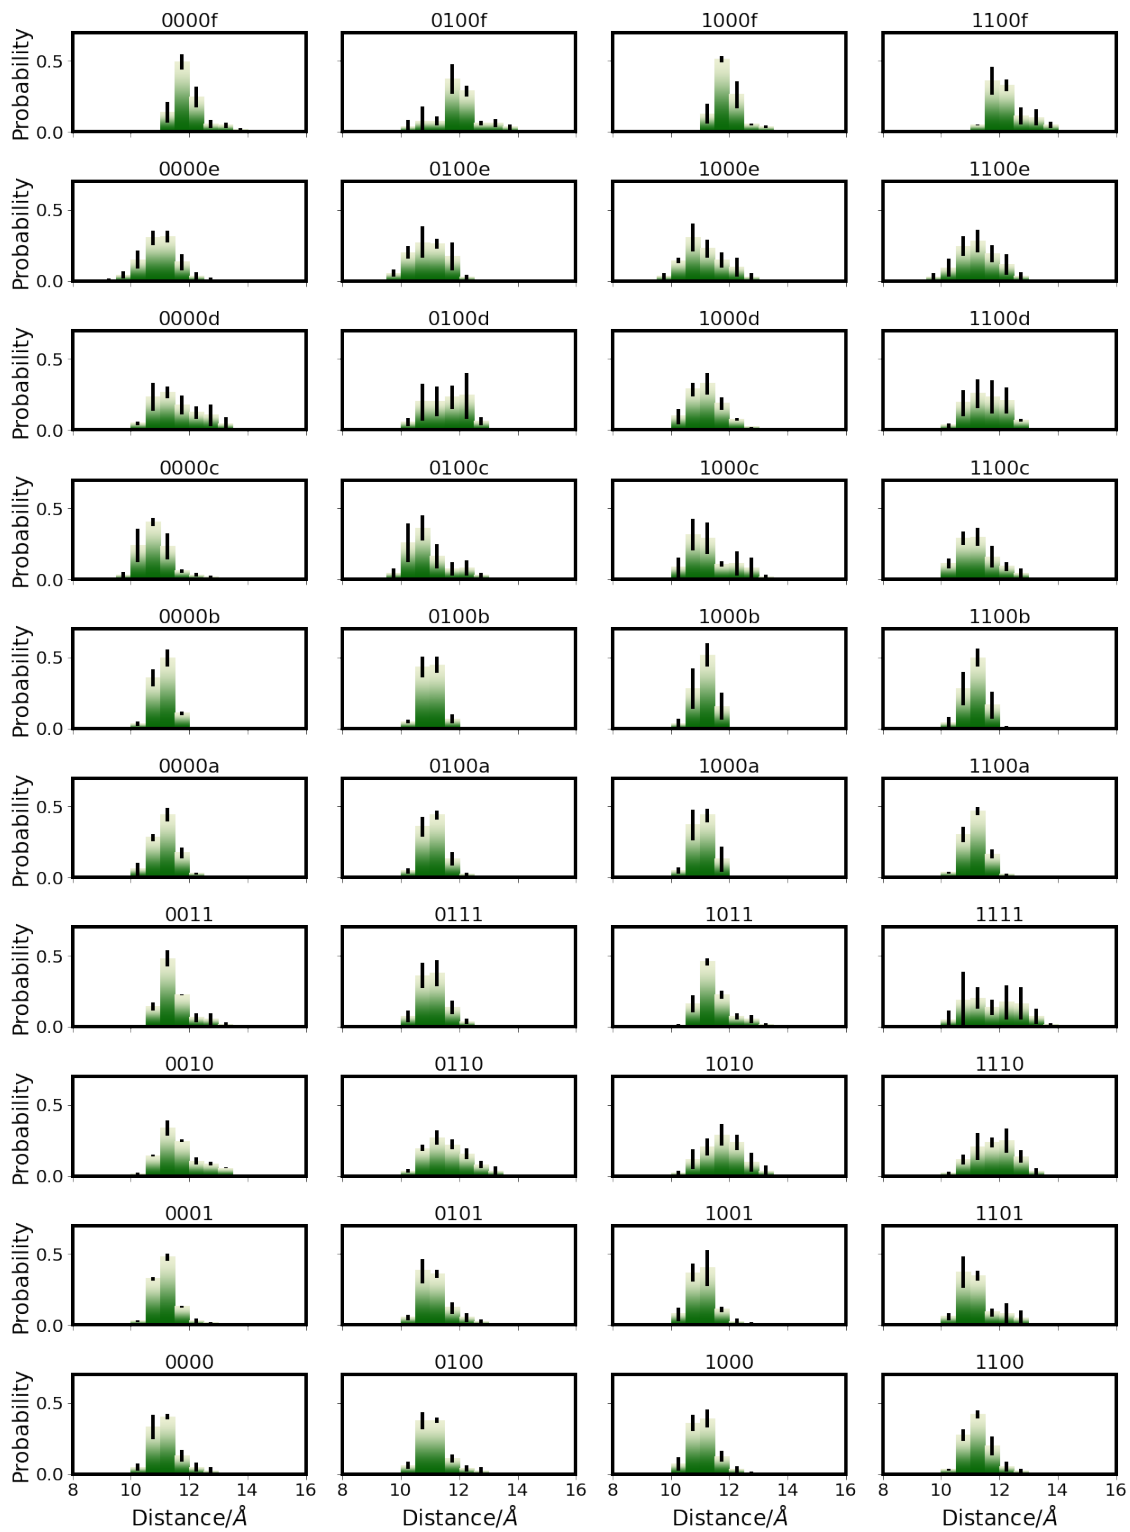

Figure S10: Distribution of distances between S365 and T359 in different protonation models of CcO.

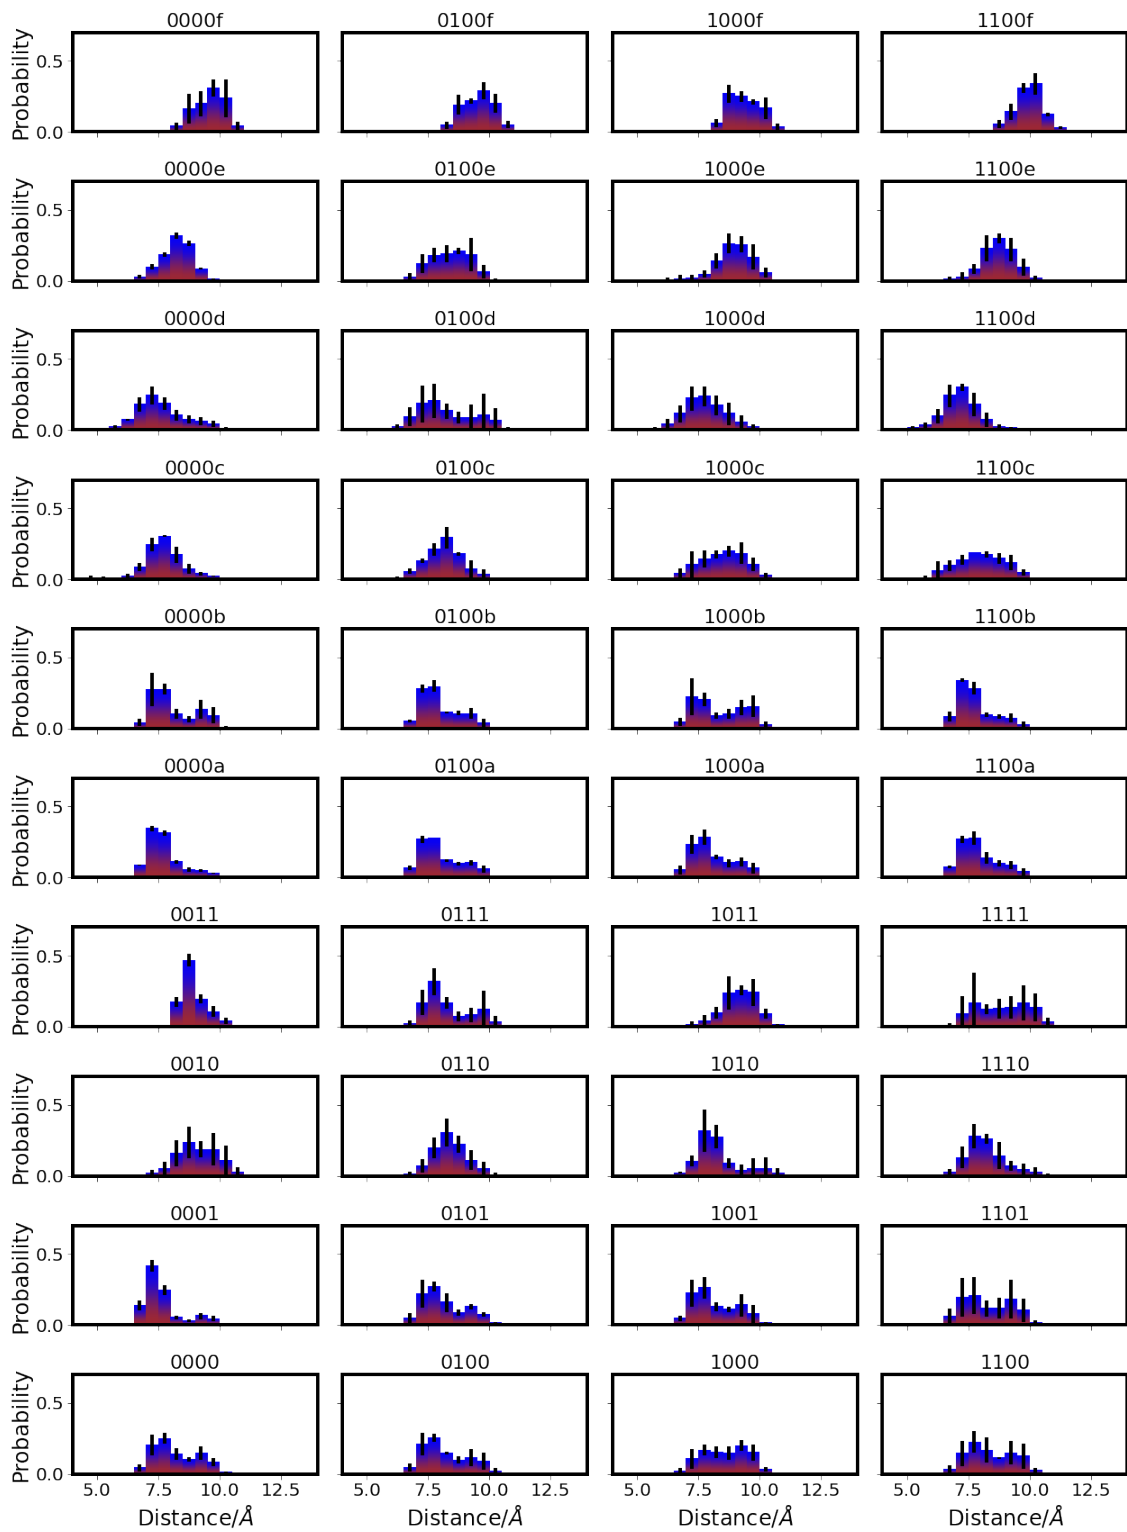

Figure S11: Distribution of distances between S365 and K362 in different protonation models of CcO.

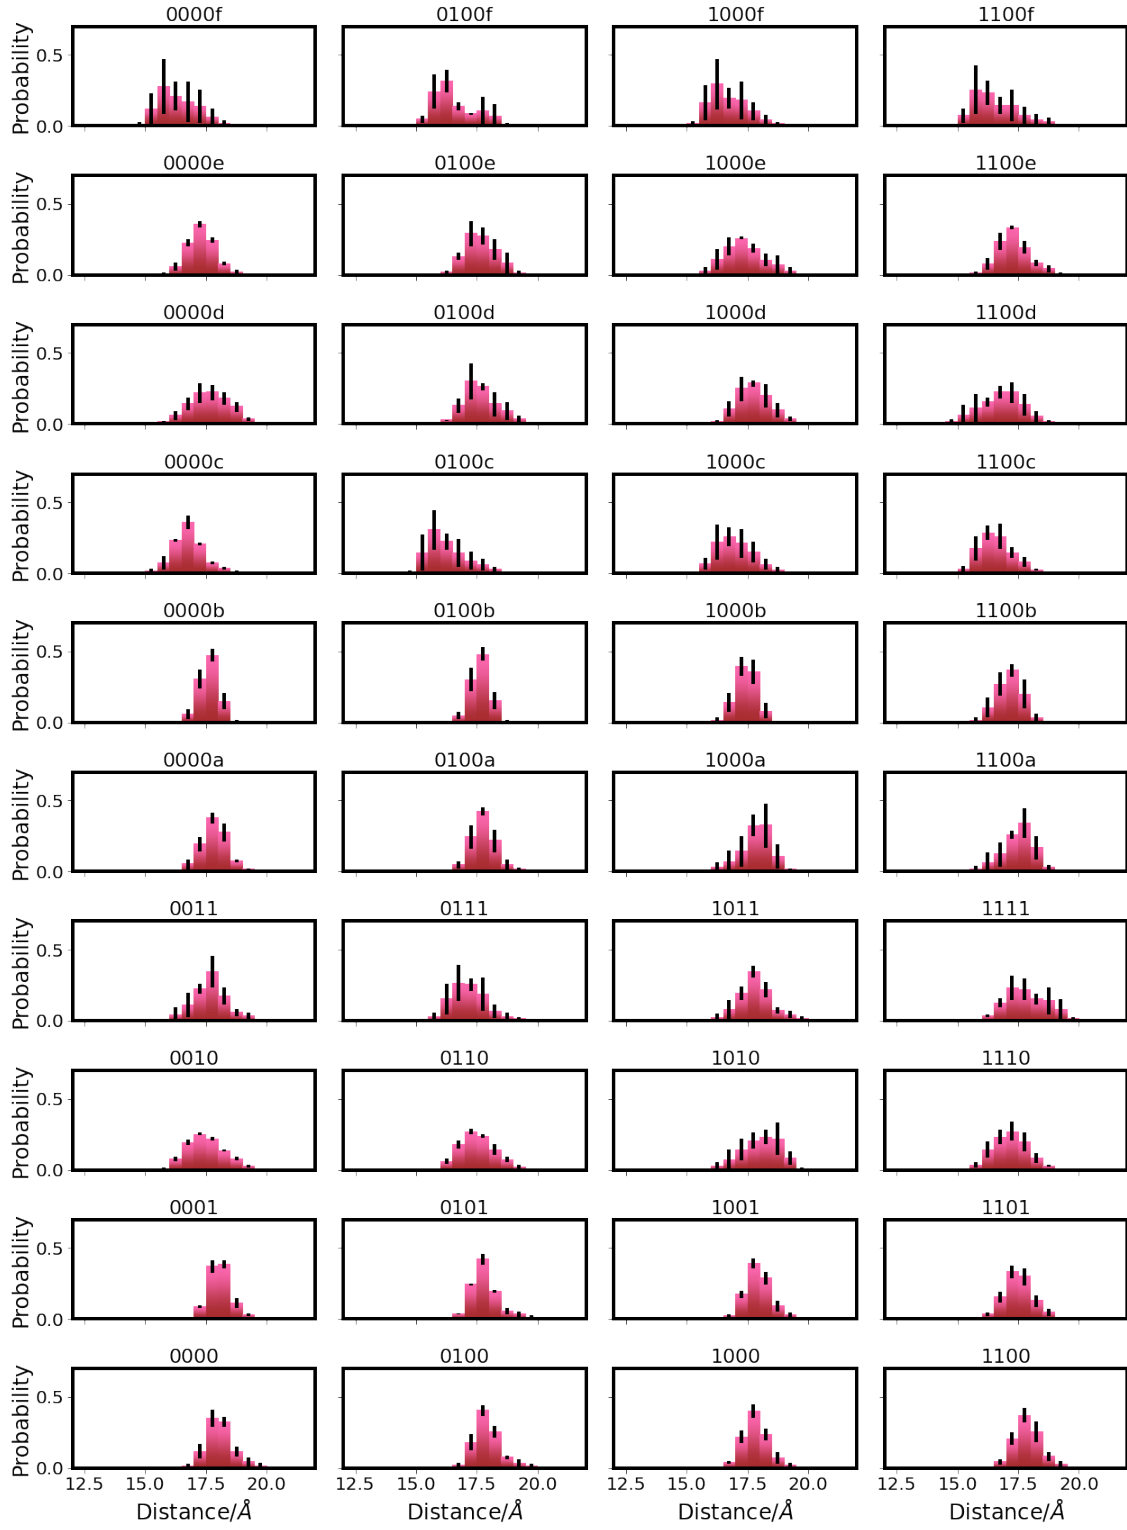

Figure S12: Distribution of distances between S365 and Y288 in different protonation models of CcO.

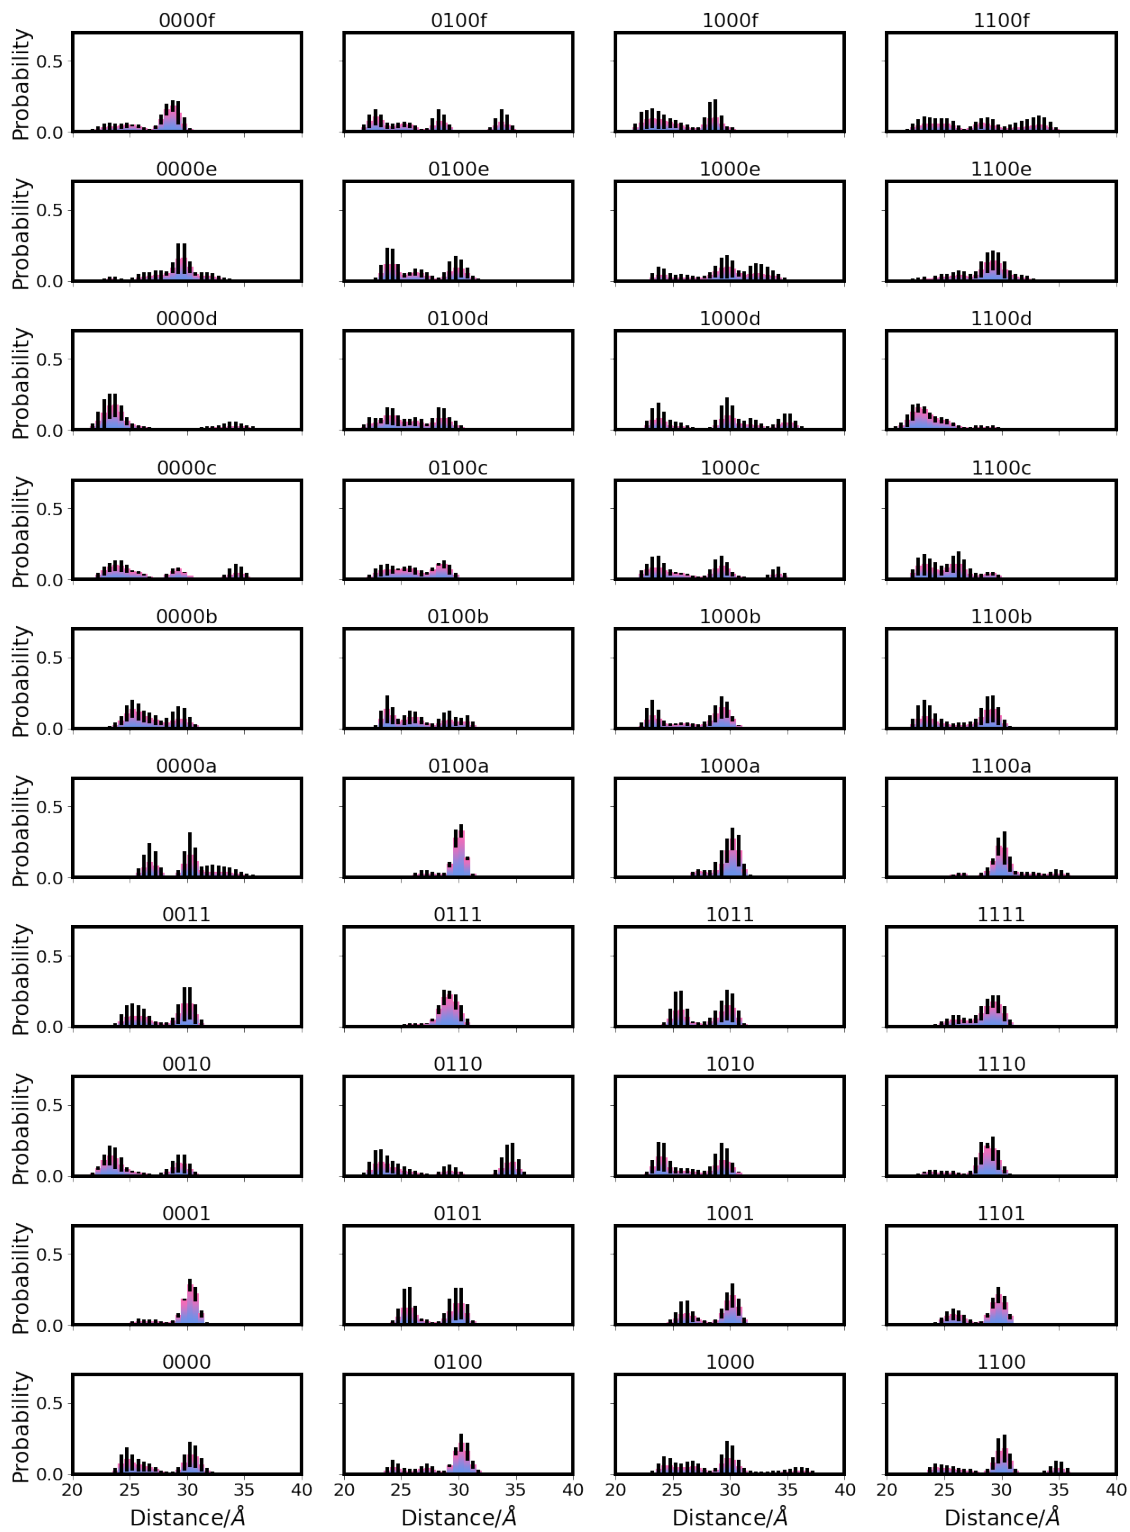

Figure S13: Distribution of distances between H96 and Y288 in different protonation models of CcO.

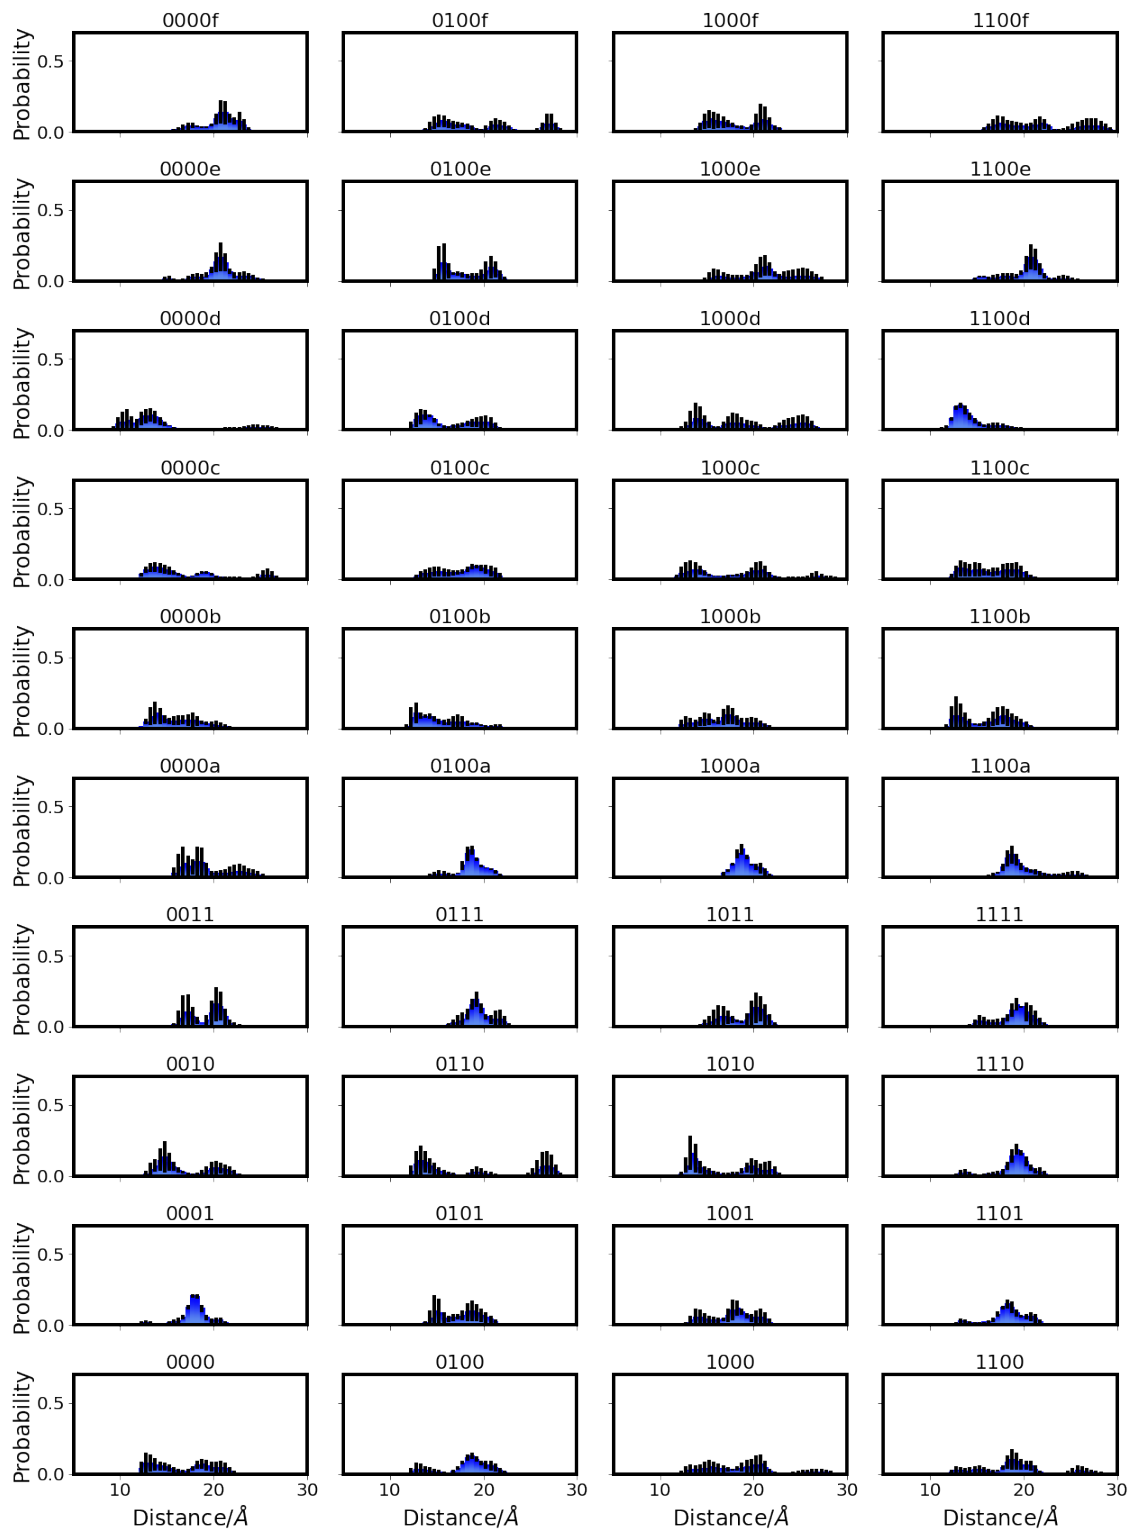

Figure S14: Distribution of distances between H96 and K362 in different protonation models of CcO.

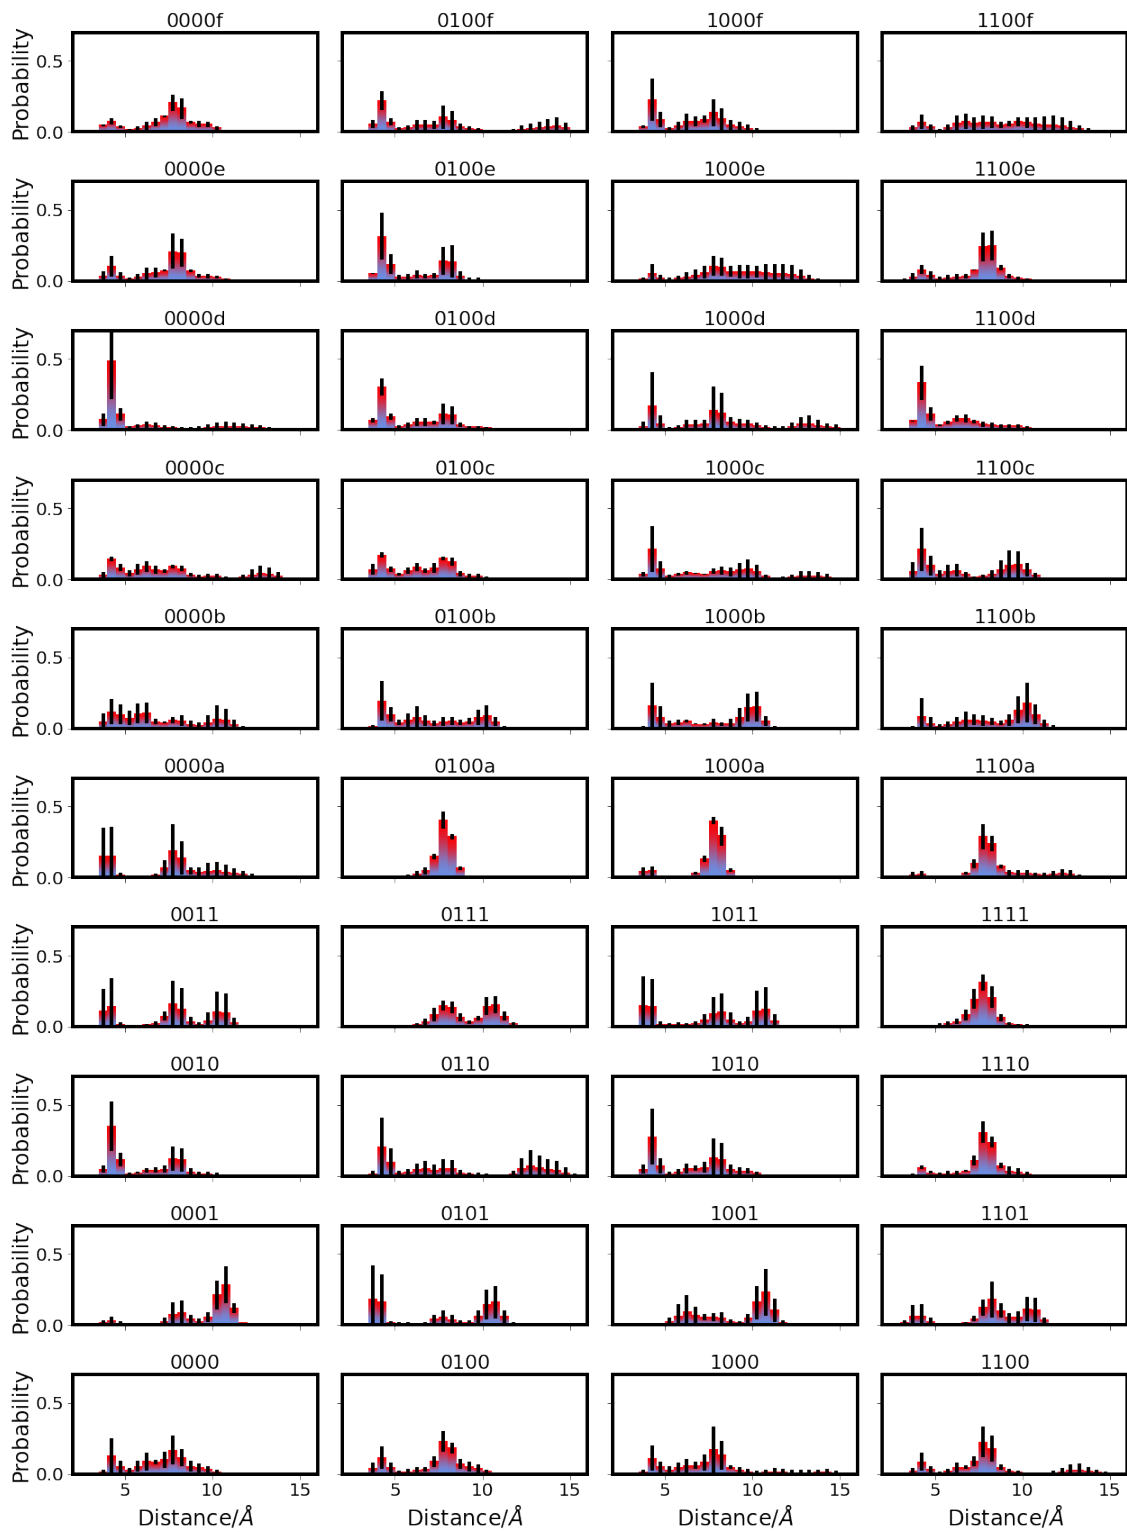

Figure S15: Distribution of distances between H96 and E101 in different protonation models of CcO.



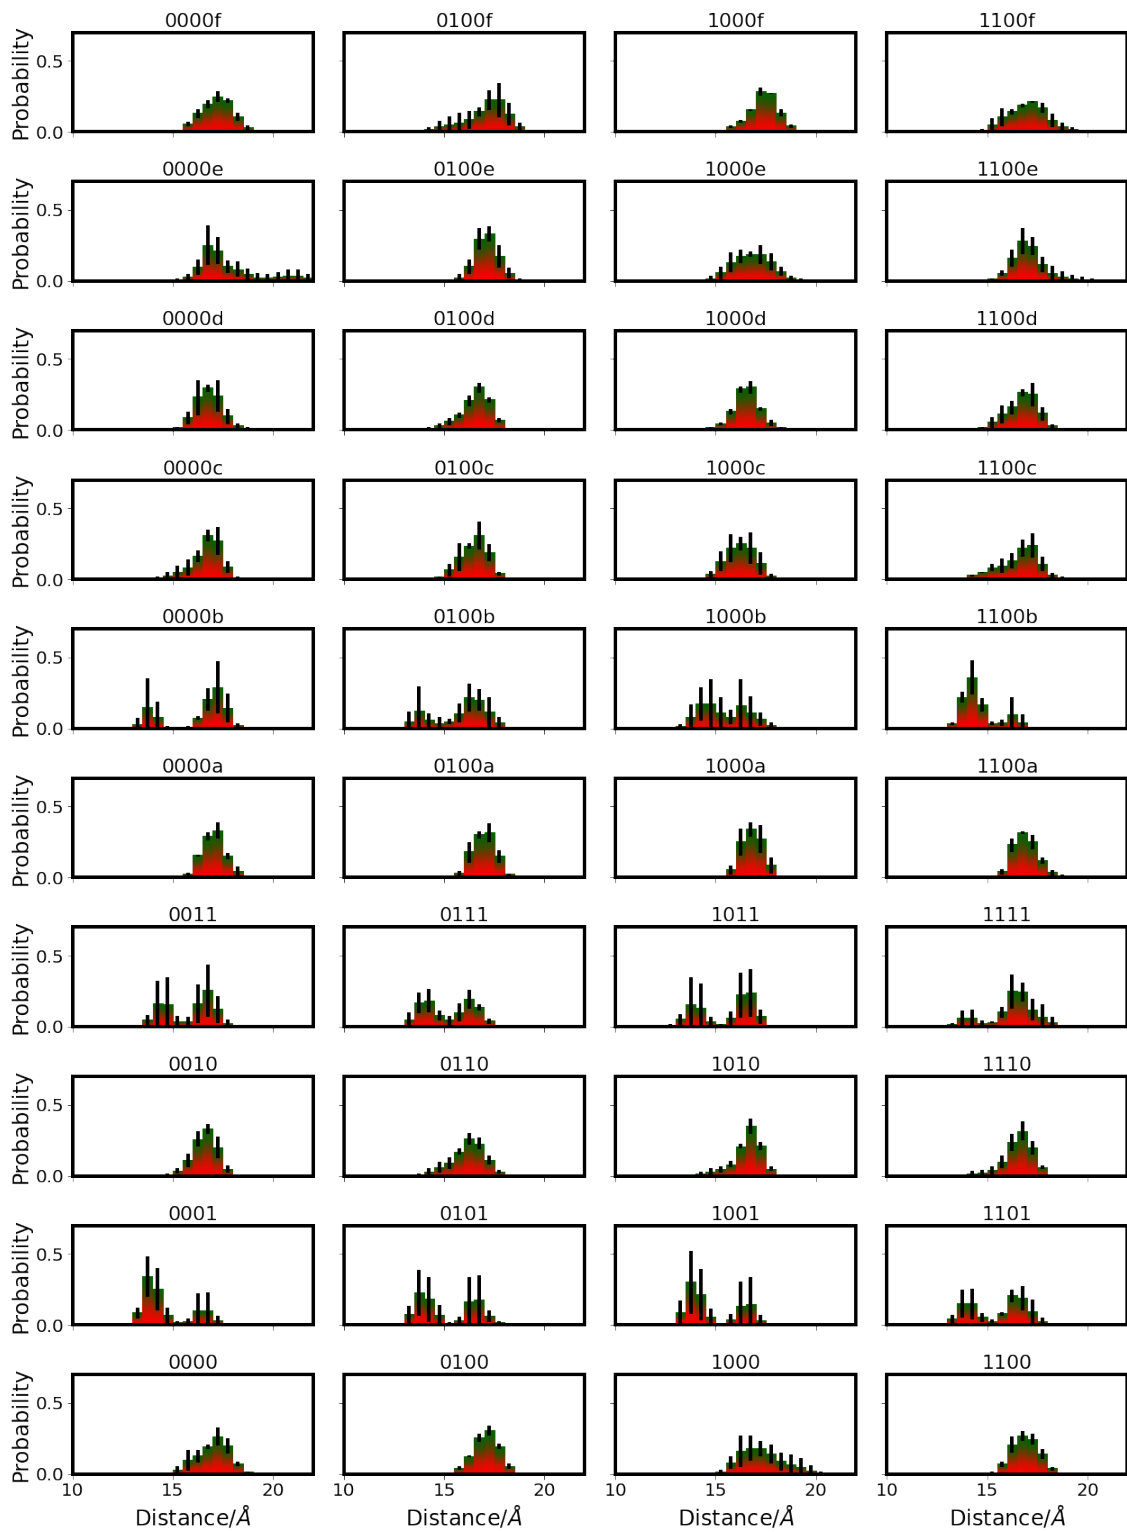

Figure S16: Distribution of distances between E101 and T359 in different protonation models of CcO.

Table S3: Average distances(in Å) between important residues in D- and K-channel.

| System | E286-K362      | E286-Y288      | D132-K362      | D132-E101      | N139-K362      |
|--------|----------------|----------------|----------------|----------------|----------------|
| 0000f  | 17.1 $\pm$ 0.6 | 13.7 $\pm$ 0.0 | 31.4 $\pm$ 0.6 | 38.6 $\pm$ 0.1 | 26.5 $\pm$ 0.5 |
| 0000e  | 18.4 $\pm$ 0.1 | 13.3 $\pm$ 0.1 | 31.4 $\pm$ 0.1 | 38.7 $\pm$ 1.3 | 26.8 $\pm$ 0.1 |
| 0000d  | 19.1 $\pm$ 0.7 | 13.0 $\pm$ 0.2 | 29.7 $\pm$ 0.3 | 38.8 $\pm$ 0.5 | 26.0 $\pm$ 0.4 |
| 0000c  | 18.8 $\pm$ 0.2 | 13.3 $\pm$ 0.1 | 30.6 $\pm$ 0.2 | 38.5 $\pm$ 0.2 | 26.6 $\pm$ 0.3 |
| 0000b  | 18.9 $\pm$ 0.5 | 13.1 $\pm$ 0.0 | 28.9 $\pm$ 0.2 | 37.8 $\pm$ 0.9 | 25.0 $\pm$ 0.1 |
| 0000a  | 19.4 $\pm$ 0.2 | 13.0 $\pm$ 0.1 | 28.7 $\pm$ 0.0 | 38.9 $\pm$ 0.1 | 25.0 $\pm$ 0.0 |
| 0011   | 17.7 $\pm$ 0.3 | 13.3 $\pm$ 0.1 | 30.6 $\pm$ 0.3 | 36.5 $\pm$ 0.2 | 26.3 $\pm$ 0.2 |
| 0010   | 17.1 $\pm$ 0.5 | 13.5 $\pm$ 0.1 | 30.5 $\pm$ 0.1 | 38.7 $\pm$ 0.1 | 25.9 $\pm$ 0.2 |
| 0001   | 19.2 $\pm$ 0.1 | 13.0 $\pm$ 0.0 | 28.4 $\pm$ 0.1 | 36.7 $\pm$ 0.4 | 24.8 $\pm$ 0.1 |
| 0000   | 18.6 $\pm$ 0.5 | 13.1 $\pm$ 0.1 | 28.9 $\pm$ 0.4 | 38.2 $\pm$ 0.1 | 25.1 $\pm$ 0.2 |
| 0100f  | 17.7 $\pm$ 0.8 | 13.7 $\pm$ 0.0 | 30.7 $\pm$ 0.5 | 38.1 $\pm$ 0.2 | 26.0 $\pm$ 0.5 |
| 0100e  | 18.3 $\pm$ 0.5 | 13.1 $\pm$ 0.0 | 31.0 $\pm$ 0.1 | 38.5 $\pm$ 0.2 | 26.5 $\pm$ 0.2 |
| 0100d  | 19.7 $\pm$ 0.7 | 13.5 $\pm$ 0.3 | 29.5 $\pm$ 0.5 | 38.6 $\pm$ 0.0 | 25.6 $\pm$ 0.1 |
| 0100c  | 18.0 $\pm$ 0.6 | 13.1 $\pm$ 0.1 | 30.5 $\pm$ 0.2 | 38.8 $\pm$ 0.4 | 26.1 $\pm$ 0.3 |
| 0100b  | 18.8 $\pm$ 0.1 | 12.8 $\pm$ 0.0 | 28.6 $\pm$ 0.2 | 37.9 $\pm$ 0.7 | 25.0 $\pm$ 0.3 |
| 0100a  | 18.9 $\pm$ 0.0 | 12.8 $\pm$ 0.1 | 28.6 $\pm$ 0.1 | 38.8 $\pm$ 0.1 | 24.8 $\pm$ 0.1 |
| 0111   | 18.3 $\pm$ 0.7 | 13.3 $\pm$ 0.2 | 30.2 $\pm$ 0.1 | 37.5 $\pm$ 0.2 | 25.9 $\pm$ 0.3 |
| 0110   | 17.8 $\pm$ 0.2 | 13.1 $\pm$ 0.0 | 30.7 $\pm$ 0.2 | 38.8 $\pm$ 0.2 | 26.3 $\pm$ 0.2 |
| 0101   | 18.6 $\pm$ 0.2 | 13.0 $\pm$ 0.1 | 28.9 $\pm$ 0.3 | 36.9 $\pm$ 0.1 | 24.9 $\pm$ 0.1 |
| 0100   | 18.9 $\pm$ 0.6 | 12.9 $\pm$ 0.0 | 28.7 $\pm$ 0.2 | 38.3 $\pm$ 0.2 | 24.9 $\pm$ 0.1 |
| 1000f  | 17.5 $\pm$ 0.4 | 13.7 $\pm$ 0.1 | 31.1 $\pm$ 0.1 | 38.4 $\pm$ 0.0 | 26.5 $\pm$ 0.1 |
| 1000e  | 17.8 $\pm$ 0.3 | 13.6 $\pm$ 0.0 | 30.7 $\pm$ 0.6 | 38.6 $\pm$ 0.4 | 26.2 $\pm$ 0.5 |
| 1000d  | 19.5 $\pm$ 0.5 | 13.5 $\pm$ 0.2 | 29.3 $\pm$ 0.2 | 38.8 $\pm$ 0.5 | 25.6 $\pm$ 0.2 |
| 1000c  | 18.1 $\pm$ 0.6 | 13.3 $\pm$ 0.2 | 30.1 $\pm$ 0.5 | 39.1 $\pm$ 0.4 | 25.9 $\pm$ 0.1 |
| 1000b  | 18.4 $\pm$ 0.6 | 13.2 $\pm$ 0.1 | 29.0 $\pm$ 0.4 | 37.0 $\pm$ 0.9 | 25.2 $\pm$ 0.2 |
| 1000a  | 18.9 $\pm$ 0.3 | 13.3 $\pm$ 0.2 | 28.9 $\pm$ 0.4 | 38.6 $\pm$ 0.1 | 25.1 $\pm$ 0.2 |
| 1011   | 17.2 $\pm$ 0.3 | 13.3 $\pm$ 0.1 | 29.9 $\pm$ 0.2 | 36.7 $\pm$ 0.6 | 25.6 $\pm$ 0.3 |
| 1010   | 18.2 $\pm$ 0.6 | 13.4 $\pm$ 0.2 | 30.6 $\pm$ 0.2 | 38.3 $\pm$ 0.2 | 26.4 $\pm$ 0.1 |
| 1001   | 18.7 $\pm$ 0.6 | 13.1 $\pm$ 0.0 | 28.7 $\pm$ 0.4 | 36.6 $\pm$ 0.2 | 25.1 $\pm$ 0.2 |
| 1000   | 18.2 $\pm$ 0.2 | 13.3 $\pm$ 0.1 | 29.0 $\pm$ 0.4 | 38.6 $\pm$ 0.8 | 25.2 $\pm$ 0.3 |
| 1100f  | 16.9 $\pm$ 0.1 | 13.5 $\pm$ 0.2 | 31.2 $\pm$ 0.2 | 38.5 $\pm$ 0.2 | 26.2 $\pm$ 0.3 |
| 1100e  | 18.0 $\pm$ 0.2 | 13.1 $\pm$ 0.3 | 31.0 $\pm$ 0.2 | 38.2 $\pm$ 0.9 | 26.5 $\pm$ 0.2 |
| 1100d  | 20.6 $\pm$ 1.3 | 13.5 $\pm$ 0.1 | 29.2 $\pm$ 0.5 | 39.0 $\pm$ 0.1 | 26.0 $\pm$ 0.2 |
| 1100c  | 18.1 $\pm$ 0.2 | 12.8 $\pm$ 0.1 | 29.4 $\pm$ 0.3 | 38.3 $\pm$ 0.2 | 25.4 $\pm$ 0.3 |
| 1100b  | 19.1 $\pm$ 0.2 | 13.0 $\pm$ 0.1 | 28.5 $\pm$ 0.1 | 37.1 $\pm$ 0.8 | 25.0 $\pm$ 0.2 |
| 1100a  | 19.1 $\pm$ 0.3 | 12.8 $\pm$ 0.1 | 28.5 $\pm$ 0.2 | 38.8 $\pm$ 0.2 | 24.9 $\pm$ 0.1 |
| 1111   | 17.9 $\pm$ 0.7 | 13.1 $\pm$ 0.1 | 30.3 $\pm$ 0.2 | 37.1 $\pm$ 0.5 | 26.0 $\pm$ 0.1 |
| 1110   | 18.4 $\pm$ 0.6 | 13.3 $\pm$ 0.3 | 30.6 $\pm$ 0.1 | 38.1 $\pm$ 0.5 | 26.5 $\pm$ 0.0 |
| 1101   | 18.3 $\pm$ 0.6 | 12.9 $\pm$ 0.1 | 28.9 $\pm$ 0.4 | 37.6 $\pm$ 1.1 | 25.0 $\pm$ 0.1 |
| 1100   | 18.4 $\pm$ 0.6 | 12.8 $\pm$ 0.1 | 28.6 $\pm$ 0.2 | 38.0 $\pm$ 0.3 | 24.9 $\pm$ 0.2 |

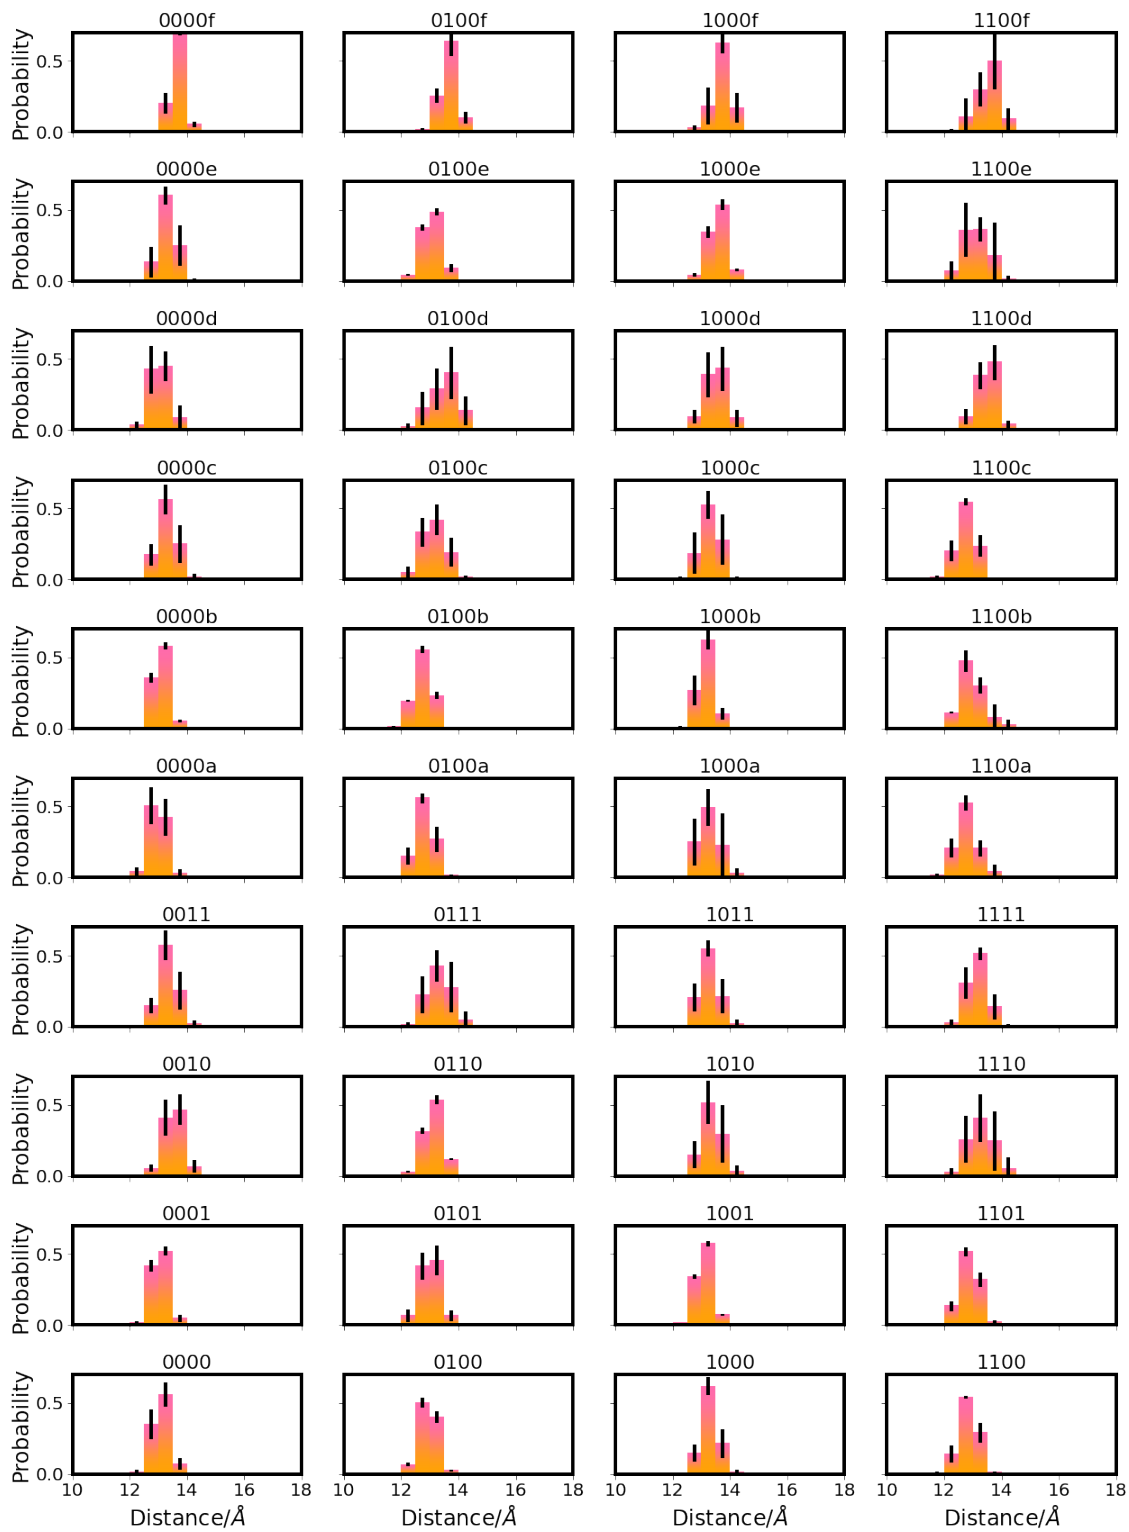

Figure S17: Distribution of distances between E286 and Y288 in different protonation models of CcO.

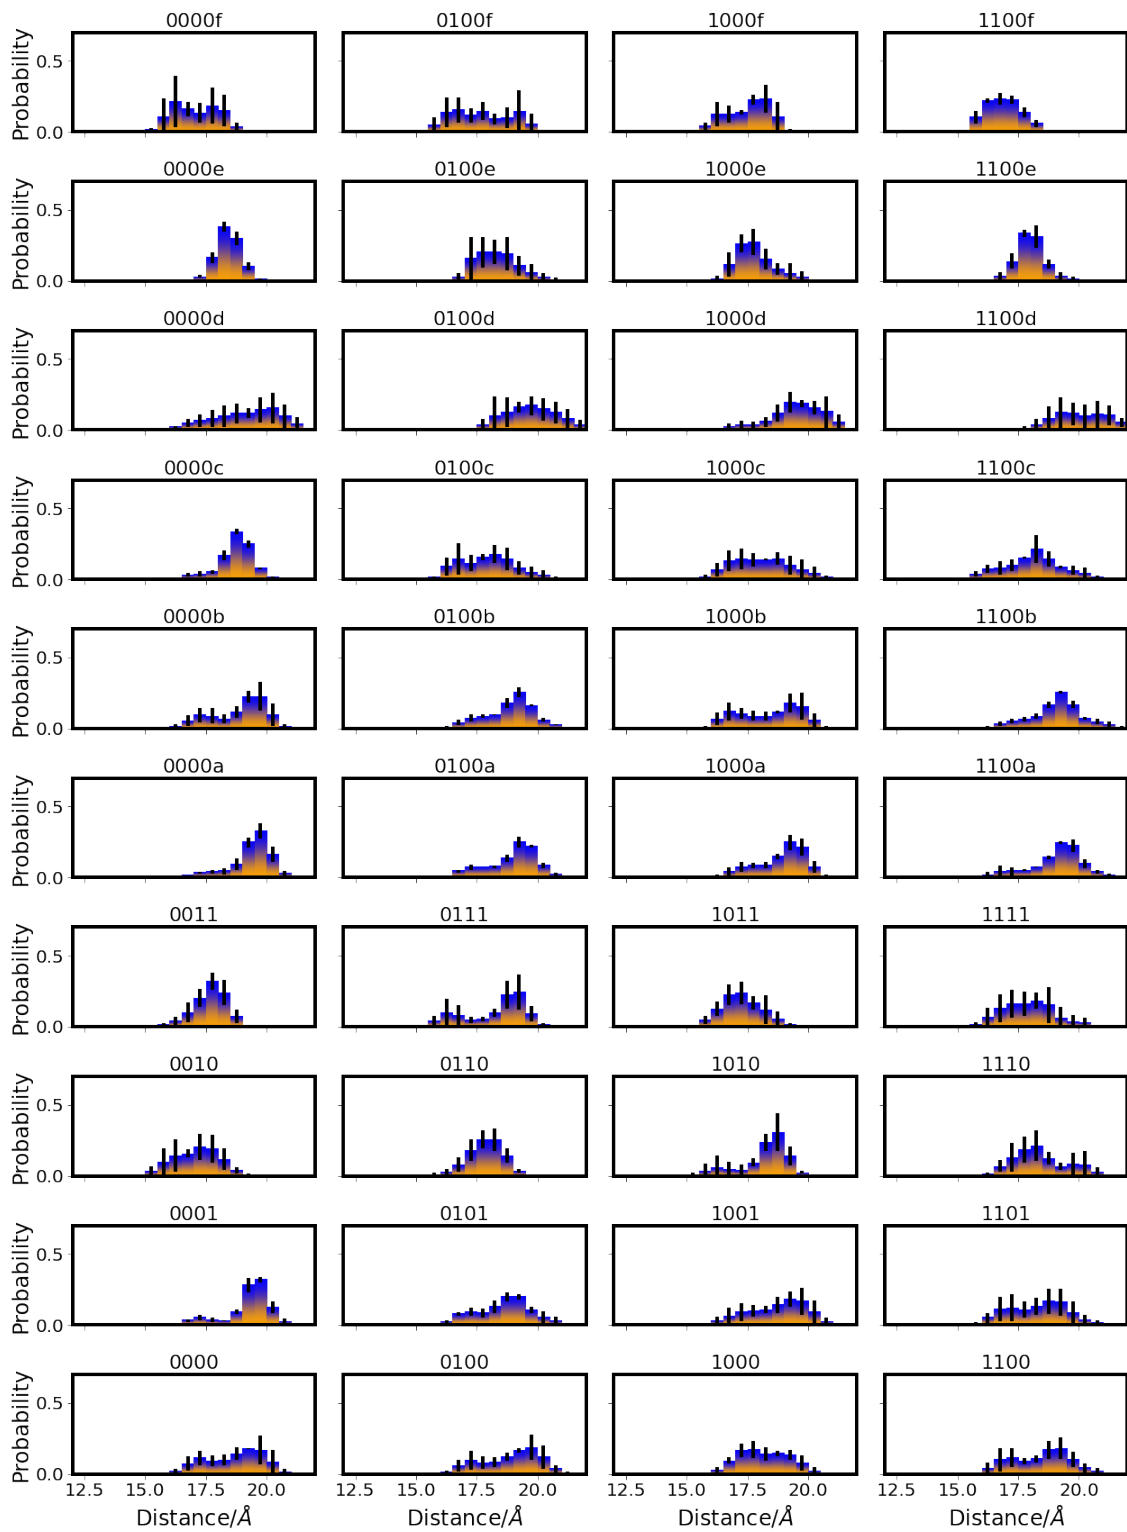

Figure S18: Distribution of distances between E286 and K362 in different protonation models of CcO.

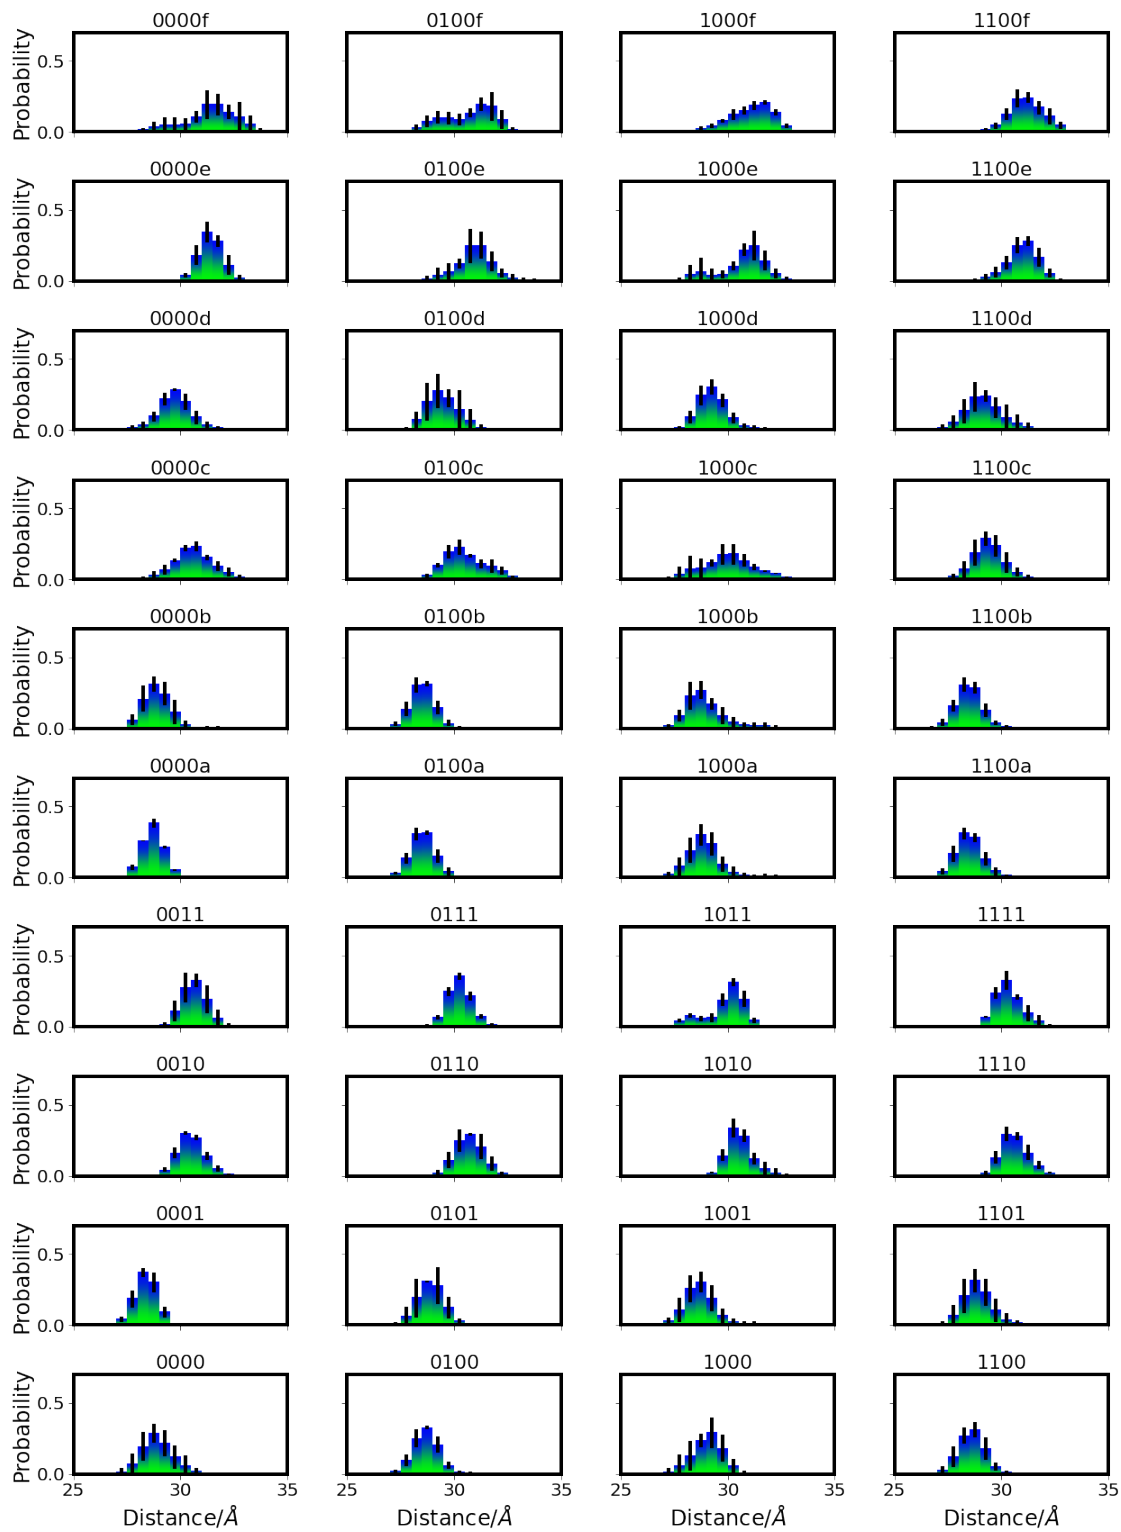

Figure S19: Distribution of distances between D132 and K362 in different protonation models of CcO.

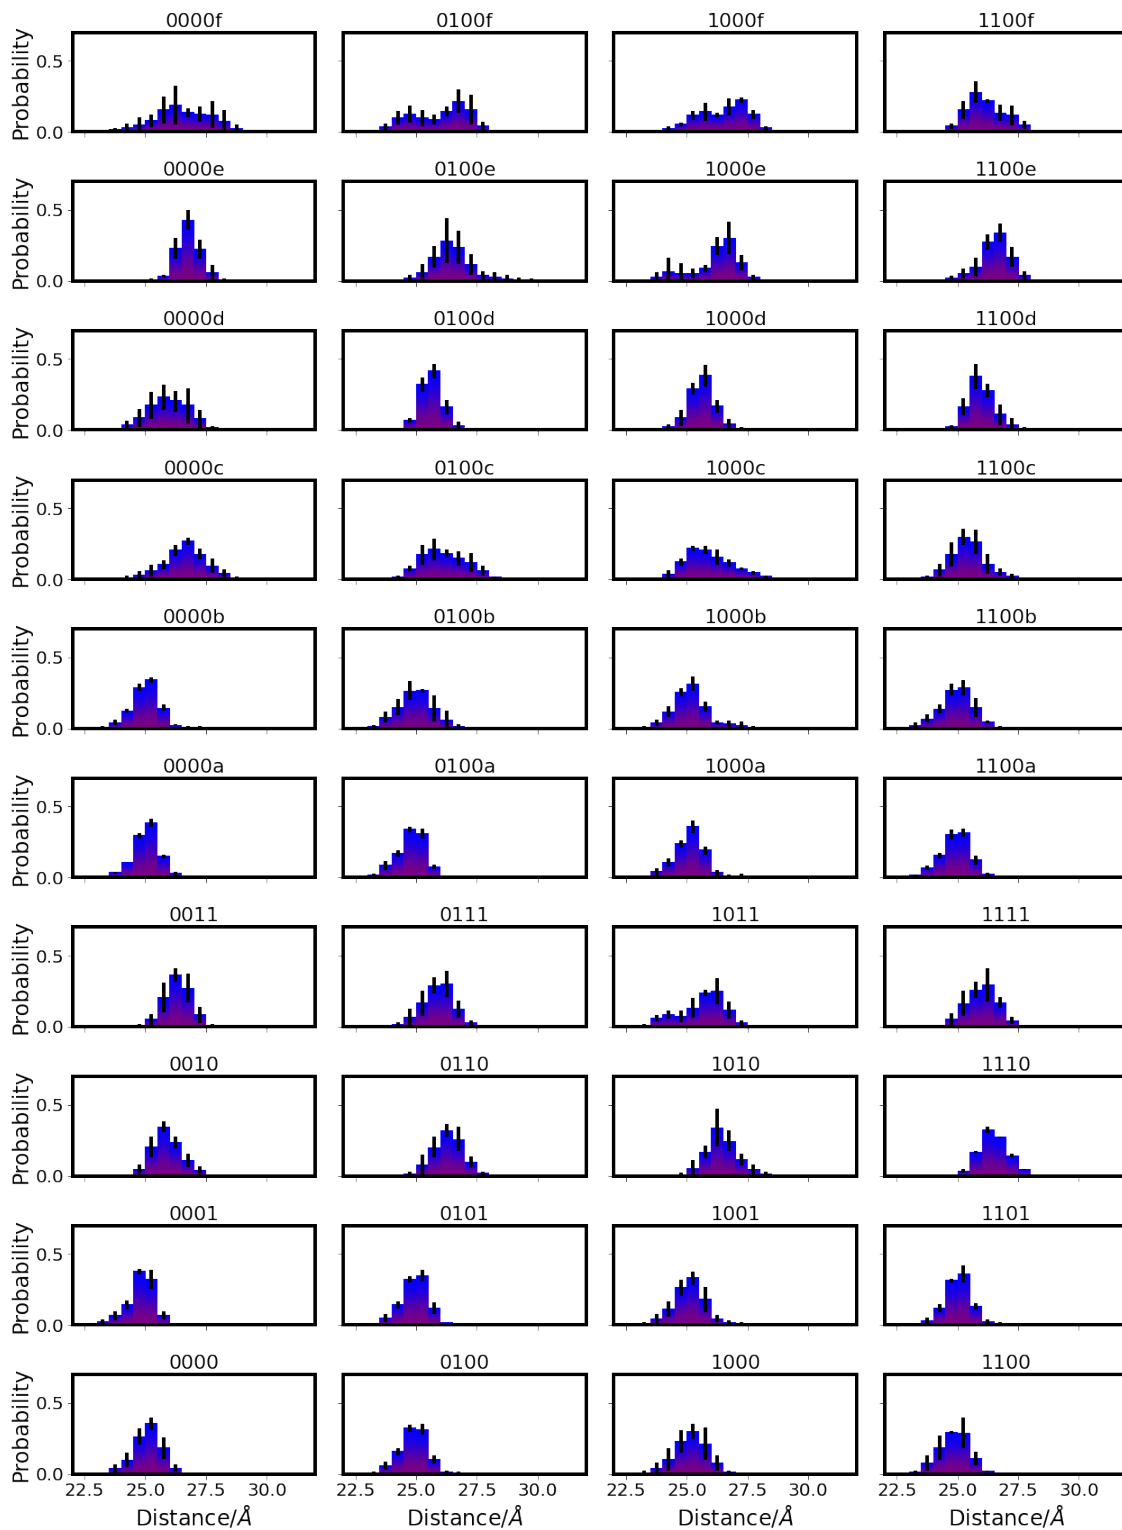

Figure S20: Distribution of distances between N139 and K362 in different protonation models of CcO.

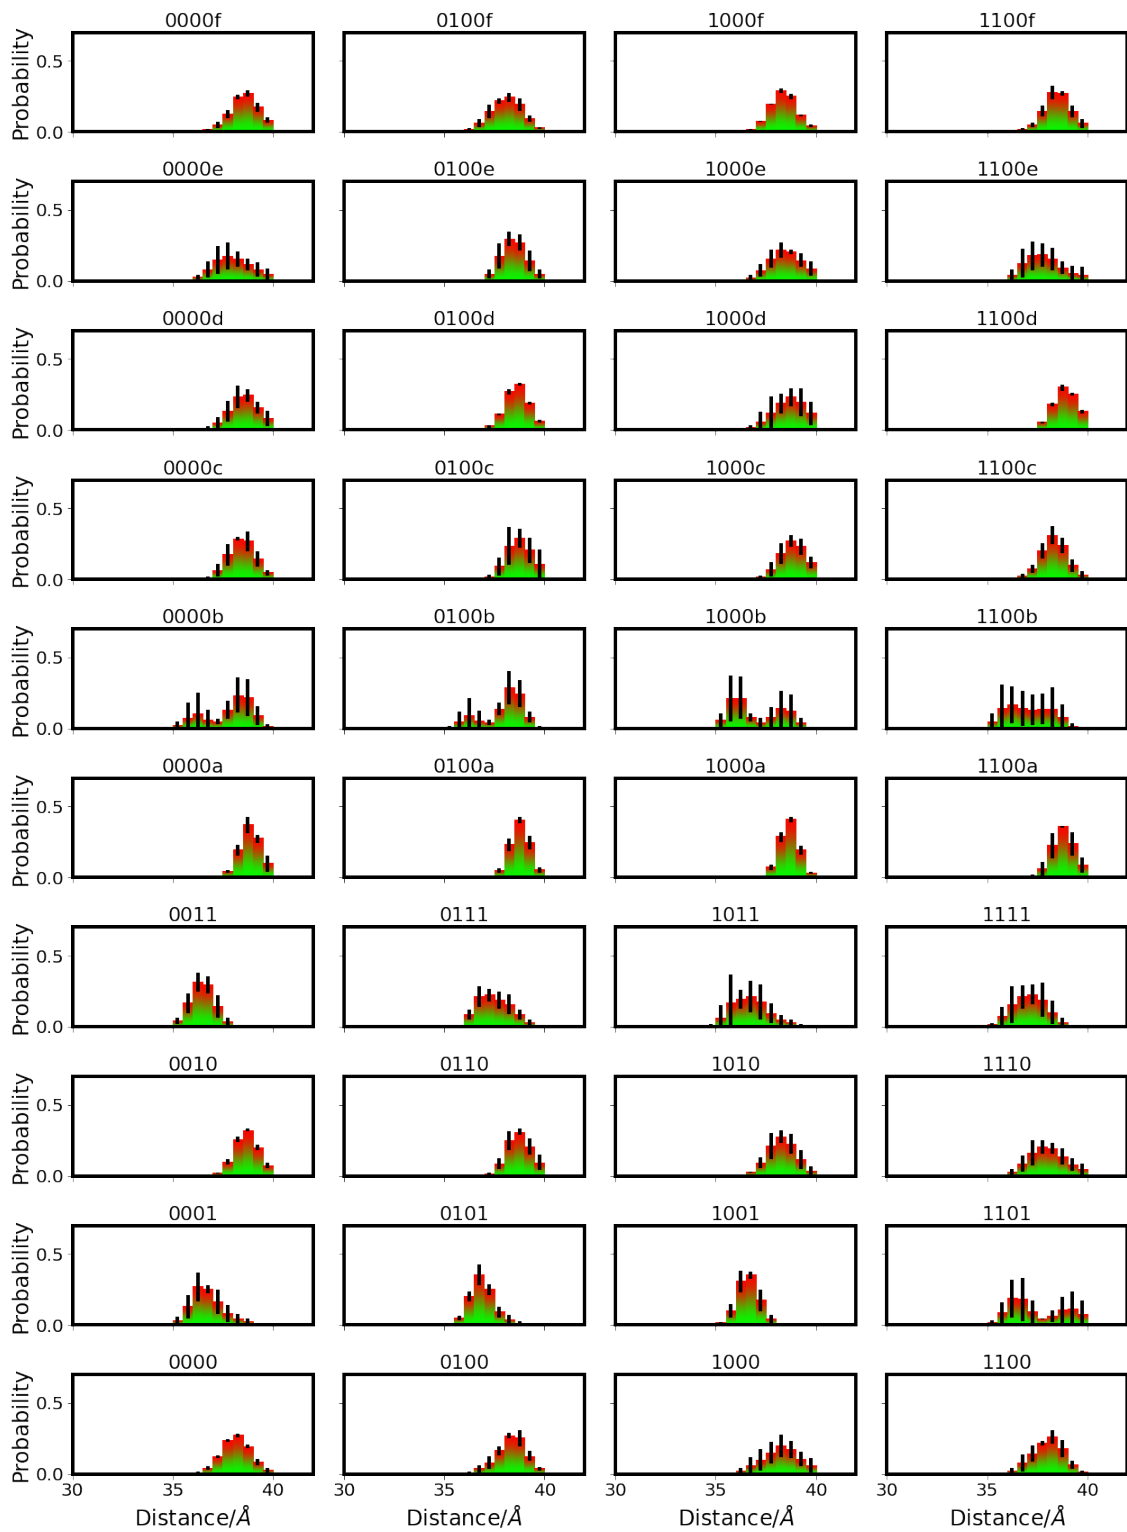

Figure S21: Distribution of distances between D132 and E101 in different protonation models of CcO.

Table S4: Average distances(in Å) between important residues in the K-channel and the H<sub>3</sub>O<sup>+</sup> ion (H3).

| System | H3-Y288    | H3-K362    | H3-E101    | H3-D132    | H3-N139    | H3-E286    |
|--------|------------|------------|------------|------------|------------|------------|
| 0000f  | 3.2 ± 0.8  | 5.9 ± 0.7  | 19.5 ± 0.2 | 35.1 ± 0.2 | 28.9 ± 0.2 | 15.3 ± 0.1 |
| 0000e  | 9.2 ± 0.1  | 2.8 ± 0.1  | 16.8 ± 1.0 | 33.4 ± 0.1 | 28.3 ± 0.0 | 18.4 ± 0.0 |
| 0000d  | 15.0 ± 0.3 | 3.6 ± 0.7  | 14.3 ± 0.7 | 27.8 ± 0.2 | 24.4 ± 0.3 | 19.8 ± 0.2 |
| 0000c  | 14.7 ± 0.1 | 5.0 ± 0.2  | 8.6 ± 0.2  | 32.7 ± 0.1 | 30.0 ± 0.1 | 23.4 ± 0.1 |
| 0000b  | 18.7 ± 0.1 | 8.4 ± 0.4  | 5.5 ± 1.3  | 33.5 ± 0.1 | 31.6 ± 0.2 | 27.0 ± 0.1 |
| 0000a  | 22.9 ± 0.3 | 12.3 ± 0.2 | 3.2 ± 0.1  | 36.0 ± 0.1 | 35.0 ± 0.1 | 31.3 ± 0.1 |
| 0100f  | 2.6 ± 0.0  | 6.8 ± 0.0  | 19.8 ± 0.2 | 34.8 ± 0.1 | 28.5 ± 0.0 | 15.2 ± 0.1 |
| 0100e  | 9.4 ± 0.2  | 3.1 ± 0.4  | 16.2 ± 0.3 | 33.1 ± 0.1 | 28.1 ± 0.1 | 18.2 ± 0.1 |
| 0100d  | 14.4 ± 0.5 | 3.5 ± 1.1  | 14.7 ± 0.1 | 27.1 ± 0.1 | 23.8 ± 0.1 | 20.1 ± 0.7 |
| 0100c  | 14.7 ± 0.3 | 5.8 ± 0.3  | 9.0 ± 0.3  | 32.5 ± 0.2 | 29.7 ± 0.2 | 23.5 ± 0.2 |
| 0100b  | 18.8 ± 0.1 | 8.5 ± 0.1  | 4.9 ± 0.9  | 34.0 ± 0.1 | 32.1 ± 0.3 | 27.0 ± 0.1 |
| 0100a  | 23.0 ± 0.1 | 12.7 ± 0.1 | 3.1 ± 0.0  | 36.0 ± 0.0 | 35.0 ± 0.1 | 31.3 ± 0.1 |
| 1000f  | 3.4 ± 0.8  | 6.1 ± 0.5  | 19.7 ± 0.2 | 34.8 ± 0.4 | 28.7 ± 0.3 | 15.4 ± 0.0 |
| 1000e  | 9.1 ± 0.2  | 3.2 ± 0.5  | 16.0 ± 0.5 | 33.2 ± 0.2 | 28.3 ± 0.1 | 18.5 ± 0.1 |
| 1000d  | 15.1 ± 0.2 | 2.9 ± 0.2  | 14.8 ± 0.2 | 27.1 ± 0.1 | 23.8 ± 0.1 | 19.3 ± 0.1 |
| 1000c  | 14.7 ± 0.3 | 6.2 ± 0.2  | 8.5 ± 0.2  | 33.4 ± 0.7 | 30.5 ± 0.6 | 23.5 ± 0.1 |
| 1000b  | 18.6 ± 0.1 | 8.8 ± 0.5  | 4.2 ± 0.8  | 33.6 ± 0.3 | 31.9 ± 0.2 | 27.0 ± 0.0 |
| 1000a  | 23.0 ± 0.4 | 12.6 ± 0.3 | 3.1 ± 0.1  | 35.8 ± 0.1 | 34.9 ± 0.0 | 31.1 ± 0.1 |
| 1100f  | 3.1 ± 0.6  | 5.4 ± 0.2  | 19.3 ± 0.3 | 34.8 ± 0.1 | 28.5 ± 0.1 | 15.1 ± 0.2 |
| 1100e  | 9.0 ± 0.3  | 3.2 ± 0.3  | 16.3 ± 0.5 | 33.1 ± 0.3 | 28.2 ± 0.2 | 18.1 ± 0.3 |
| 1100d  | 13.5 ± 0.8 | 2.8 ± 0.2  | 14.5 ± 0.6 | 27.6 ± 0.6 | 24.6 ± 0.5 | 20.1 ± 0.7 |
| 1100c  | 14.9 ± 0.0 | 6.0 ± 0.4  | 8.2 ± 0.2  | 32.9 ± 0.1 | 30.2 ± 0.2 | 23.7 ± 0.2 |
| 1100b  | 18.1 ± 0.2 | 8.7 ± 0.3  | 3.5 ± 0.6  | 34.1 ± 0.5 | 32.3 ± 0.3 | 27.1 ± 0.0 |
| 1100a  | 22.7 ± 0.3 | 12.7 ± 0.3 | 3.1 ± 0.0  | 36.0 ± 0.2 | 35.2 ± 0.2 | 31.3 ± 0.1 |



Table S5: Average distances(in Å) defining the width of the K-channel

| System | P358-A319 | M316-K365 | P315-E101  | P315-S365  |
|--------|-----------|-----------|------------|------------|
| 0000f  | 5.7 ± 0.3 | 6.4 ± 0.2 | 5.8 ± 0.3  | 6.3 ± 0.2  |
| 0000e  | 5.2 ± 0.1 | 6.7 ± 0.2 | 5.6 ± 0.3  | 6.2 ± 0.3  |
| 0000d  | 6.3 ± 0.4 | 7.8 ± 0.4 | 6.1 ± 0.4  | 7.0 ± 0.7  |
| 0000c  | 6.2 ± 0.2 | 7.6 ± 0.0 | 5.4 ± 0.0  | 6.7 ± 0.2  |
| 0000b  | 5.5 ± 0.1 | 6.8 ± 0.1 | 5.1 ± 0.0  | 6.5 ± 0.1  |
| 0000a  | 5.3 ± 0.1 | 6.6 ± 0.1 | 5.3 ± 0.1  | 6.5 ± 0.1  |
| 0011   | 5.1 ± 0.0 | 6.5 ± 0.0 | 8.4 ± 0.2  | 9.2 ± 0.1  |
| 0010   | 6.9 ± 0.3 | 7.4 ± 0.4 | 10.7 ± 0.2 | 10.1 ± 0.3 |
| 0001   | 5.2 ± 0.0 | 6.6 ± 0.0 | 9.1 ± 0.4  | 9.4 ± 0.0  |
| 0000   | 5.2 ± 0.2 | 6.4 ± 0.3 | 9.4 ± 0.7  | 9.1 ± 0.3  |
| 0100f  | 5.4 ± 0.0 | 6.3 ± 0.1 | 5.4 ± 0.0  | 6.3 ± 0.1  |
| 0100e  | 5.5 ± 0.1 | 6.8 ± 0.2 | 5.5 ± 0.1  | 6.8 ± 0.2  |
| 0100d  | 6.3 ± 0.3 | 7.4 ± 0.2 | 6.3 ± 0.3  | 7.4 ± 0.2  |
| 0100c  | 6.5 ± 0.7 | 7.6 ± 0.2 | 6.5 ± 0.7  | 7.6 ± 0.2  |
| 0100b  | 5.3 ± 0.1 | 6.7 ± 0.1 | 5.3 ± 0.1  | 6.7 ± 0.1  |
| 0100a  | 5.3 ± 0.1 | 6.6 ± 0.0 | 5.3 ± 0.1  | 6.6 ± 0.0  |
| 0111   | 5.9 ± 0.2 | 7.1 ± 0.4 | 9.3 ± 0.4  | 9.6 ± 0.1  |
| 0110   | 7.2 ± 0.3 | 7.9 ± 0.3 | 11.0 ± 0.2 | 10.4 ± 0.3 |
| 0101   | 5.2 ± 0.1 | 6.7 ± 0.1 | 8.7 ± 0.1  | 9.2 ± 0.2  |
| 0100   | 5.3 ± 0.1 | 6.6 ± 0.1 | 9.9 ± 0.2  | 9.3 ± 0.1  |
| 1000f  | 5.6 ± 0.0 | 6.4 ± 0.1 | 5.6 ± 0.0  | 6.4 ± 0.1  |
| 1000e  | 5.4 ± 0.2 | 6.2 ± 0.2 | 5.4 ± 0.2  | 6.2 ± 0.2  |
| 1000d  | 6.4 ± 0.7 | 7.5 ± 0.3 | 6.4 ± 0.7  | 7.5 ± 0.3  |
| 1000c  | 7.3 ± 0.6 | 7.9 ± 0.2 | 7.3 ± 0.6  | 7.9 ± 0.2  |
| 1000b  | 5.2 ± 0.1 | 6.6 ± 0.0 | 5.2 ± 0.1  | 6.6 ± 0.0  |
| 1000a  | 5.4 ± 0.0 | 6.7 ± 0.1 | 5.4 ± 0.0  | 6.7 ± 0.1  |
| 1011   | 5.2 ± 0.1 | 6.5 ± 0.1 | 8.7 ± 0.4  | 9.4 ± 0.0  |
| 1010   | 6.5 ± 0.5 | 7.7 ± 0.1 | 10.4 ± 0.2 | 10.0 ± 0.2 |
| 1001   | 5.1 ± 0.0 | 6.6 ± 0.0 | 8.7 ± 0.2  | 9.2 ± 0.0  |
| 1000   | 5.3 ± 0.2 | 6.6 ± 0.3 | 10.3 ± 0.8 | 9.3 ± 0.2  |
| 1100f  | 5.8 ± 0.2 | 6.3 ± 0.2 | 5.8 ± 0.2  | 6.3 ± 0.2  |
| 1100e  | 5.4 ± 0.1 | 6.5 ± 0.3 | 5.4 ± 0.1  | 6.5 ± 0.3  |
| 1100d  | 7.1 ± 0.4 | 8.0 ± 0.5 | 8.0 ± 1.7  | 7.9 ± 0.4  |
| 1100c  | 5.9 ± 0.1 | 7.3 ± 0.1 | 5.9 ± 0.1  | 7.3 ± 0.1  |
| 1100b  | 5.3 ± 0.1 | 6.7 ± 0.2 | 5.3 ± 0.1  | 6.7 ± 0.2  |
| 1100a  | 5.4 ± 0.1 | 6.6 ± 0.1 | 5.4 ± 0.1  | 6.6 ± 0.1  |
| 1111   | 5.4 ± 0.5 | 6.8 ± 0.4 | 8.8 ± 0.7  | 9.2 ± 0.4  |
| 1110   | 6.3 ± 0.9 | 7.7 ± 0.5 | 9.8 ± 0.8  | 9.9 ± 0.5  |
| 1101   | 5.9 ± 1.0 | 6.9 ± 0.4 | 9.7 ± 1.0  | 9.3 ± 0.2  |
| 1100   | 5.3 ± 0.1 | 6.6 ± 0.1 | 9.8 ± 0.2  | 9.3 ± 0.1  |

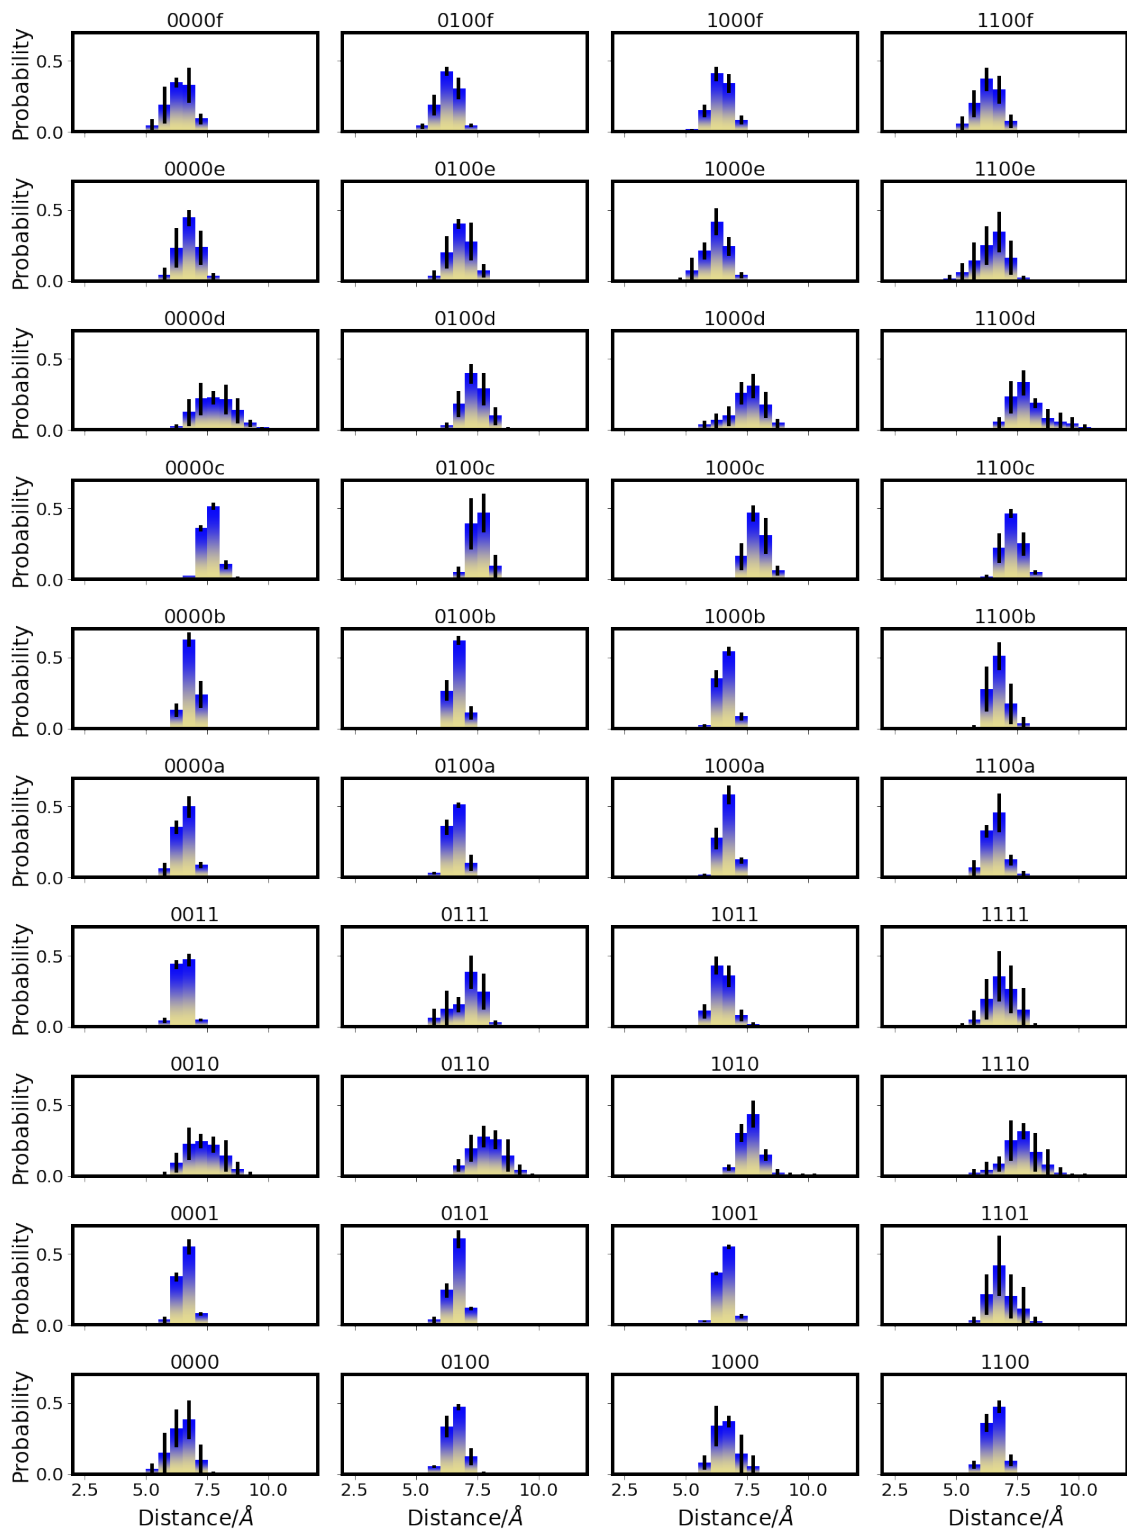

Figure S22: Distribution of distances between M316 and K362 in different protonation models of CcO.

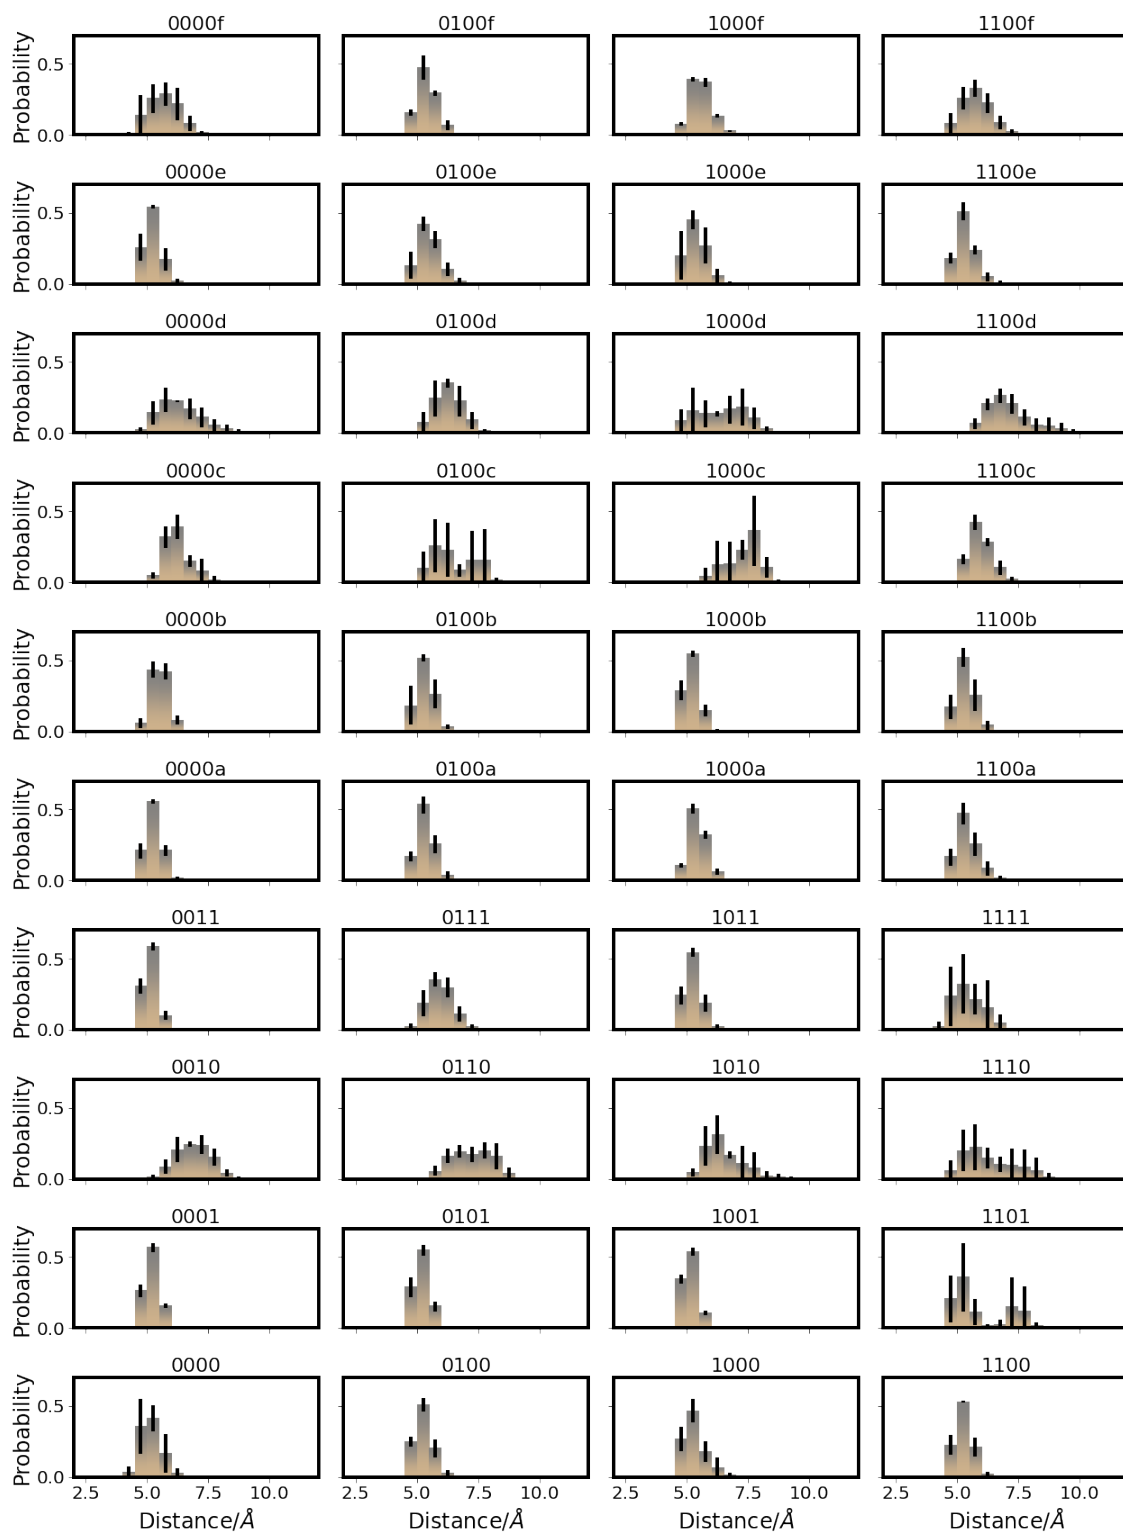

Figure S23: Distribution of distances between P358 and A319 in different protonation models of CcO.

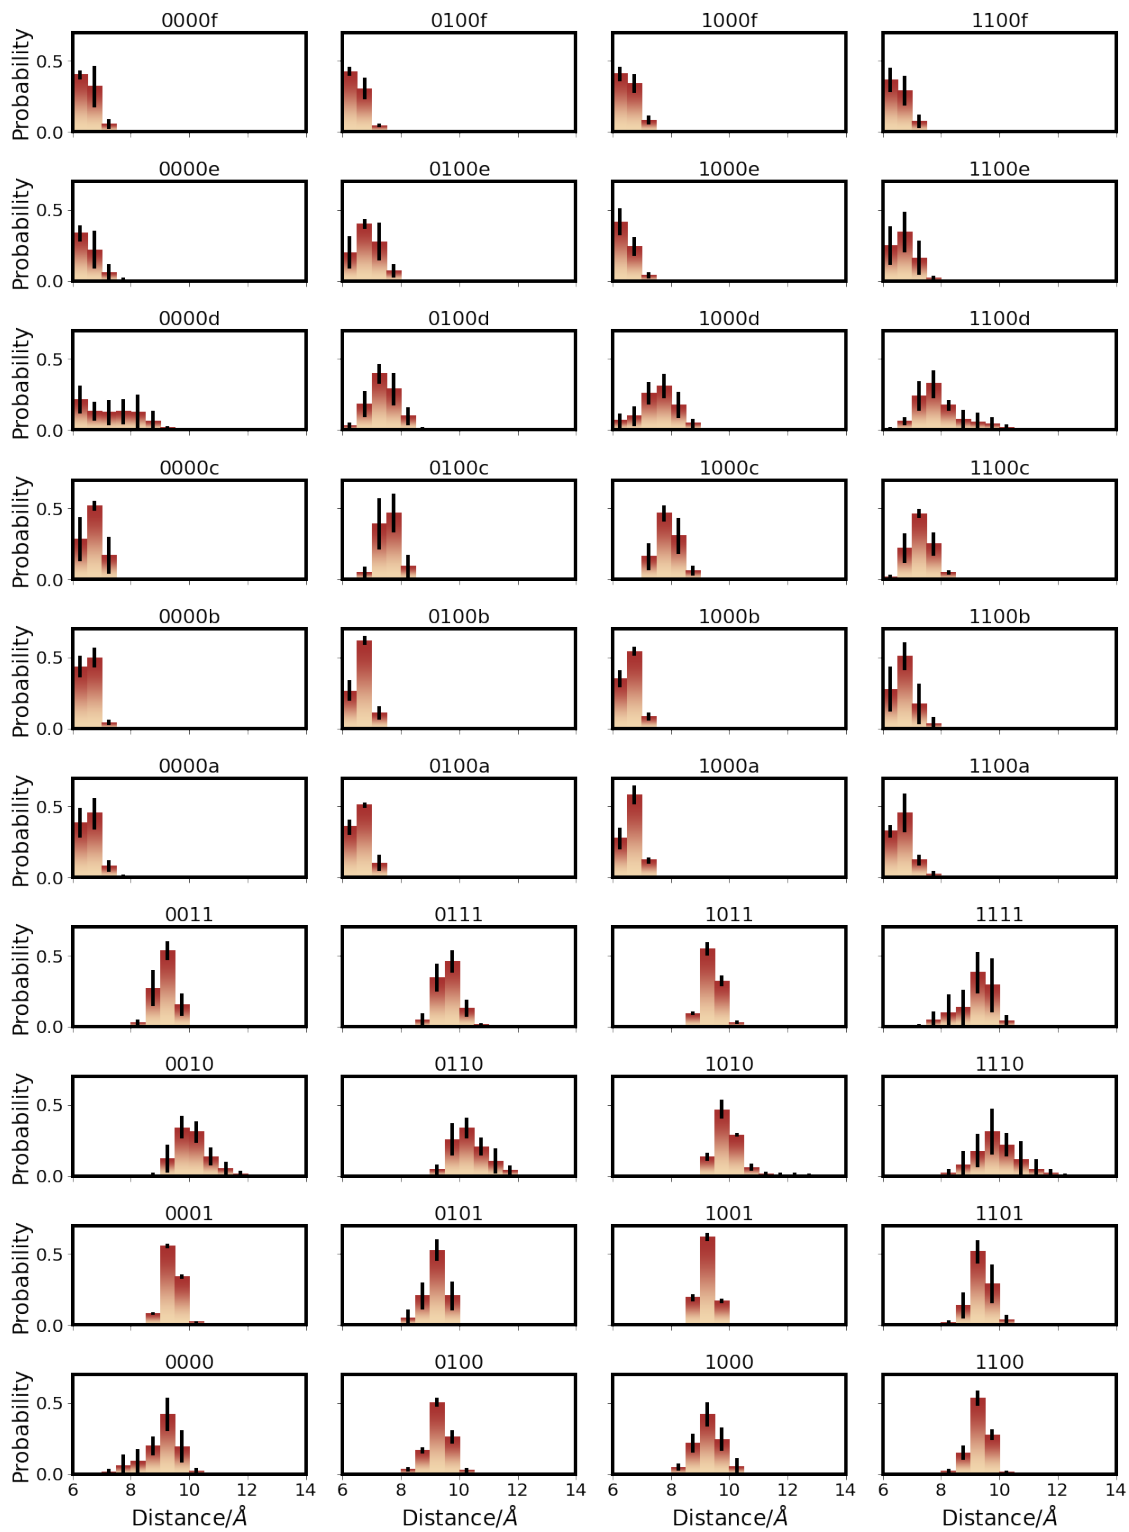

Figure S24: Distribution of distances between P315 and S365 in different protonation models of CcO.

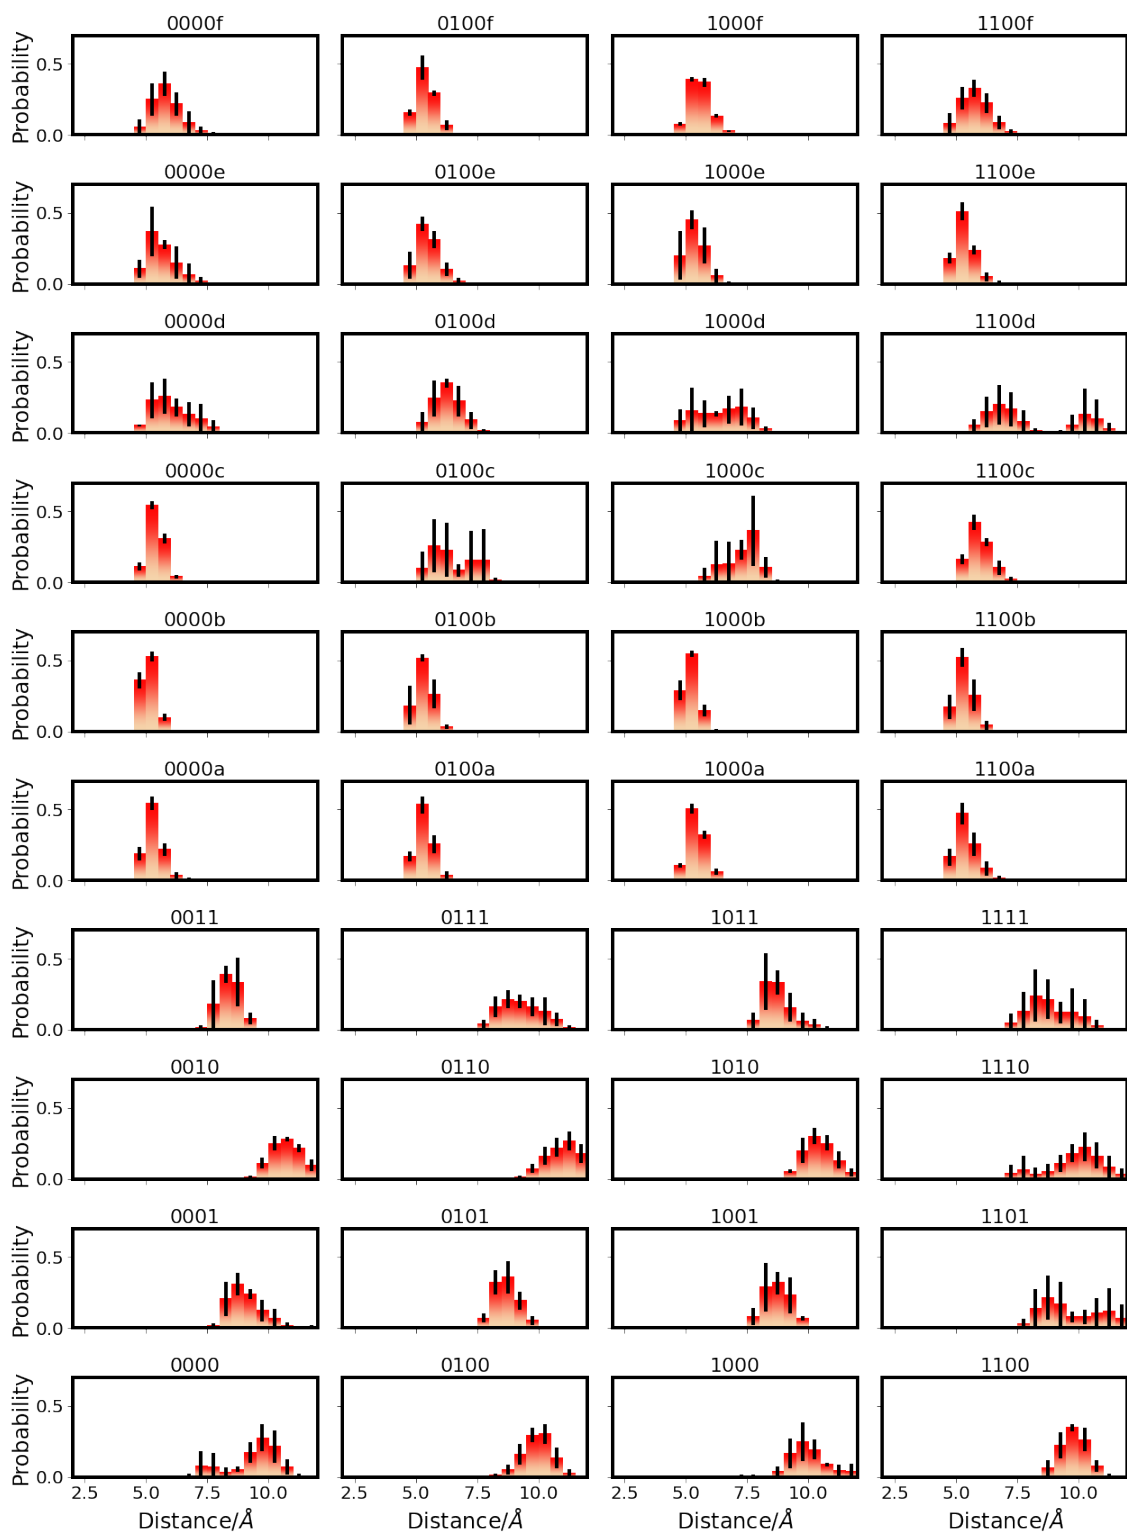

Figure S25: Distribution of distances between P315 and E101 in different protonation models of CcO.

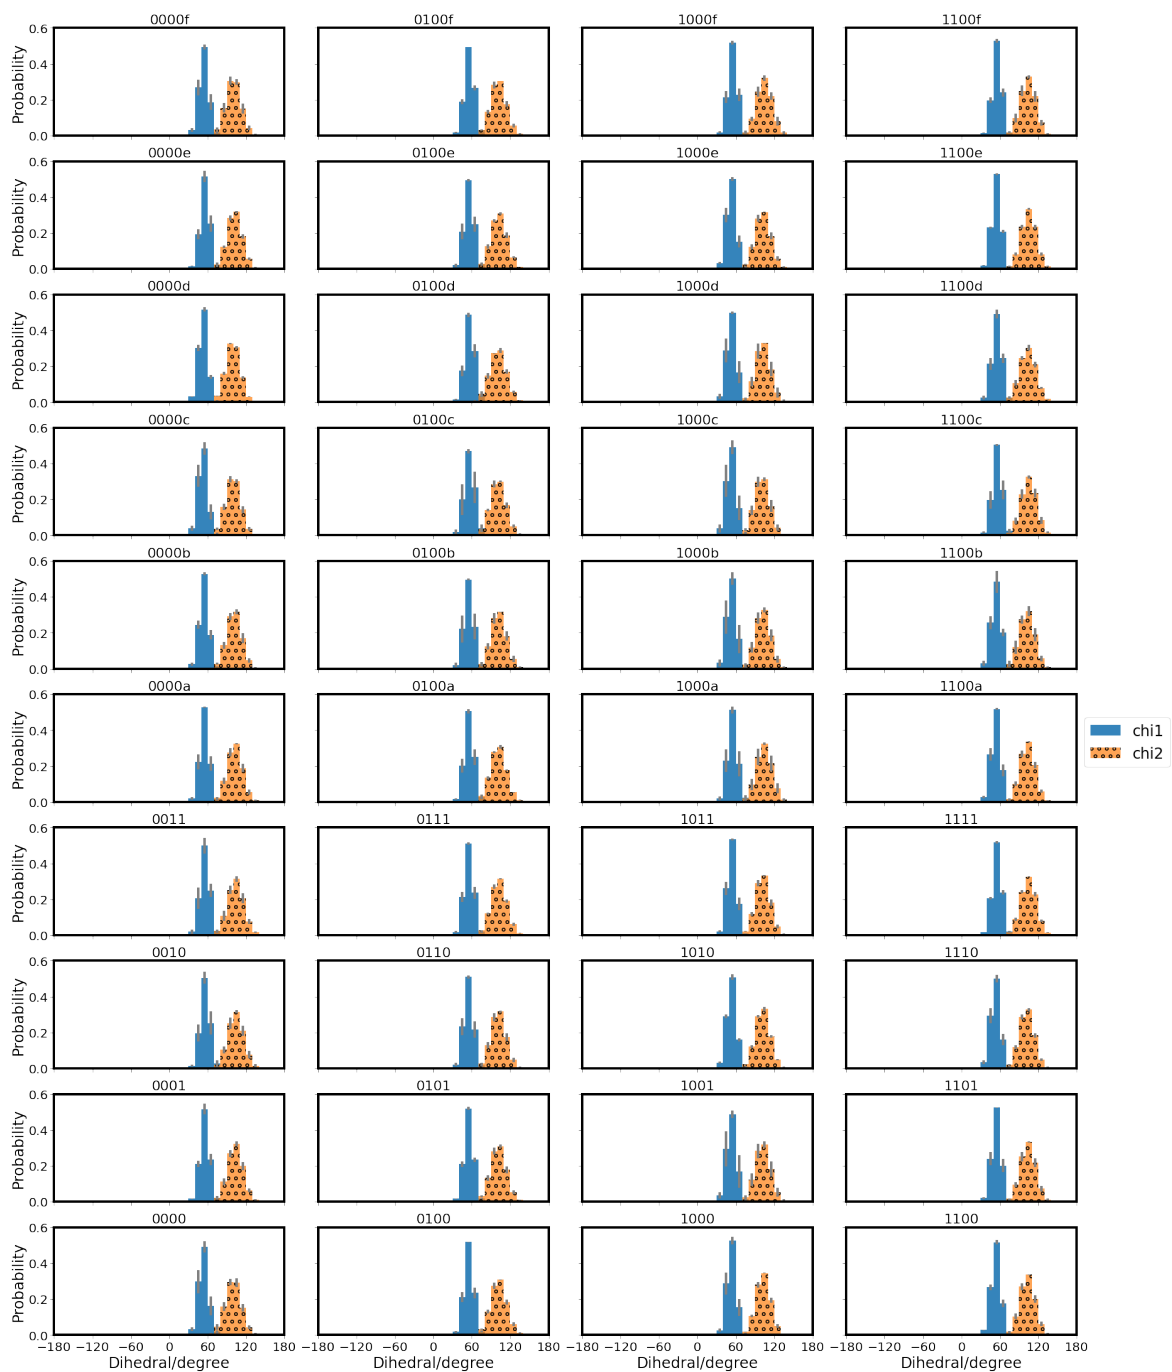

Figure S26: Distribution of side chain dihedral angles of H26 in different protonation models of CcO.

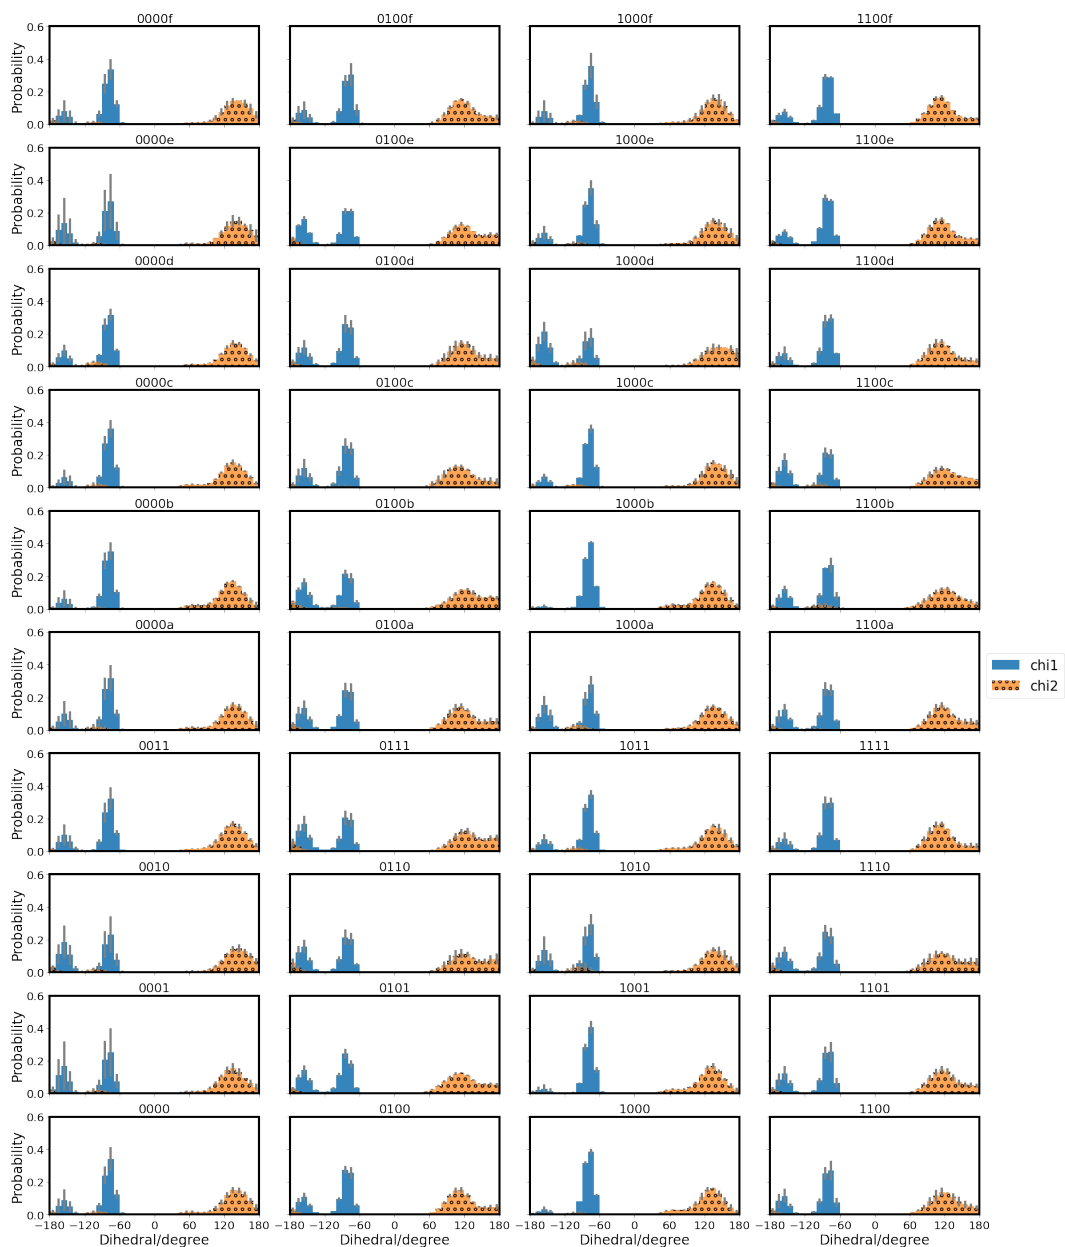

Figure S27: Distribution of side chain dihedral angles of N121 in different protonation models of CcO.

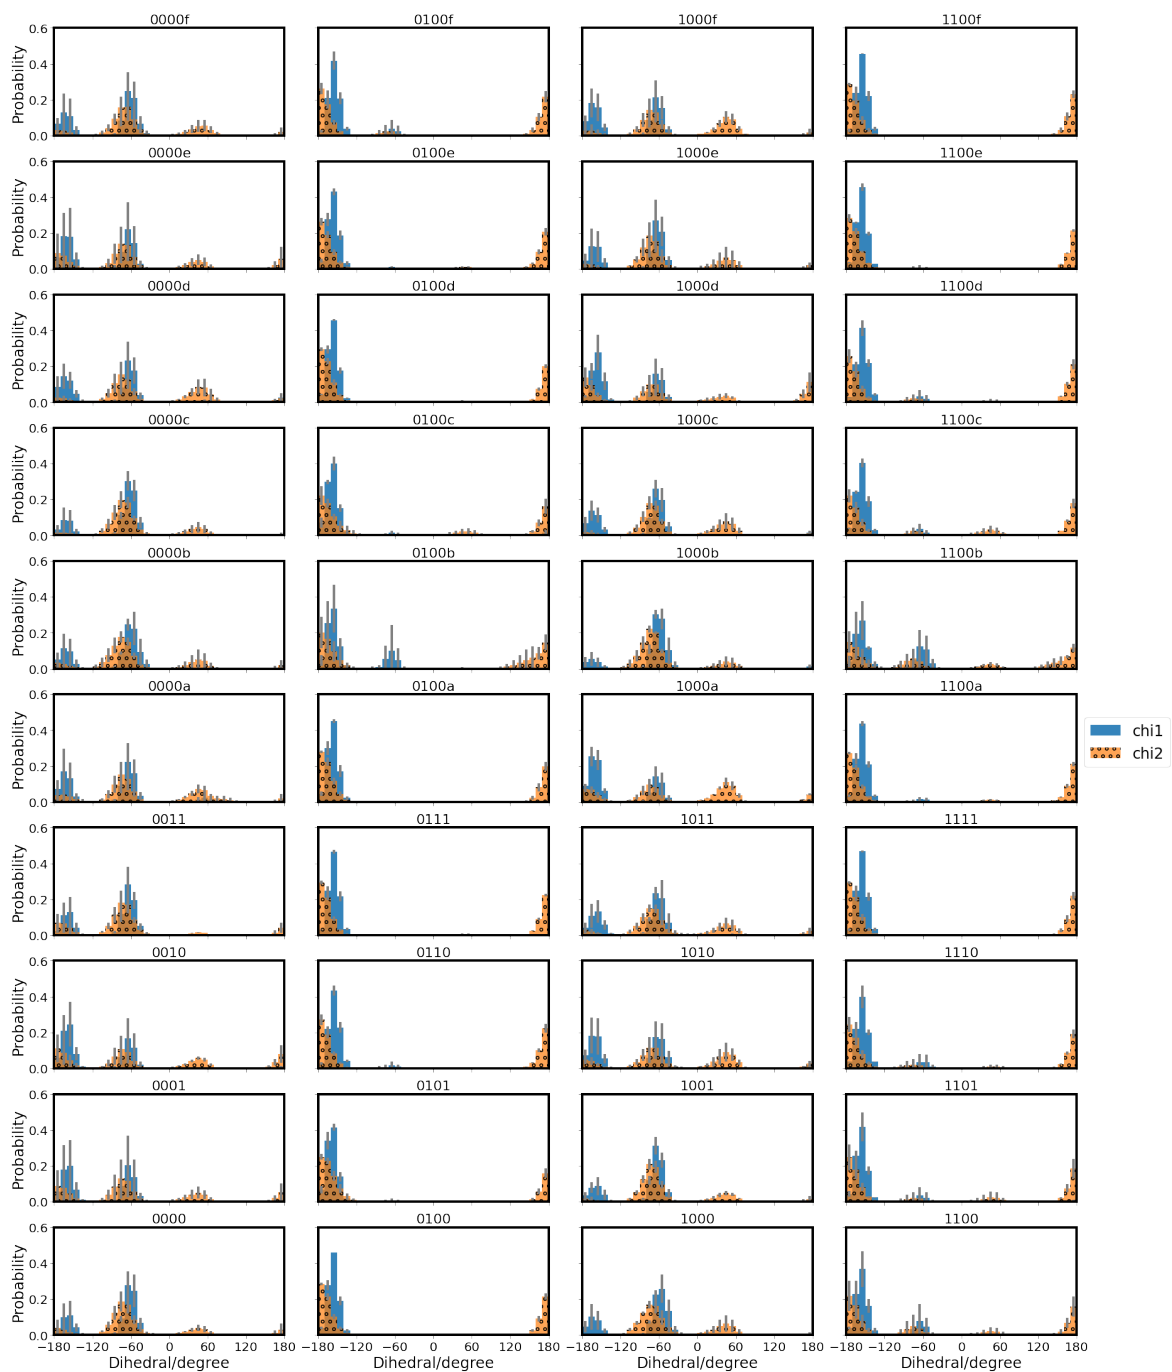

Figure S28: Distribution of side chain dihedral angles of N139 in different protonation models of CcO.



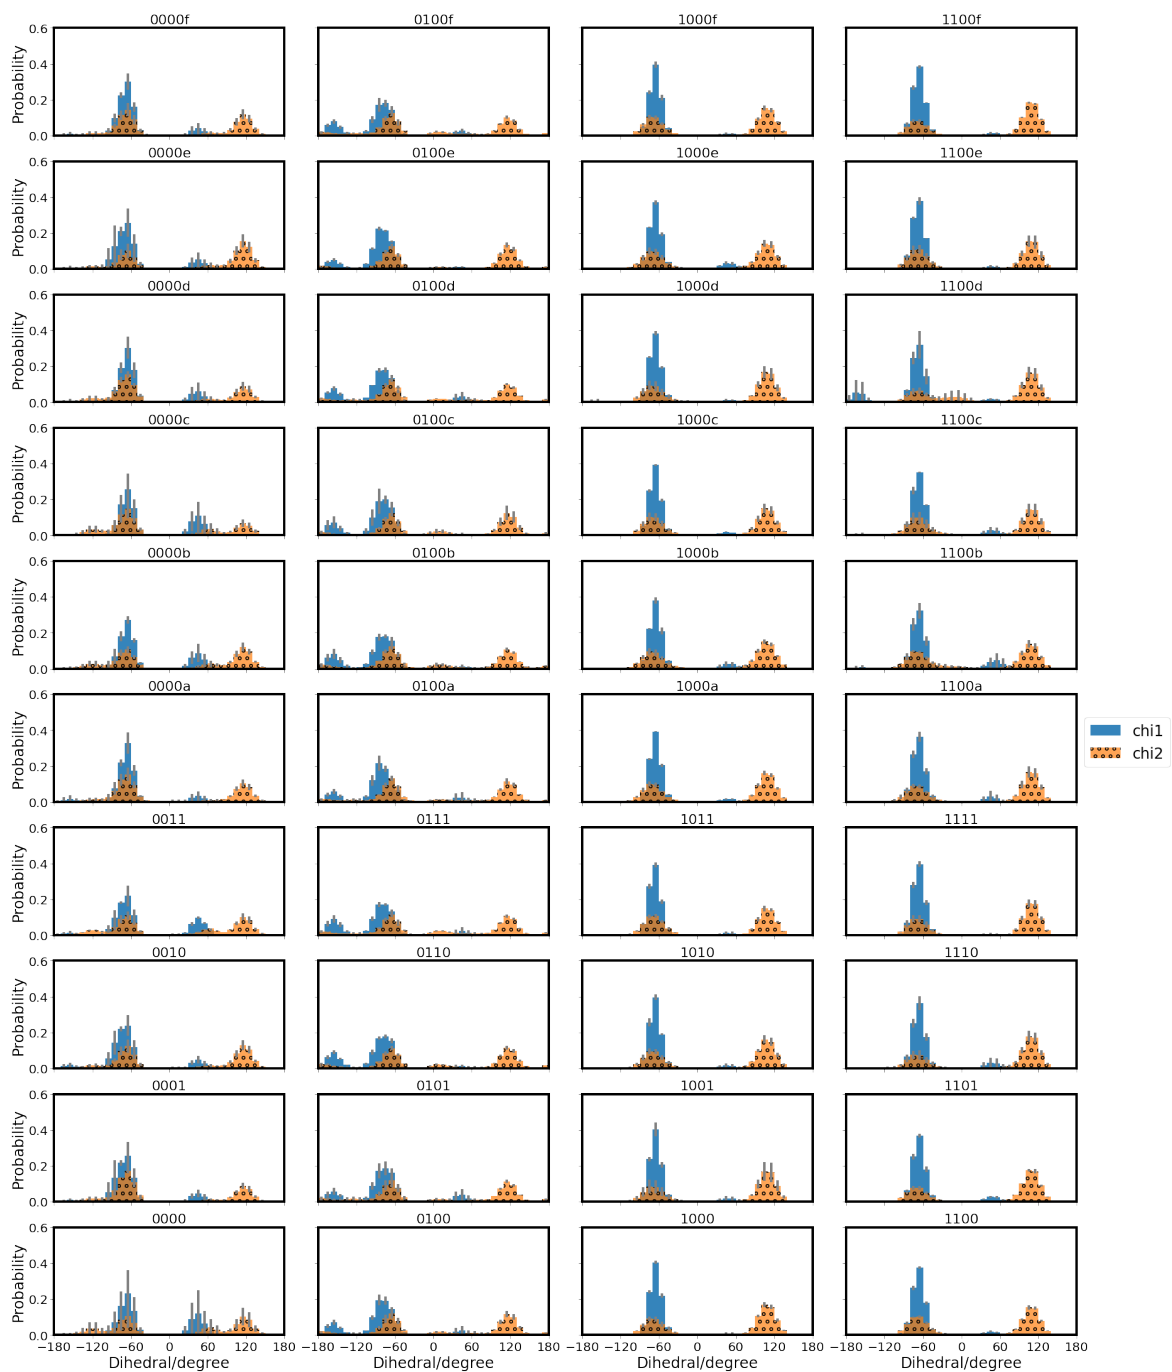

Figure S29: Distribution of side chain dihedral angles of D132 in different protonation models of CcO.

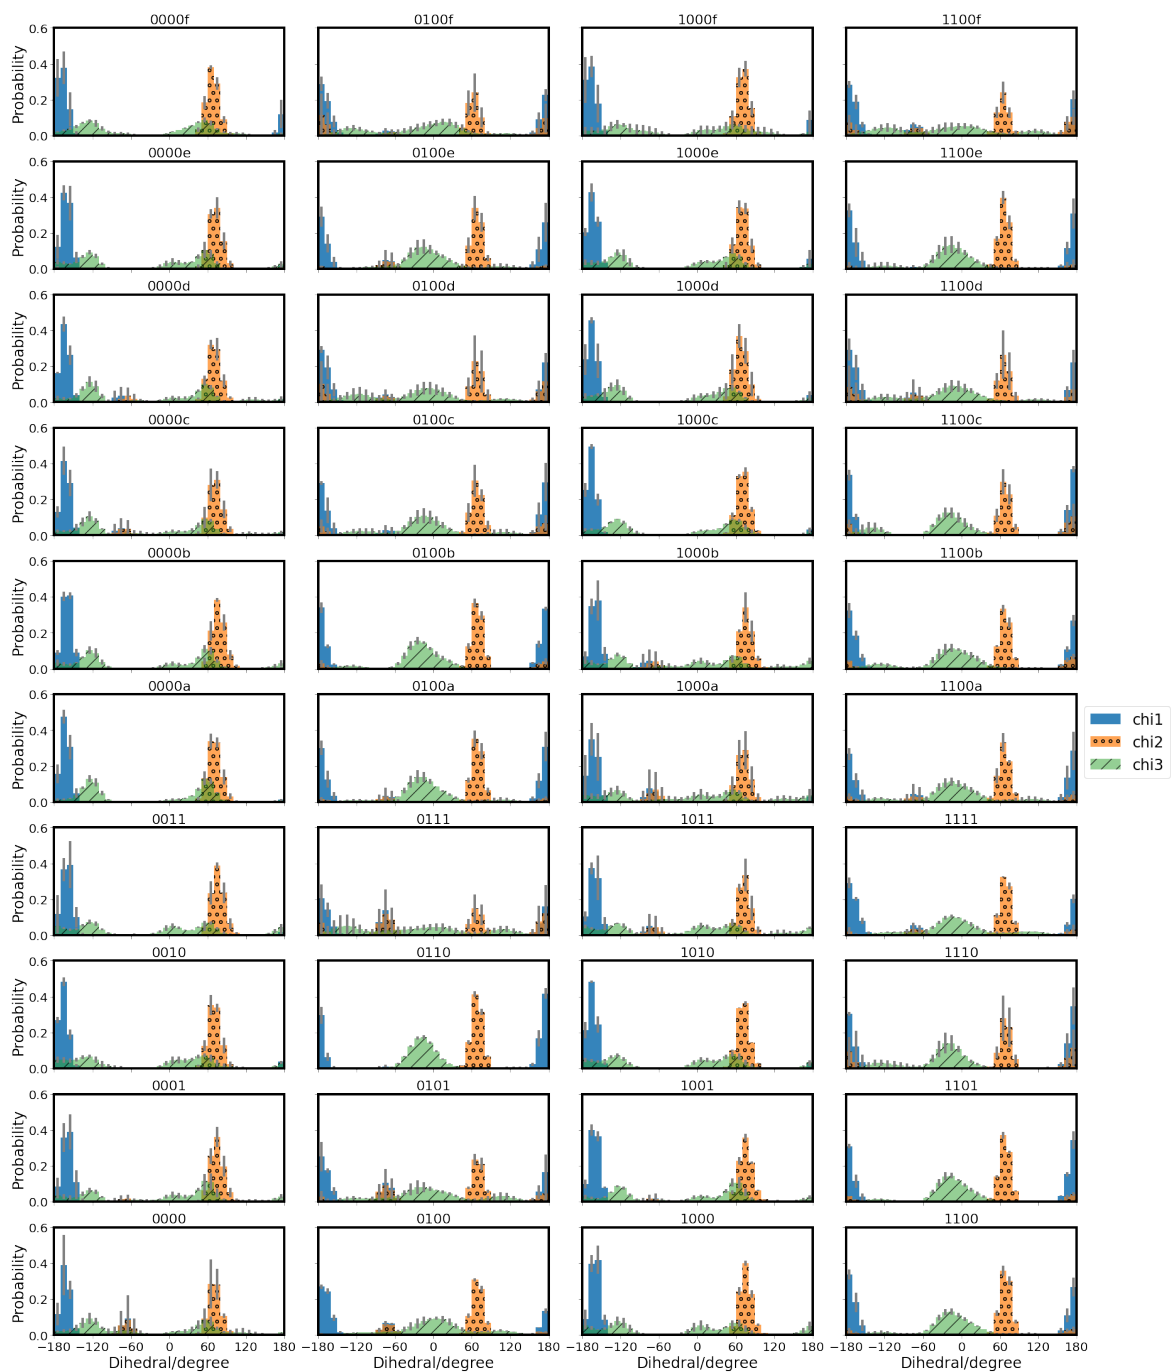

Figure S30: Distribution of side chain dihedral angles of E286 in different protonation models of CcO.

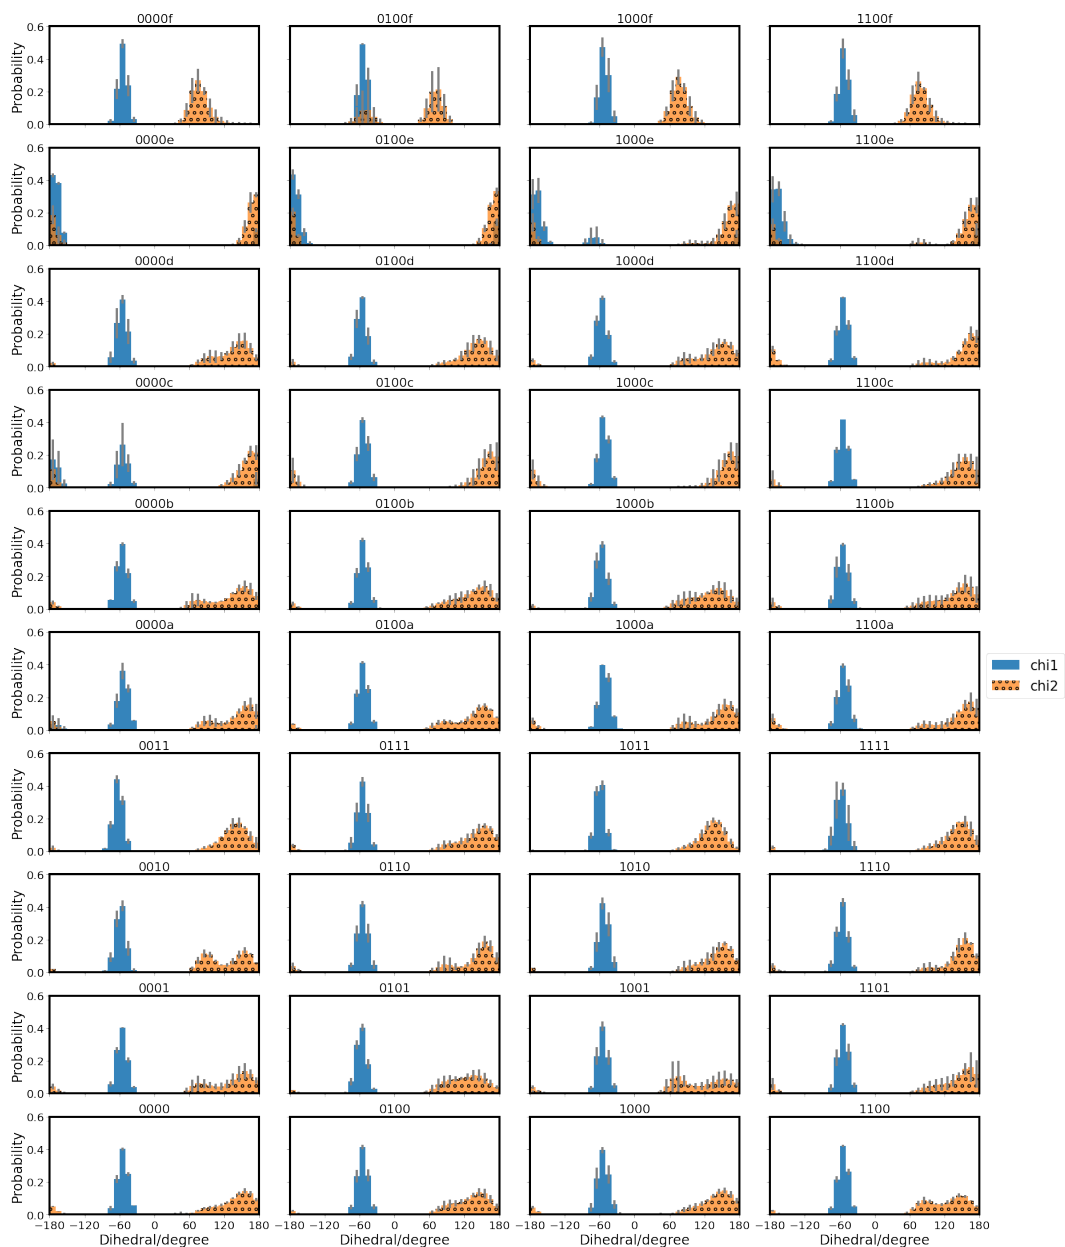

Figure S31: Distribution of side chain dihedral angles of T359 in different protonation models of CcO.

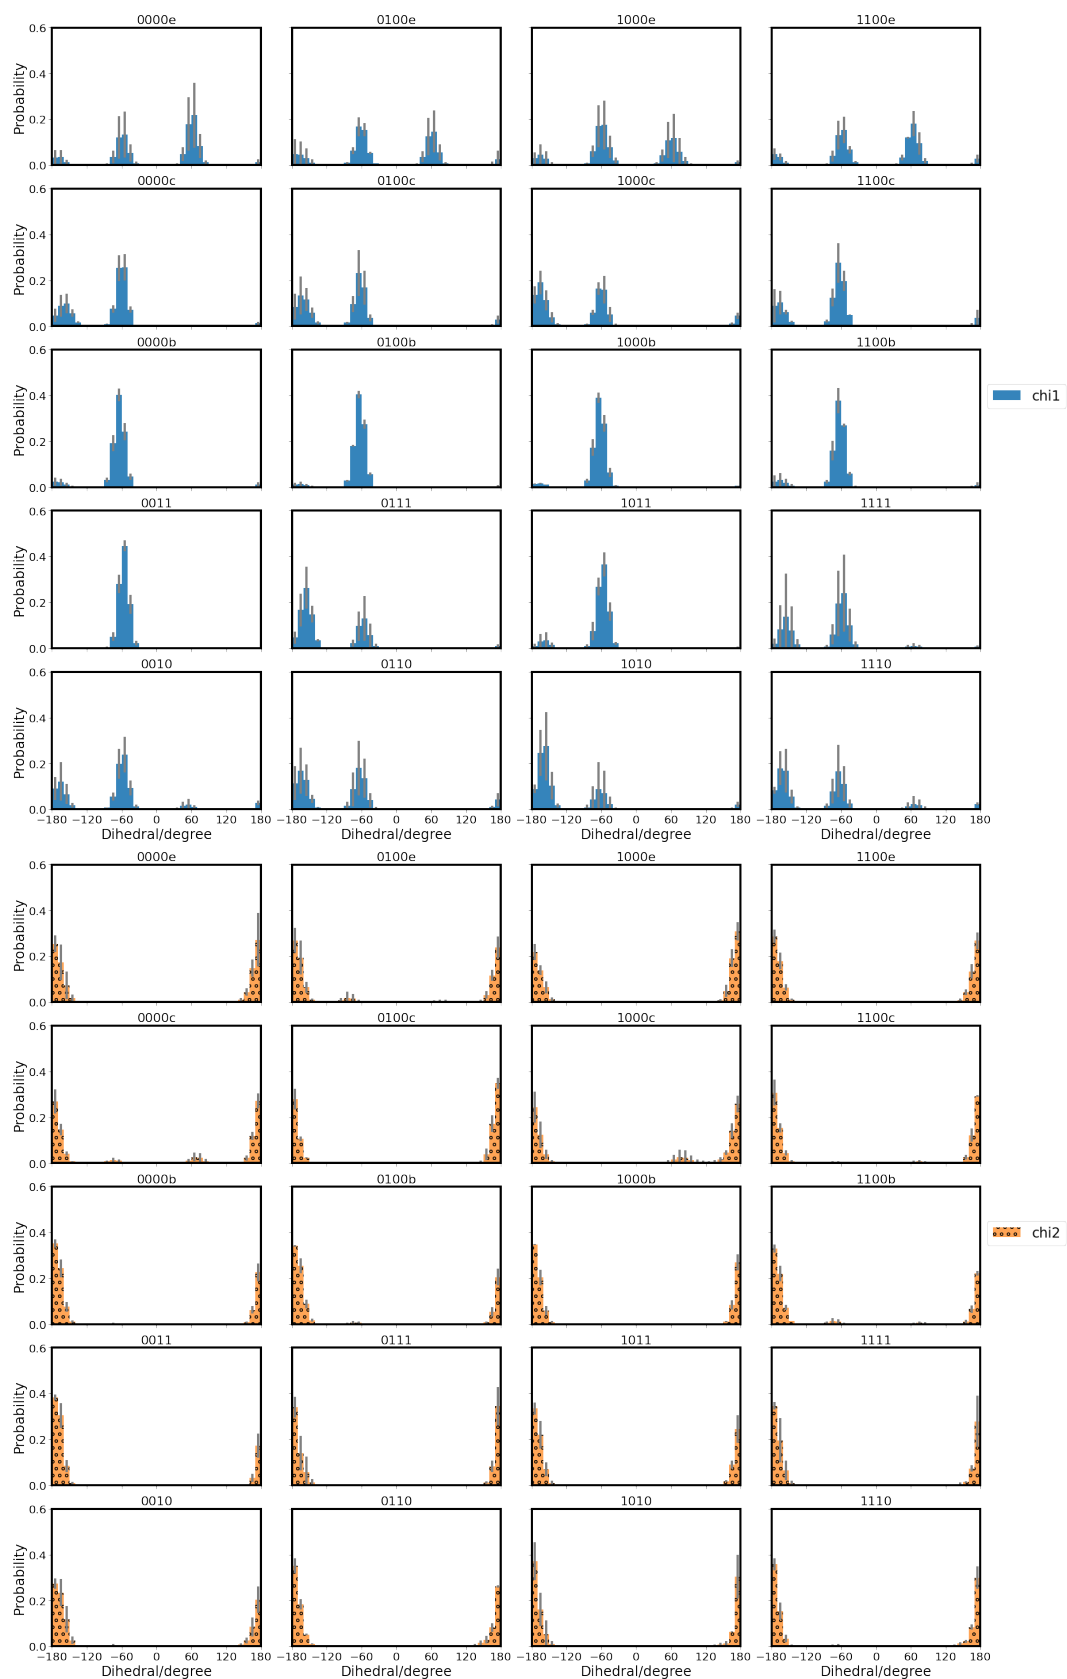

Figure S32: Distribution of side chain dihedral angles  $\chi_1$  (top) and  $\chi_2$  (bottom) of K362 in the most important protonation models of CcO.

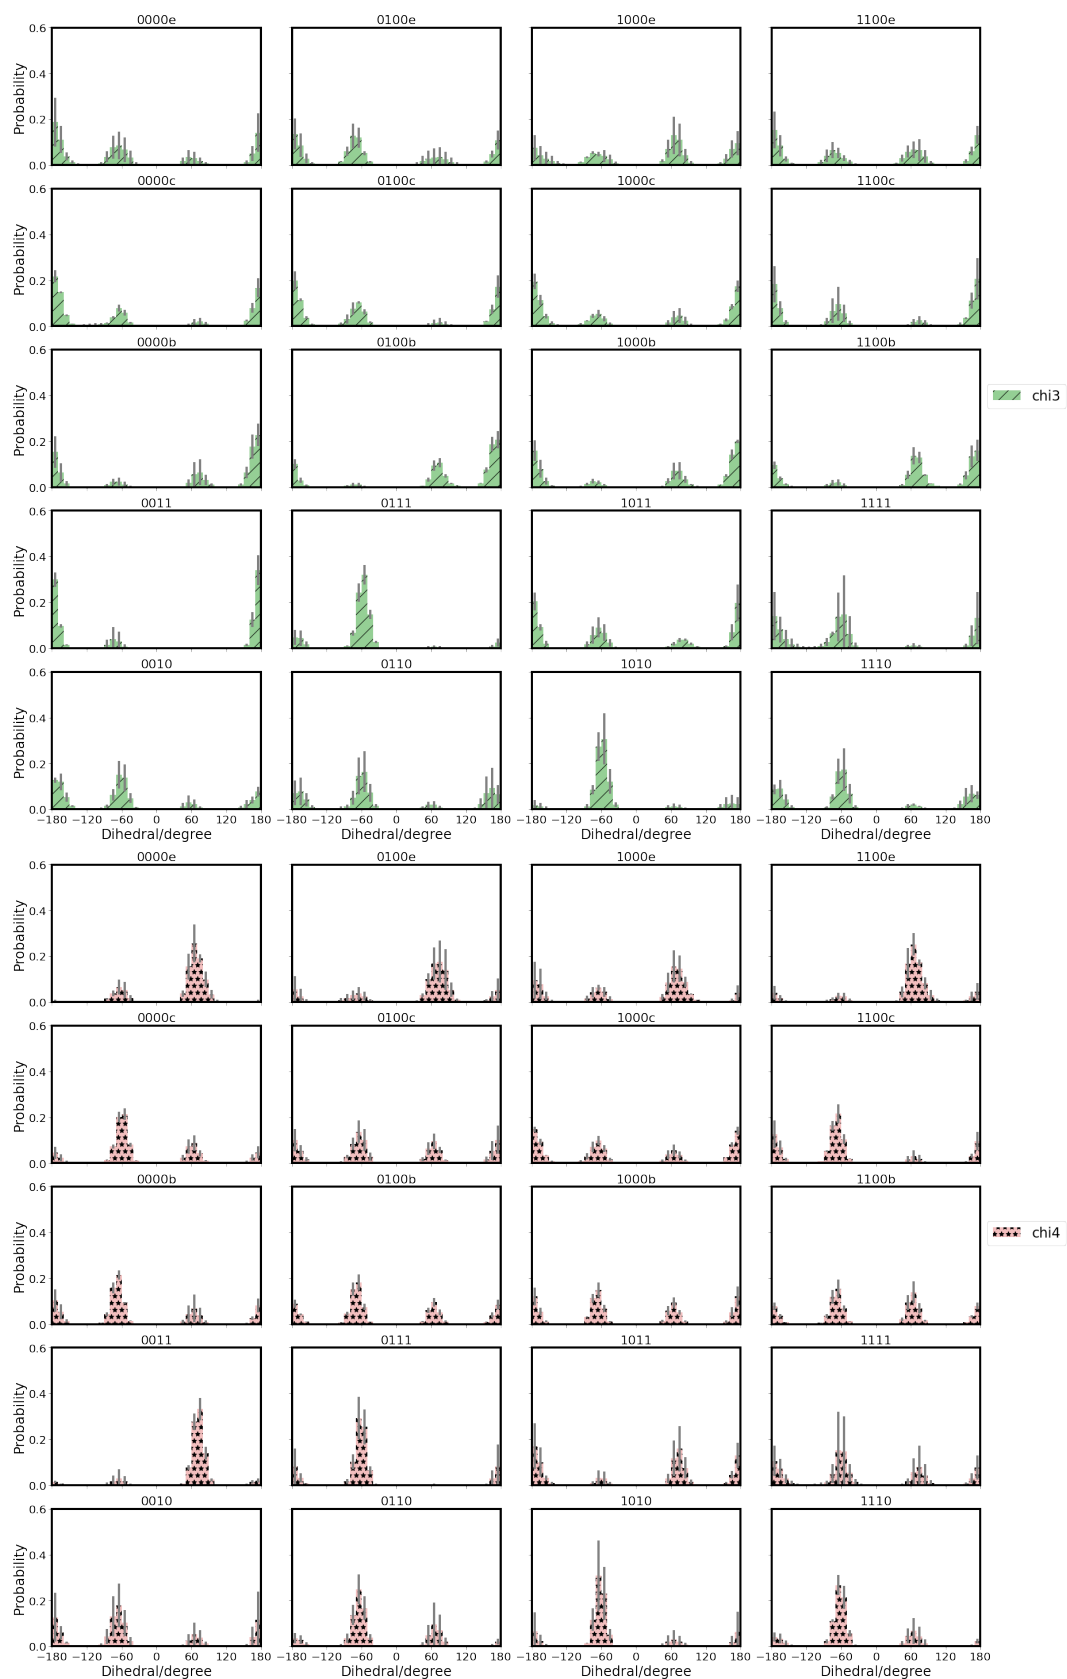

Figure S33: Distribution of side chain dihedral angles  $\chi_3$  (top) and  $\chi_4$  (bottom) of K362 in the most important protonation models of CcO.

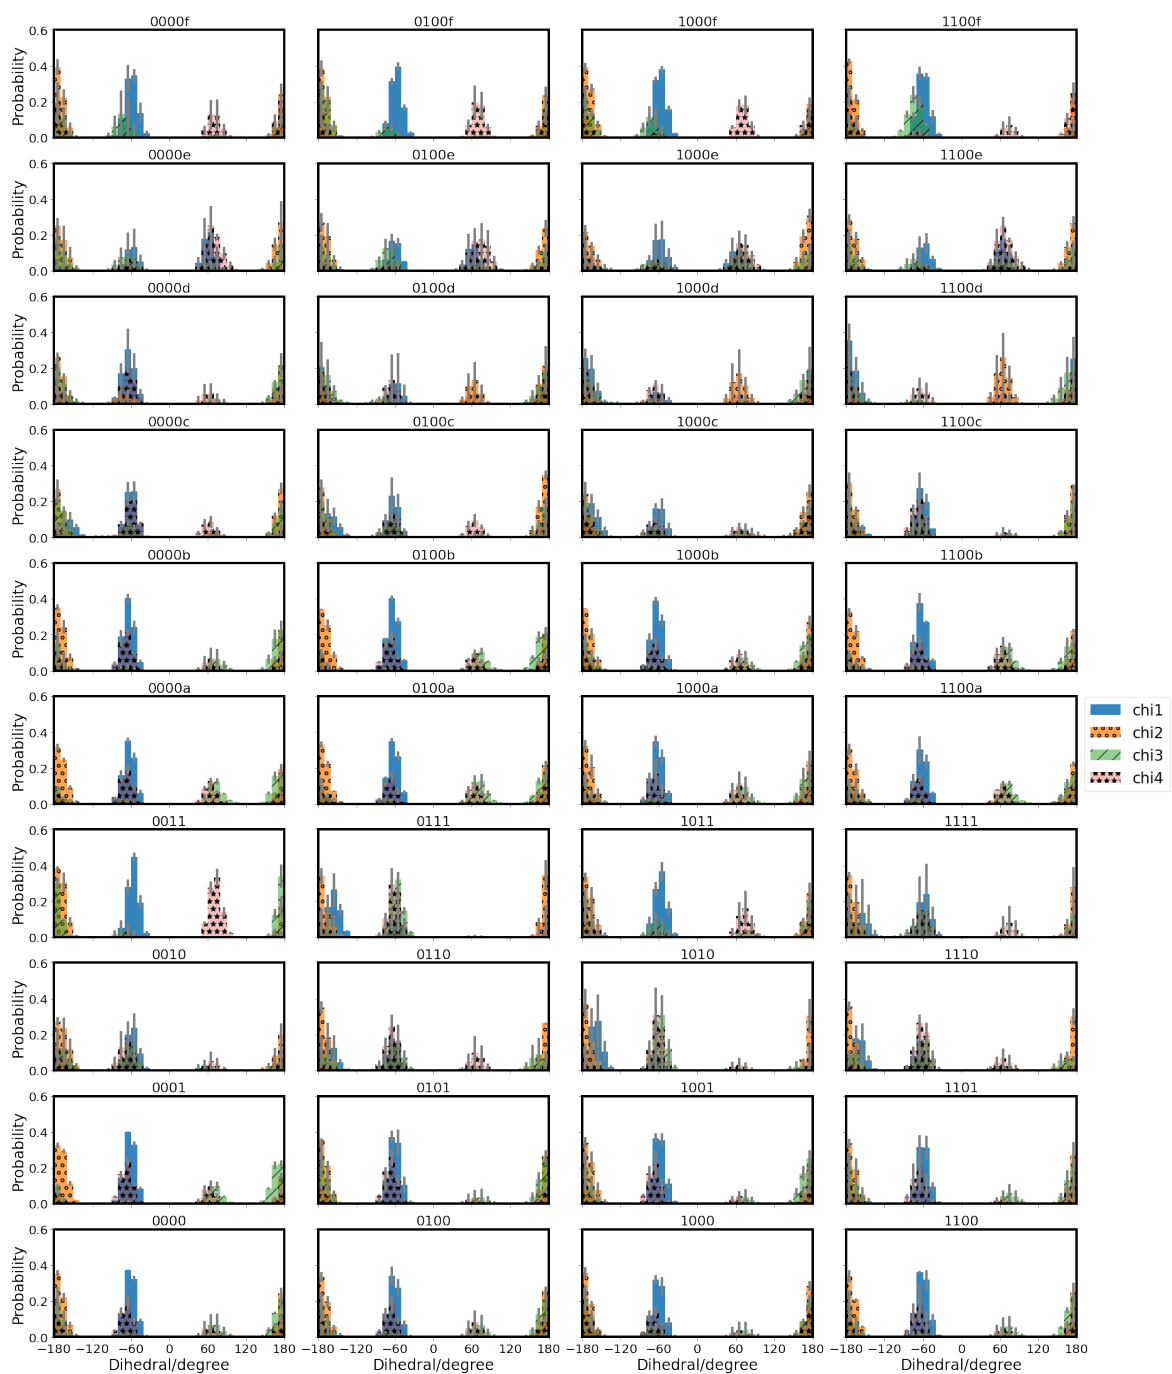

Figure S34: Distribution of side chain dihedral angles of K362 in different protonation models of CcO.

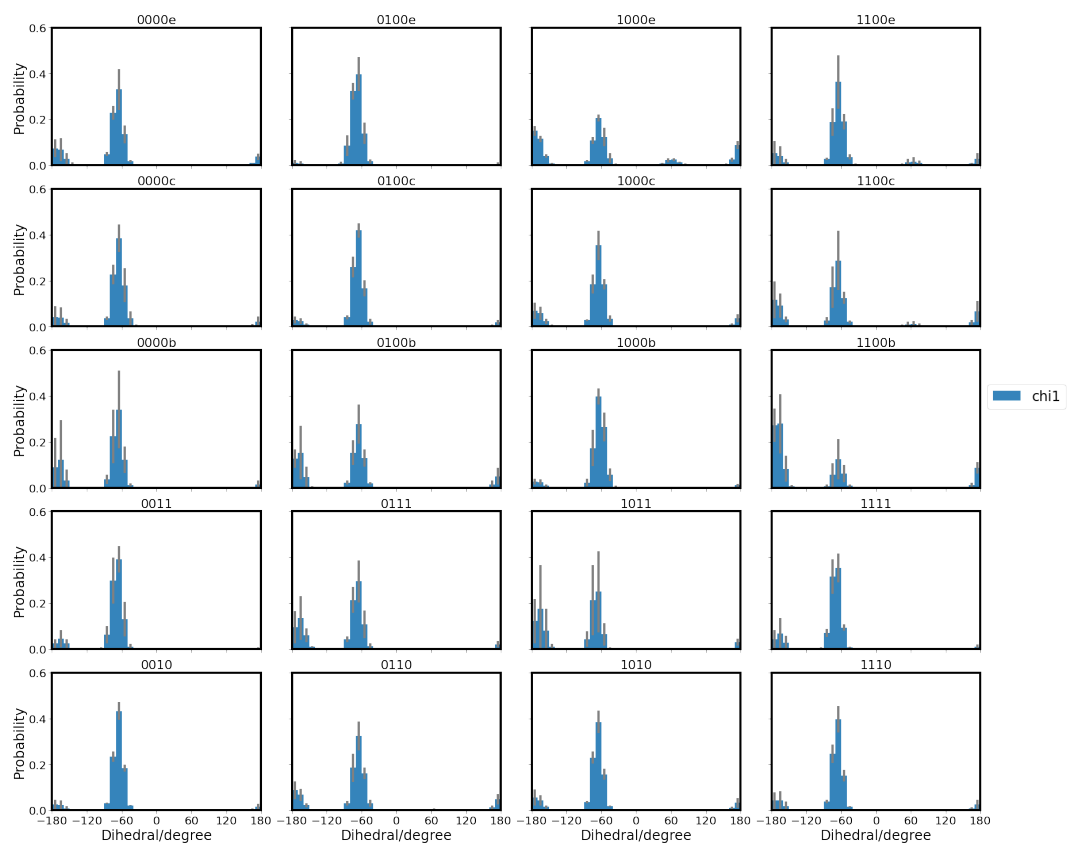

Figure S35: Distribution of side chain dihedral angle  $\chi_1$  of E101 in the most important protonation models of CcO.

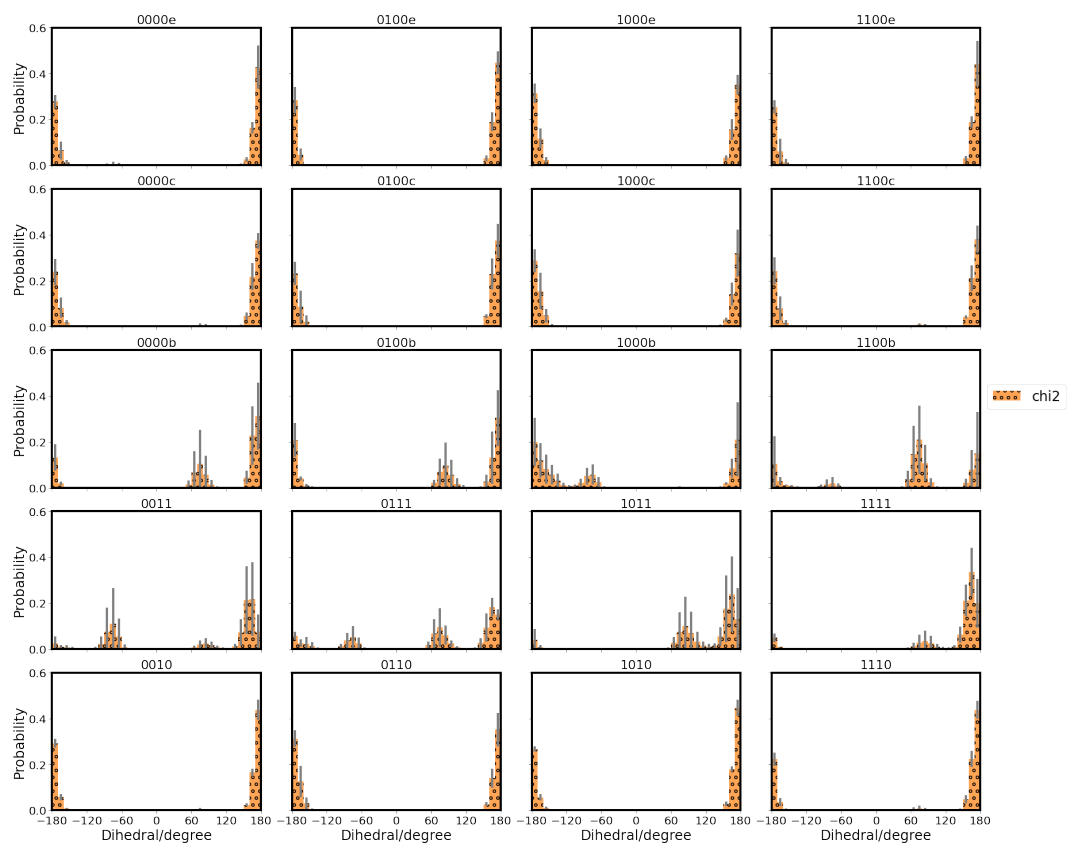

Figure S36: Distribution of side chain dihedral angle  $\chi_2$  of E101 in the most important protonation models of CcO.



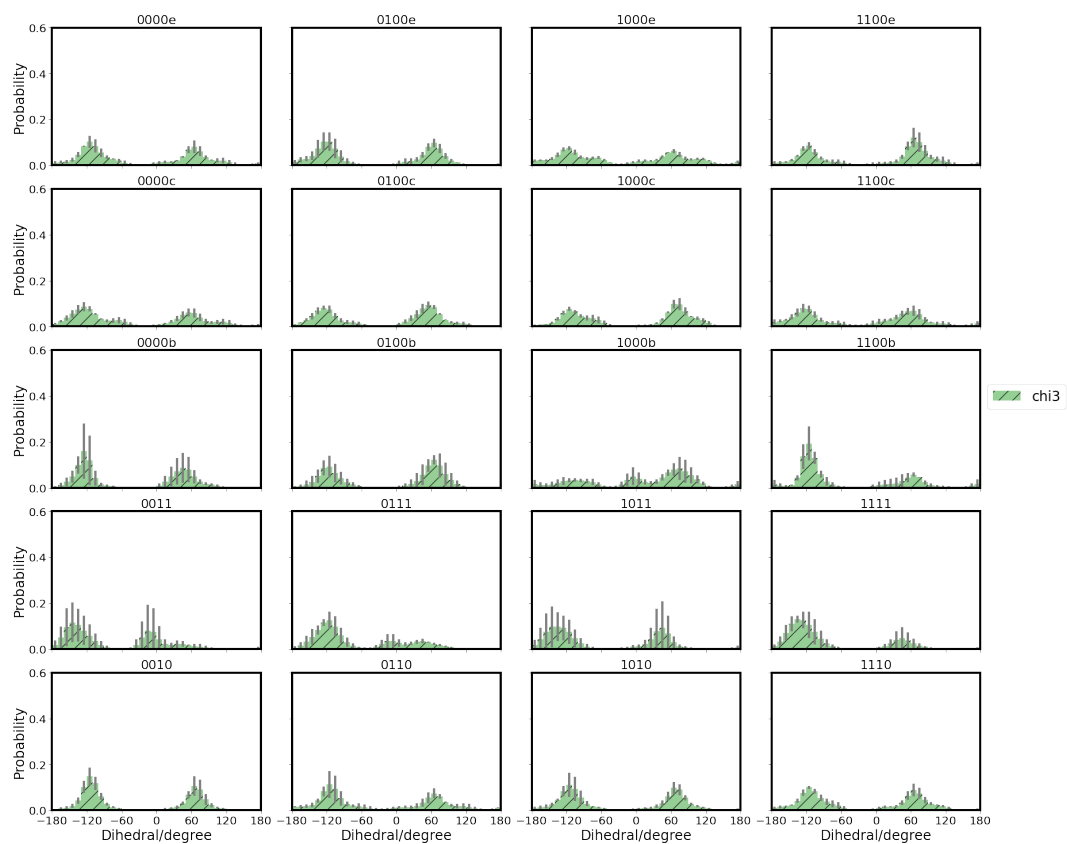

Figure S37: Distribution of side chain dihedral angle  $\chi_3$  of E101 in the most important protonation models of CcO.

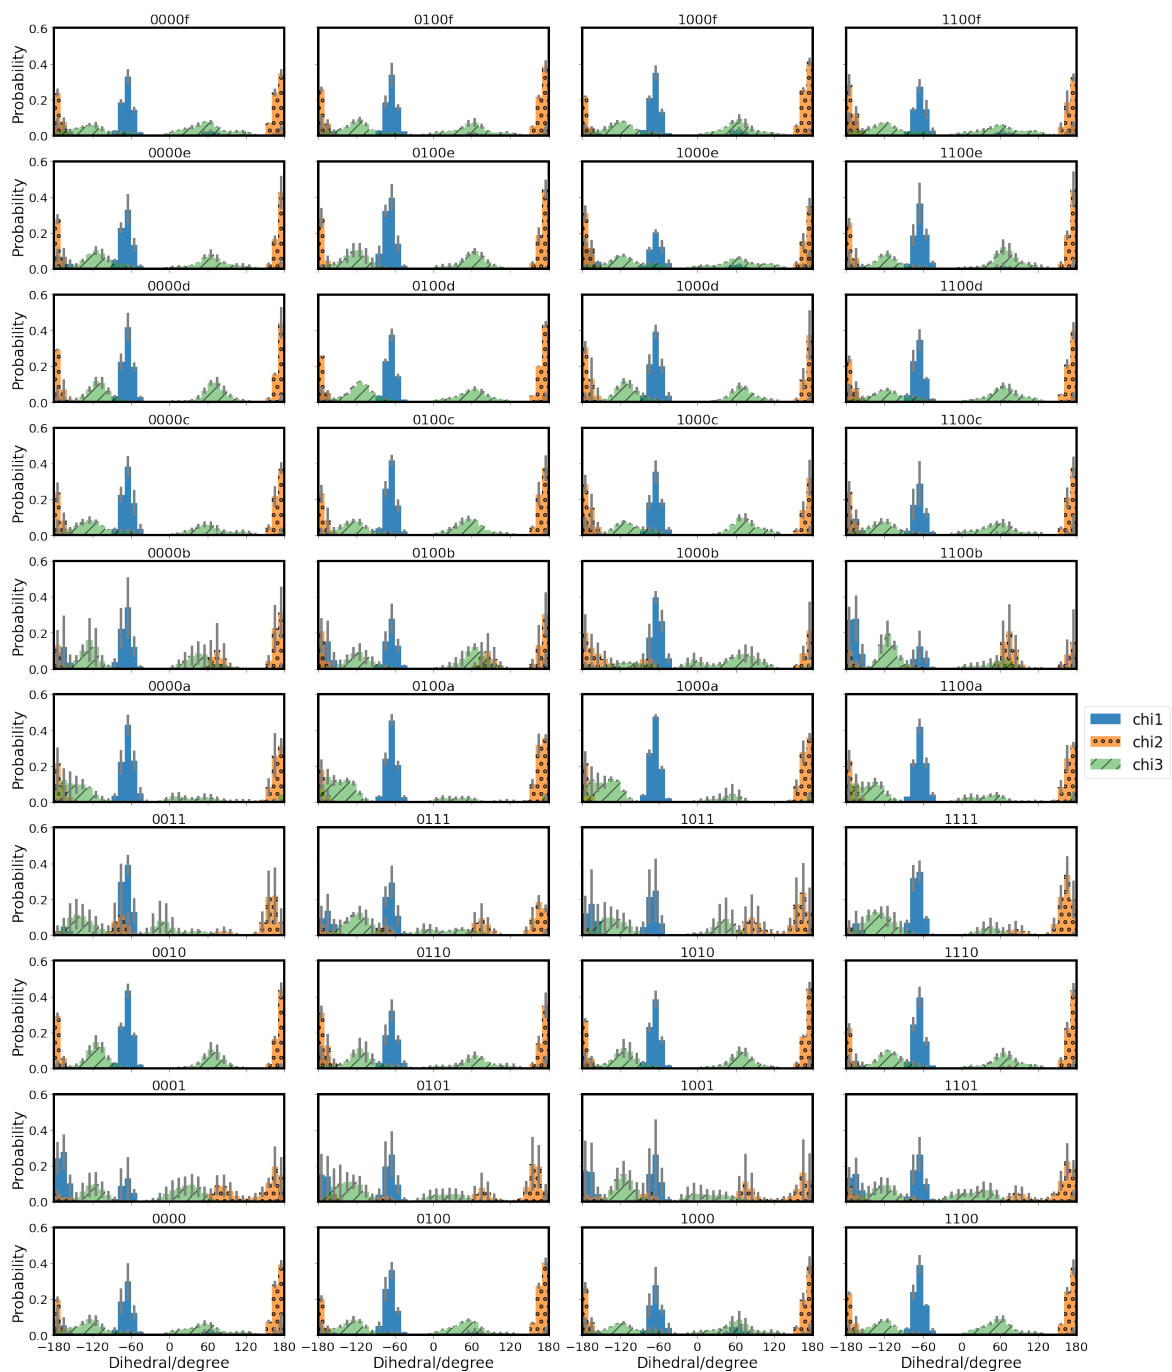

Figure S38: Distribution of side chain dihedral angles of E101 in different protonation models of CcO.

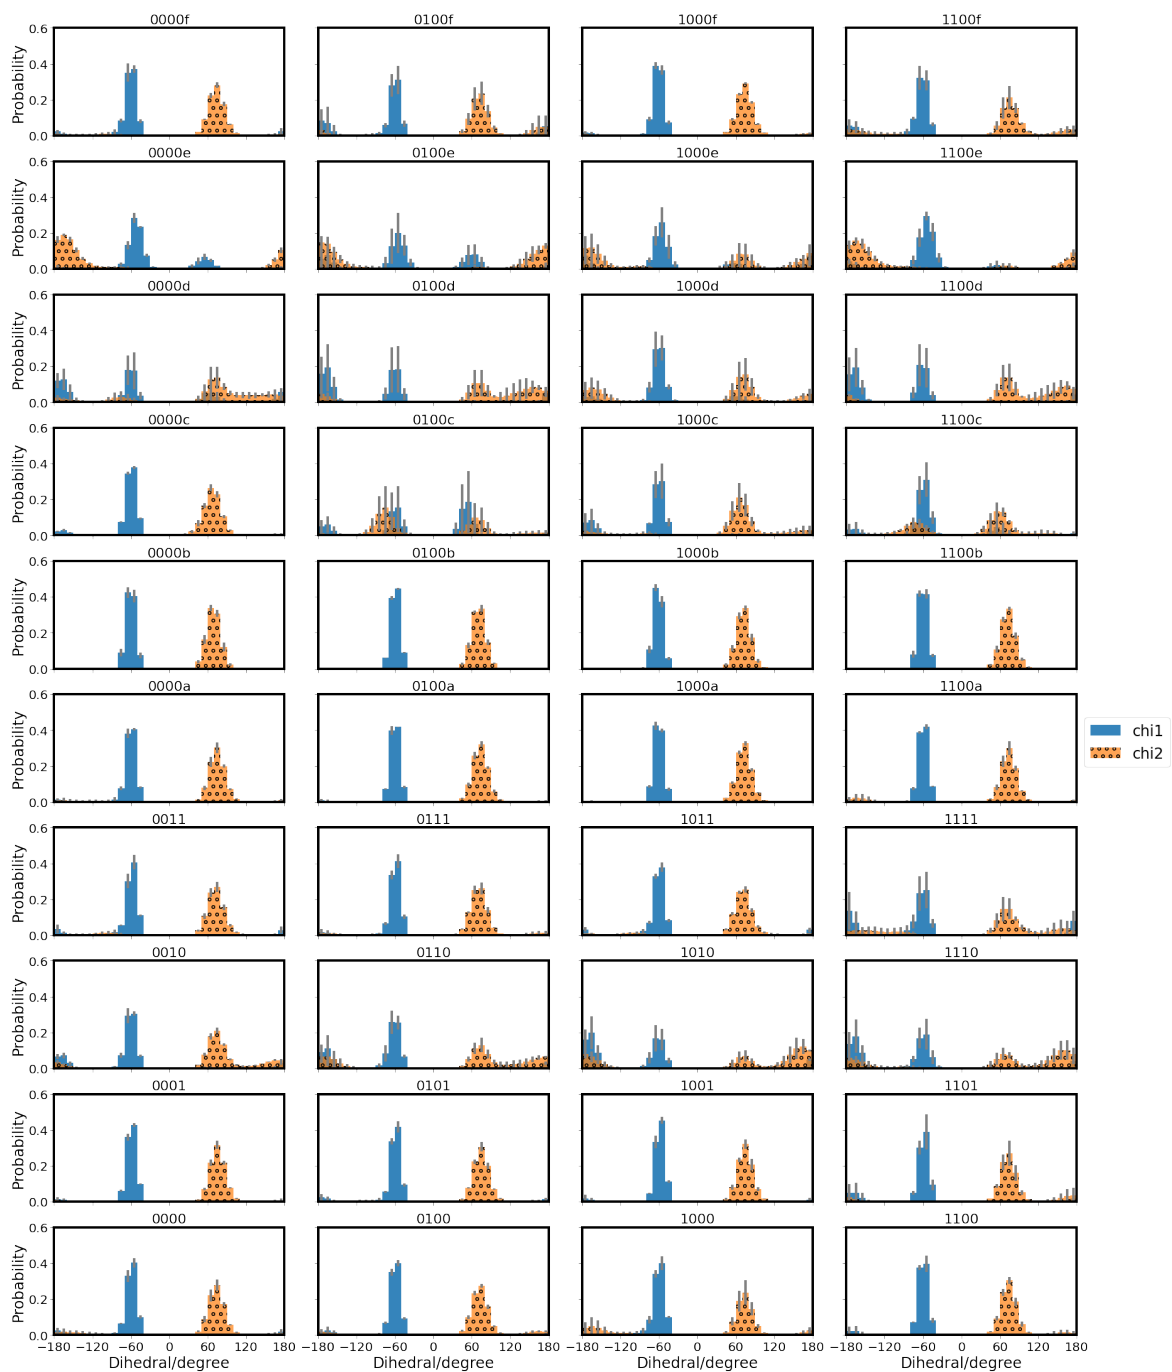

Figure S39: Distribution of side chain dihedral angles of S365 in different protonation models of CcO.

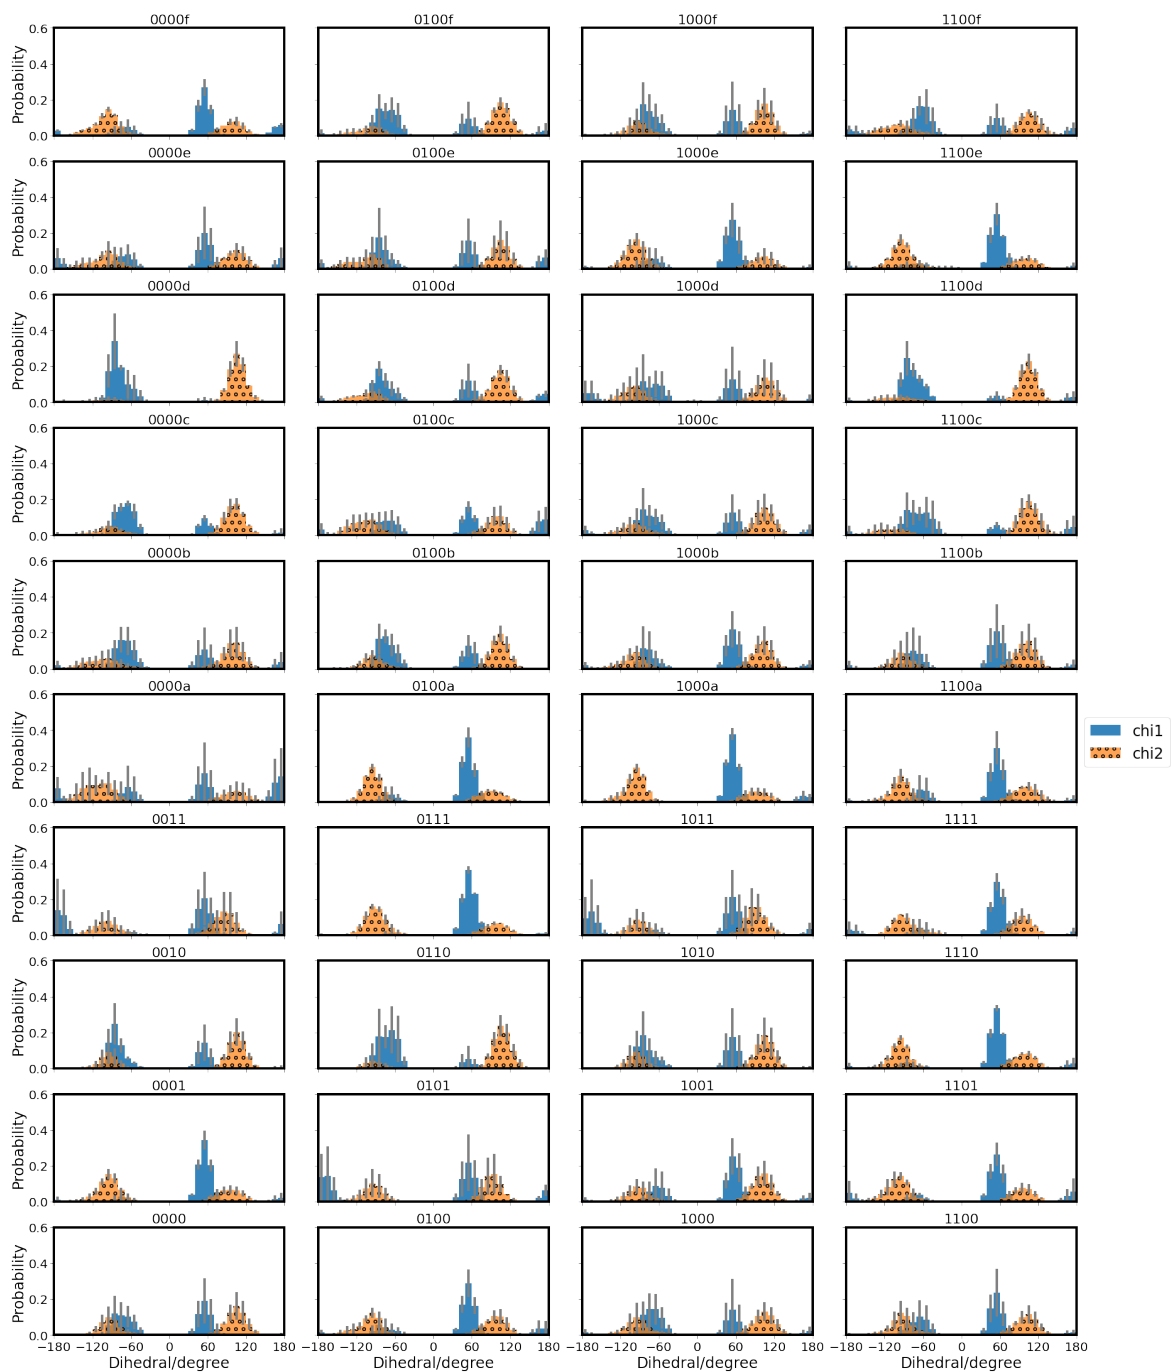

Figure S40: Distribution of side chain dihedral angles of H96 in different protonation models of CcO.

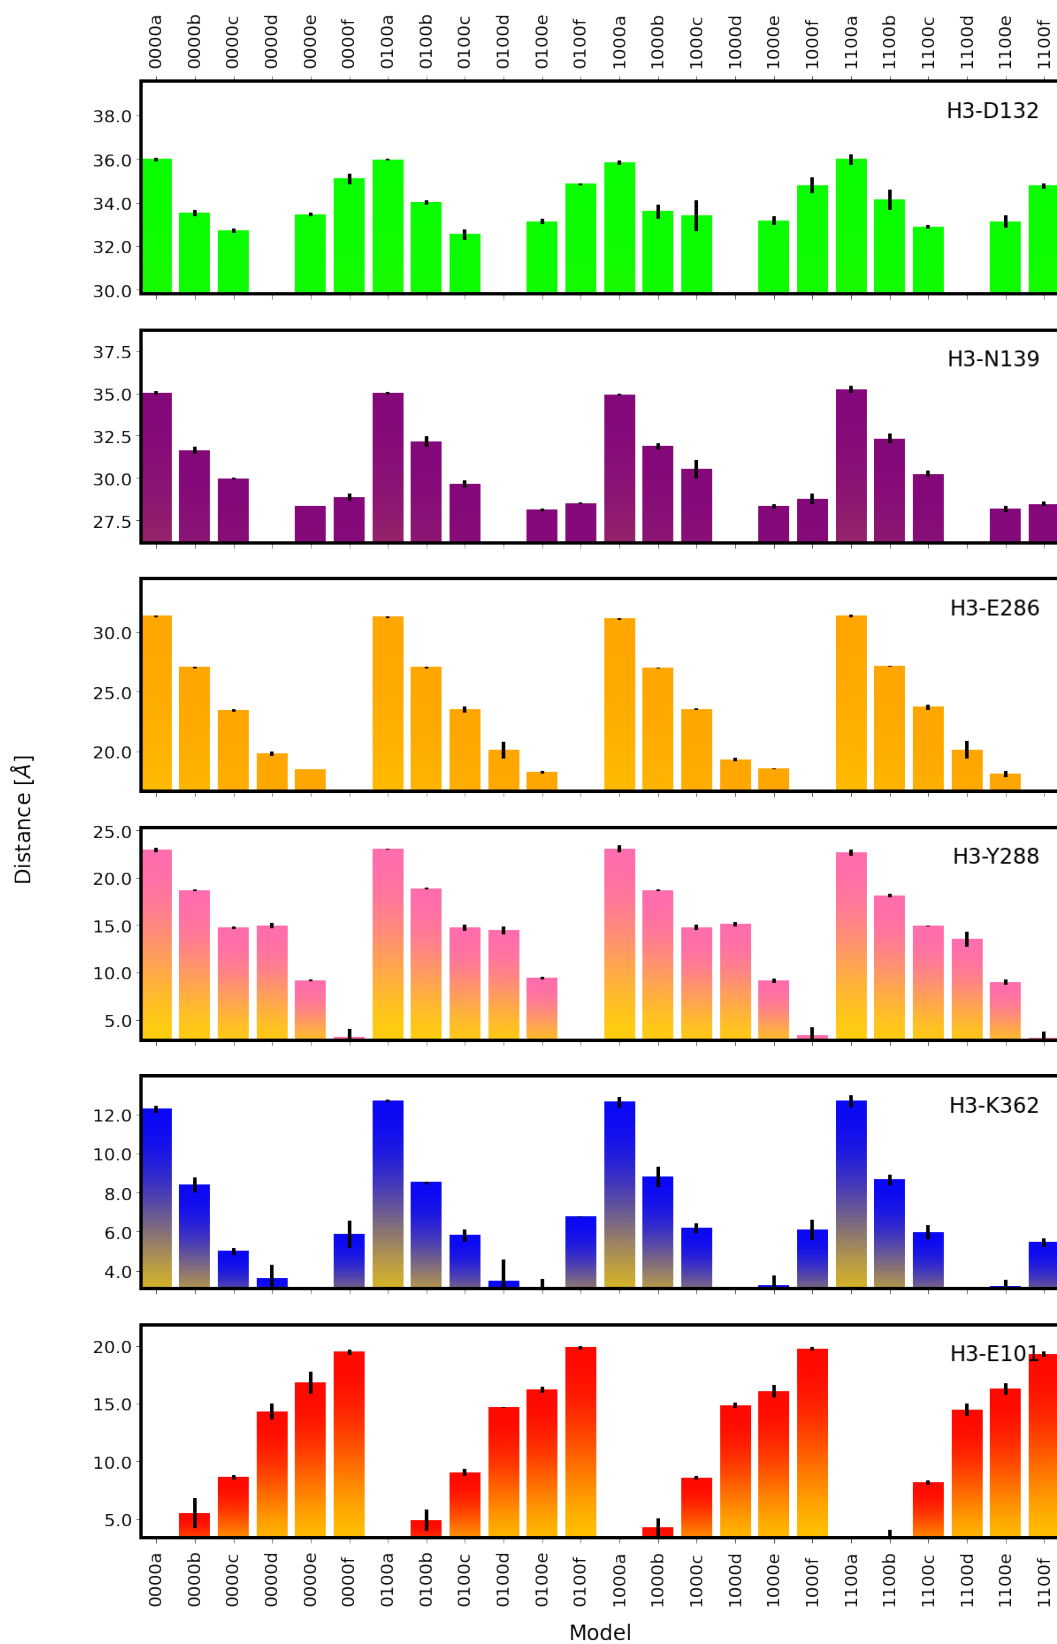

Figure S41: Average distances between the  $H_3O^+$  ion and important residues in different protonation models of CcO.

## 2 Channel hydration

Table S6: Average amount of water molecules in the D-channel cylinder

| 00*   |                | 01*   |                | 10*   |                | 11*   |                |
|-------|----------------|-------|----------------|-------|----------------|-------|----------------|
| 0000f | $20.3 \pm 0.8$ | 0100f | $14.6 \pm 2.1$ | 1000f | $19.0 \pm 1.5$ | 1100f | $15.1 \pm 0.5$ |
| 0000e | $20.3 \pm 0.5$ | 0100e | $14.6 \pm 0.8$ | 1000e | $20.1 \pm 1.8$ | 1100e | $15.2 \pm 0.8$ |
| 0000d | $21.3 \pm 0.8$ | 0100d | $15.0 \pm 1.6$ | 1000d | $19.5 \pm 0.4$ | 1100d | $16.3 \pm 0.9$ |
| 0000c | $21.4 \pm 0.9$ | 0100c | $15.6 \pm 1.1$ | 1000c | $22.0 \pm 0.6$ | 1100c | $21.3 \pm 0.8$ |
| 0000b | $19.7 \pm 1.6$ | 0100b | $14.3 \pm 0.4$ | 1000b | $20.8 \pm 1.4$ | 1100b | $21.4 \pm 0.9$ |
| 0000a | $20.4 \pm 0.7$ | 0100a | $15.8 \pm 0.4$ | 1000a | $20.0 \pm 1.1$ | 1100a | $19.7 \pm 1.6$ |
| 0011  | $19.0 \pm 0.2$ | 0111  | $14.9 \pm 1.0$ | 1011  | $19.4 \pm 0.6$ | 1111  | $15.9 \pm 0.6$ |
| 0010  | $20.0 \pm 0.4$ | 0110  | $15.7 \pm 0.3$ | 1010  | $20.5 \pm 2.2$ | 1110  | $15.1 \pm 0.3$ |
| 0001  | $18.8 \pm 0.5$ | 0101  | $14.8 \pm 0.7$ | 1001  | $20.5 \pm 0.7$ | 1101  | $16.1 \pm 0.3$ |
| 0000  | $21.5 \pm 1.0$ | 0100  | $16.8 \pm 0.6$ | 1000  | $20.5 \pm 2.2$ | 1100  | $16.2 \pm 0.4$ |

Table S7: Average amount of water molecules in the K-channel cylinder

| 00*   |                | 01*   |                | 10*   |                | 11*   |                |
|-------|----------------|-------|----------------|-------|----------------|-------|----------------|
| 0000f | $15.0 \pm 0.5$ | 0100f | $14.1 \pm 3.8$ | 1000f | $13.9 \pm 0.8$ | 1100f | $20.2 \pm 6.4$ |
| 0000e | $20.4 \pm 3.2$ | 0100e | $16.8 \pm 3.5$ | 1000e | $19.8 \pm 5.4$ | 1100e | $19.8 \pm 4.2$ |
| 0000d | $20.5 \pm 5.9$ | 0100d | $23.9 \pm 2.4$ | 1000d | $29.0 \pm 9.8$ | 1100d | $26.2 \pm 2.6$ |
| 0000c | $21.2 \pm 2.2$ | 0100c | $20.0 \pm 2.3$ | 1000c | $26.0 \pm 3.9$ | 1100c | $18.1 \pm 2.4$ |
| 0000b | $13.4 \pm 1.1$ | 0100b | $9.5 \pm 2.4$  | 1000b | $10.3 \pm 0.3$ | 1100b | $10.8 \pm 1.1$ |
| 0000a | $14.8 \pm 3.9$ | 0100a | $9.9 \pm 4.2$  | 1000a | $10.2 \pm 1.6$ | 1100a | $13.5 \pm 3.0$ |
| 0011  | $6.6 \pm 0.7$  | 0111  | $15.5 \pm 0.7$ | 1011  | $9.7 \pm 1.6$  | 1111  | $10.1 \pm 1.0$ |
| 0010  | $25.8 \pm 0.8$ | 0110  | $29.7 \pm 3.5$ | 1010  | $22.3 \pm 4.3$ | 1110  | $23.6 \pm 6.0$ |
| 0001  | $8.1 \pm 0.7$  | 0101  | $6.7 \pm 2.0$  | 1001  | $7.1 \pm 1.2$  | 1101  | $11.2 \pm 2.7$ |
| 0000  | $14.0 \pm 2.2$ | 0100  | $7.5 \pm 4.3$  | 1000  | $18.3 \pm 6.2$ | 1100  | $14.4 \pm 2.3$ |

Table S8: Average volume (in nm<sup>3</sup>) of polyhedron in D-Channel

| 00*   |                   | 01*   |                   | 10*   |                   | 11*   |                   |
|-------|-------------------|-------|-------------------|-------|-------------------|-------|-------------------|
| 0000f | $2.401 \pm 0.047$ | 0100f | $2.376 \pm 0.024$ | 1000f | $2.350 \pm 0.012$ | 1100f | $2.351 \pm 0.024$ |
| 0000e | $2.322 \pm 0.027$ | 0100e | $2.339 \pm 0.020$ | 1000e | $2.343 \pm 0.013$ | 1100e | $2.333 \pm 0.007$ |
| 0000d | $2.384 \pm 0.042$ | 0100d | $2.398 \pm 0.025$ | 1000d | $2.407 \pm 0.031$ | 1100d | $2.378 \pm 0.013$ |
| 0000c | $2.359 \pm 0.021$ | 0100c | $2.385 \pm 0.049$ | 1000c | $2.383 \pm 0.019$ | 1100c | $2.361 \pm 0.010$ |
| 0000b | $2.326 \pm 0.020$ | 0100b | $2.336 \pm 0.036$ | 1000b | $2.347 \pm 0.032$ | 1100b | $2.325 \pm 0.024$ |
| 0000a | $2.335 \pm 0.022$ | 0100a | $2.347 \pm 0.003$ | 1000a | $2.370 \pm 0.026$ | 1100a | $2.339 \pm 0.010$ |
| 0011  | $2.338 \pm 0.021$ | 0111  | $2.388 \pm 0.027$ | 1011  | $2.365 \pm 0.005$ | 1111  | $2.353 \pm 0.018$ |
| 0010  | $2.392 \pm 0.008$ | 0110  | $2.387 \pm 0.005$ | 1010  | $2.402 \pm 0.047$ | 1110  | $2.408 \pm 0.042$ |
| 0001  | $2.341 \pm 0.007$ | 0101  | $2.368 \pm 0.009$ | 1001  | $2.342 \pm 0.018$ | 1101  | $2.348 \pm 0.009$ |
| 0000  | $2.365 \pm 0.010$ | 0100  | $2.360 \pm 0.008$ | 1000  | $2.358 \pm 0.031$ | 1100  | $2.339 \pm 0.014$ |

Table S9: Average volume (in nm<sup>3</sup>) of polyhedron in K-Channel

| 00*   |               | 01*   |               | 10*   |               | 11*   |               |
|-------|---------------|-------|---------------|-------|---------------|-------|---------------|
| 0000f | 3.326 ± 0.022 | 0100f | 3.270 ± 0.035 | 1000f | 3.285 ± 0.020 | 1100f | 3.376 ± 0.108 |
| 0000e | 3.353 ± 0.095 | 0100e | 3.259 ± 0.043 | 1000e | 3.354 ± 0.086 | 1100e | 3.293 ± 0.079 |
| 0000d | 3.398 ± 0.086 | 0100d | 3.336 ± 0.016 | 1000d | 3.428 ± 0.128 | 1100d | 3.492 ± 0.099 |
| 0000c | 3.346 ± 0.022 | 0100c | 3.278 ± 0.020 | 1000c | 3.345 ± 0.058 | 1100c | 3.288 ± 0.046 |
| 0000b | 3.220 ± 0.030 | 0100b | 3.149 ± 0.046 | 1000b | 3.166 ± 0.039 | 1100b | 3.196 ± 0.042 |
| 0000a | 3.267 ± 0.095 | 0100a | 3.198 ± 0.019 | 1000a | 3.219 ± 0.046 | 1100a | 3.254 ± 0.065 |
| 0011  | 3.183 ± 0.038 | 0111  | 3.266 ± 0.057 | 1011  | 3.185 ± 0.037 | 1111  | 3.214 ± 0.036 |
| 0010  | 3.395 ± 0.025 | 0110  | 3.422 ± 0.050 | 1010  | 3.327 ± 0.071 | 1110  | 3.365 ± 0.071 |
| 0001  | 3.144 ± 0.030 | 0101  | 3.122 ± 0.008 | 1001  | 3.133 ± 0.039 | 1101  | 3.172 ± 0.037 |
| 0000  | 3.175 ± 0.019 | 0100  | 3.182 ± 0.018 | 1000  | 3.262 ± 0.103 | 1100  | 3.168 ± 0.036 |

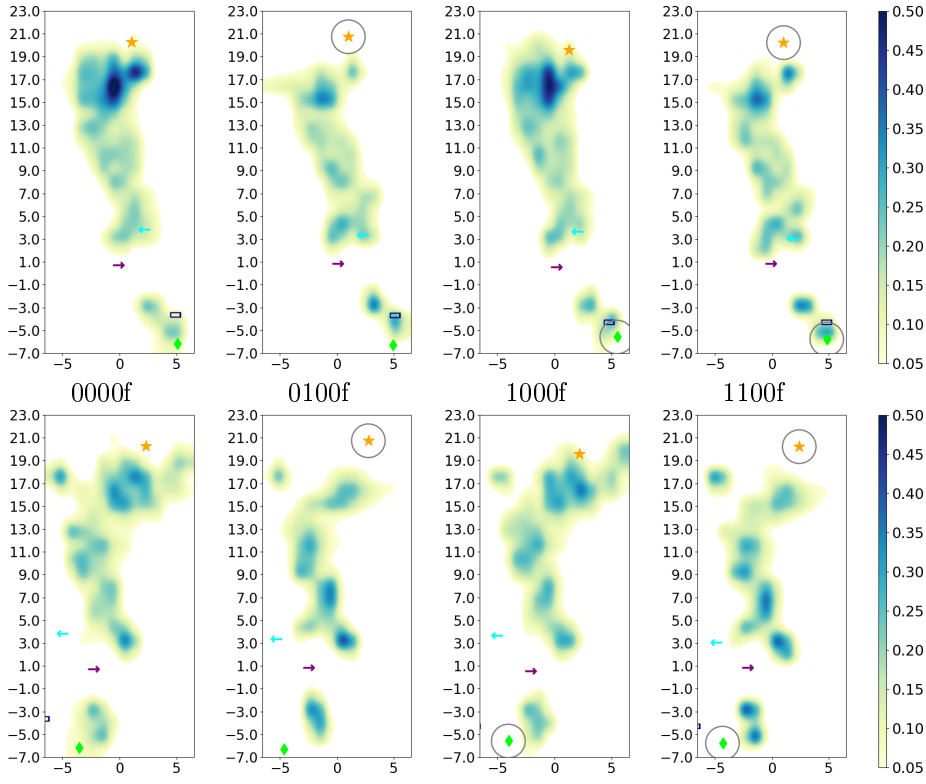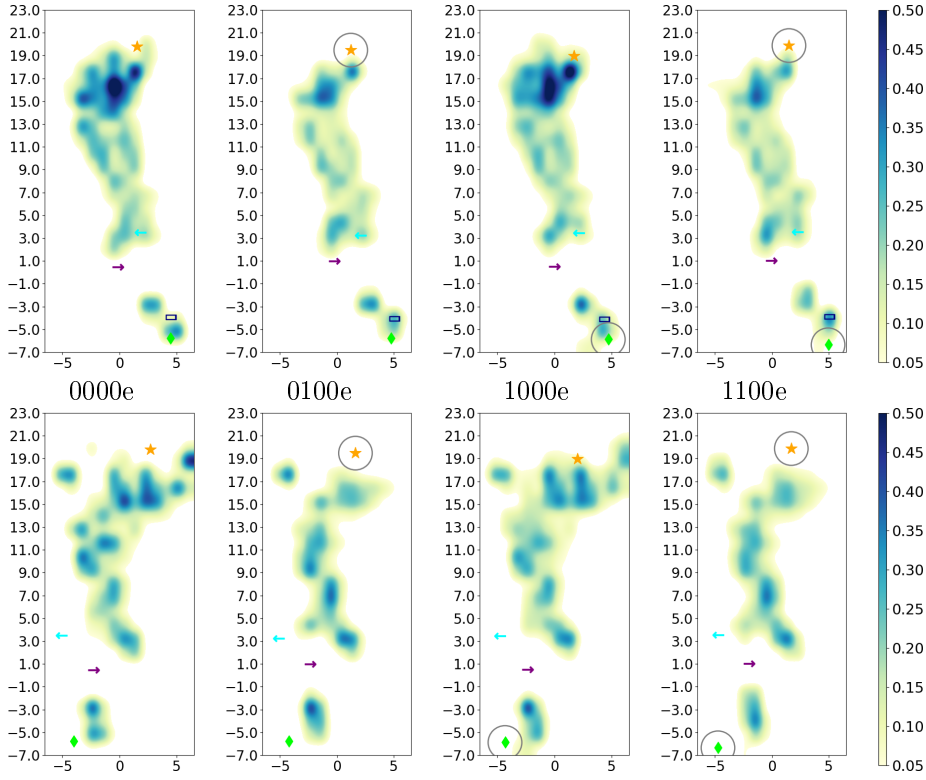



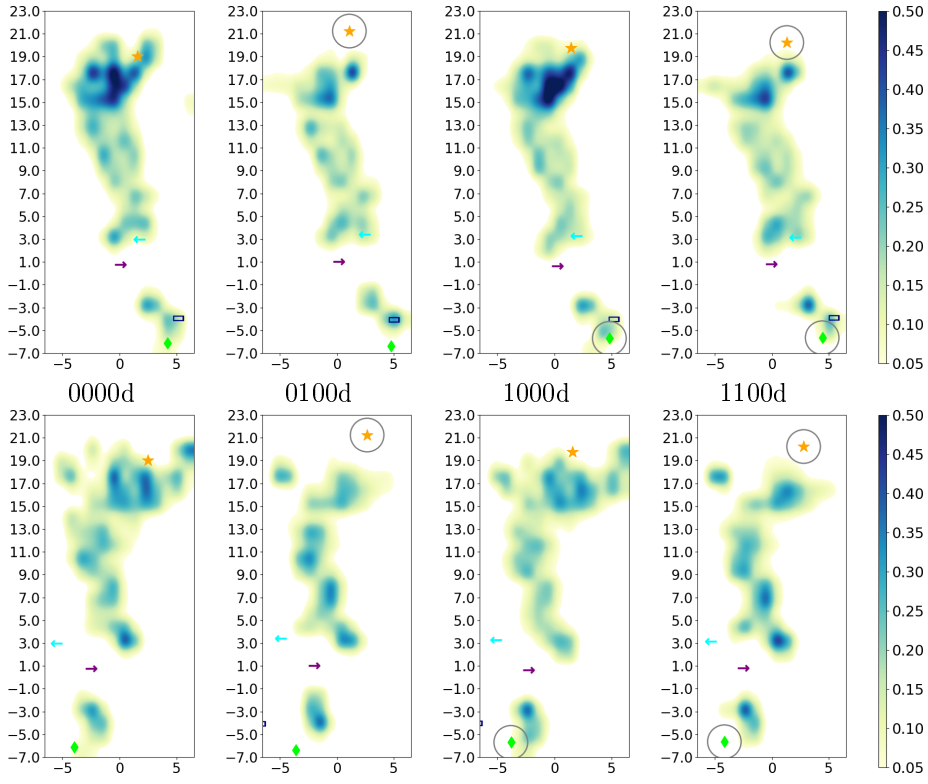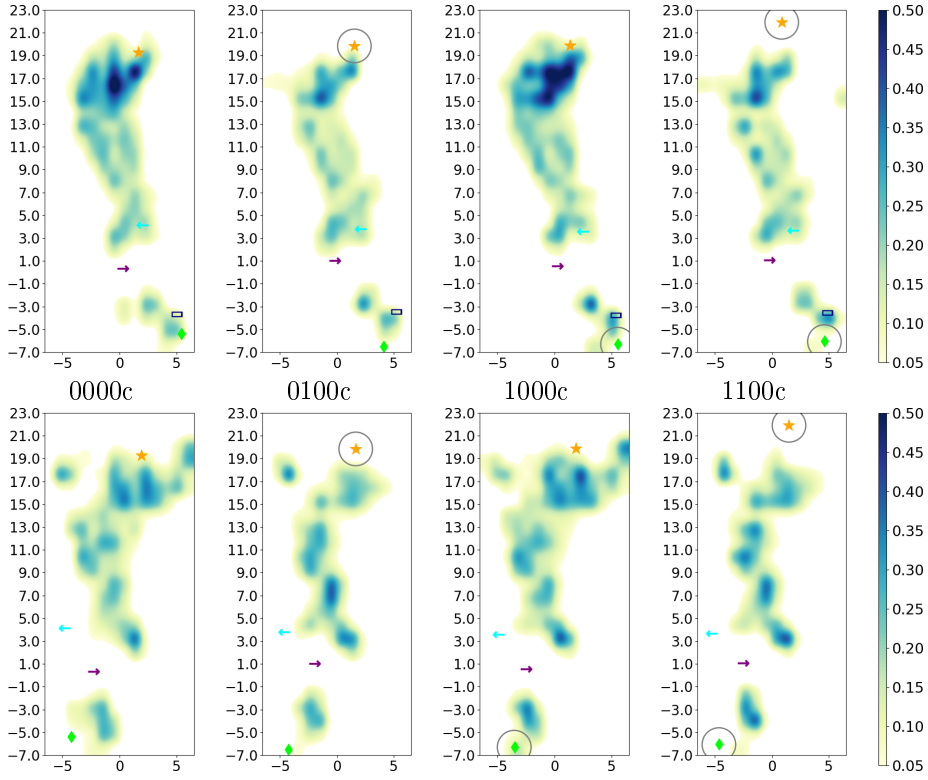

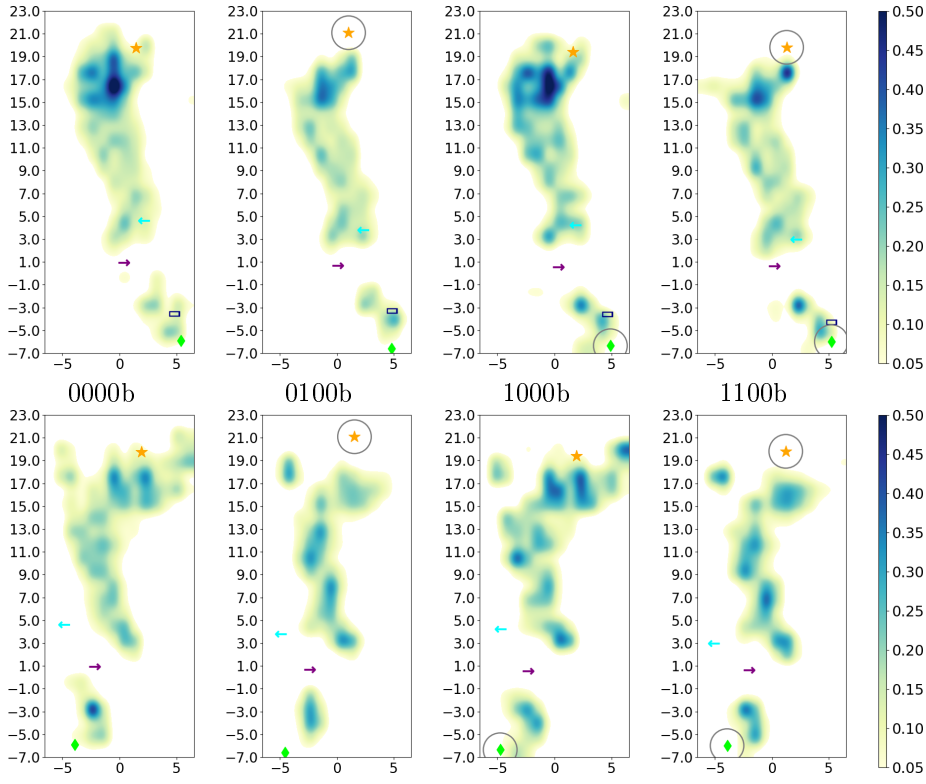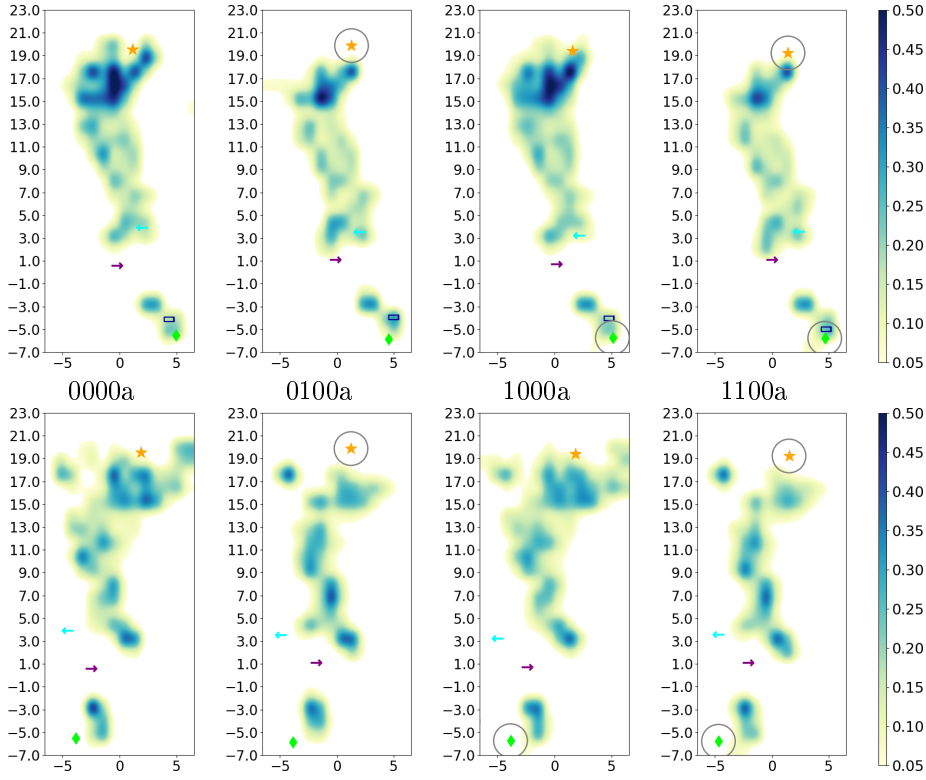

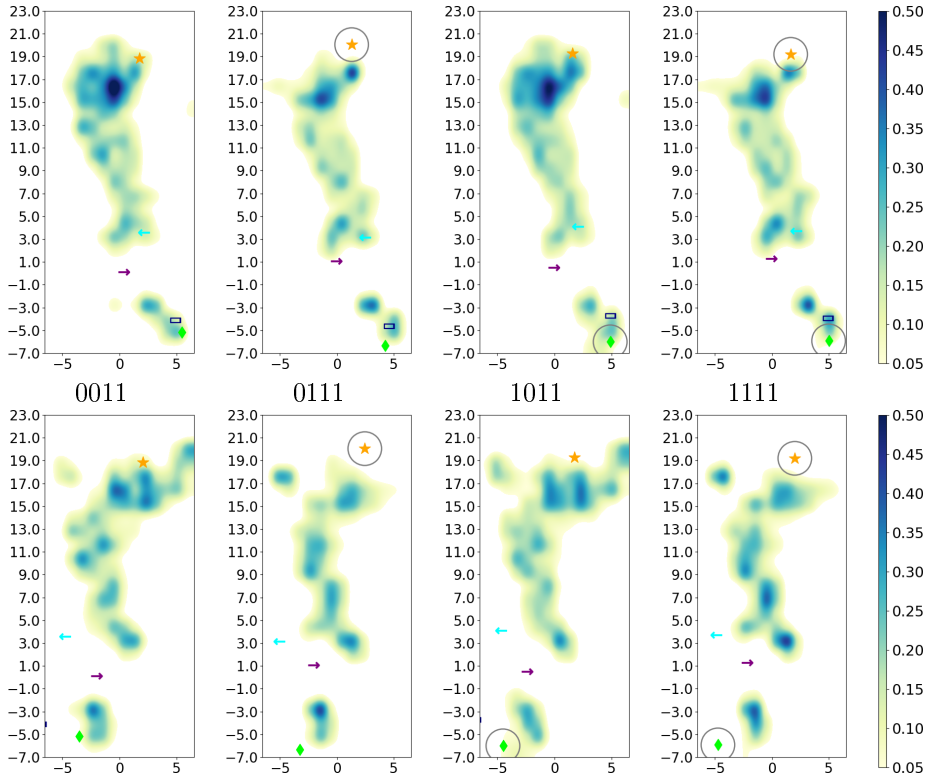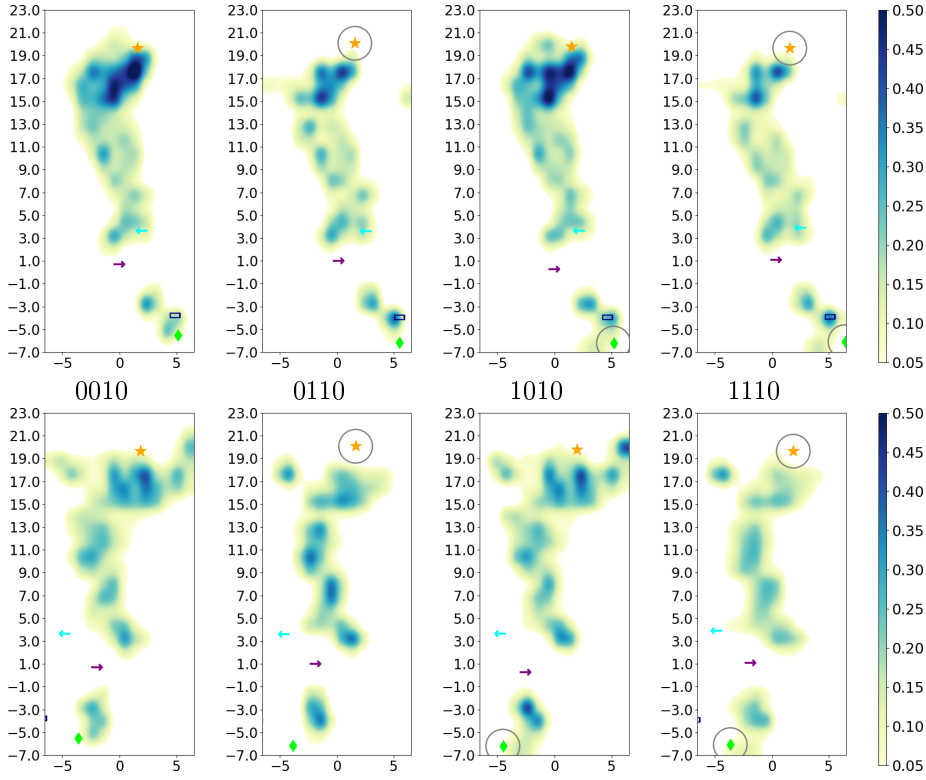

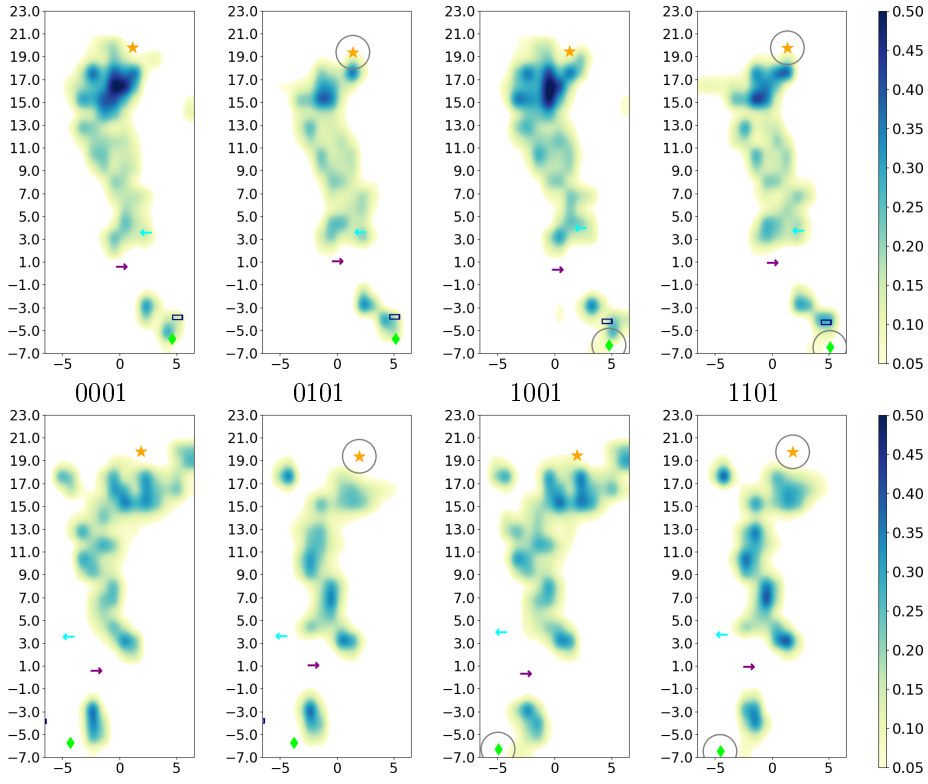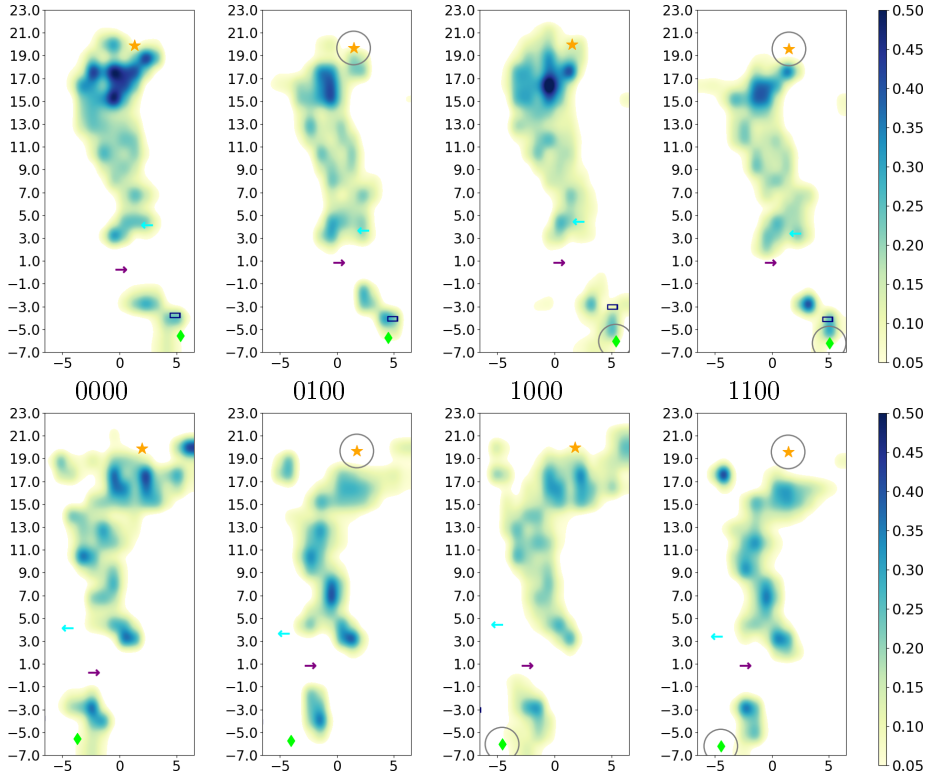

Figure S42: Projection of water occupancy in the D-channel of CcO with most important protonation states. The symbols mark the average height of protein residues H26 (dark blue rectangle ) , N121 (cyan arrow-left ) , D132 (lime diamond ) , N139 (purple arrow-right ) , and E286 (orange star ) . Residues with an excess proton are marked by a grey circle around the symbols representing the respective residues.

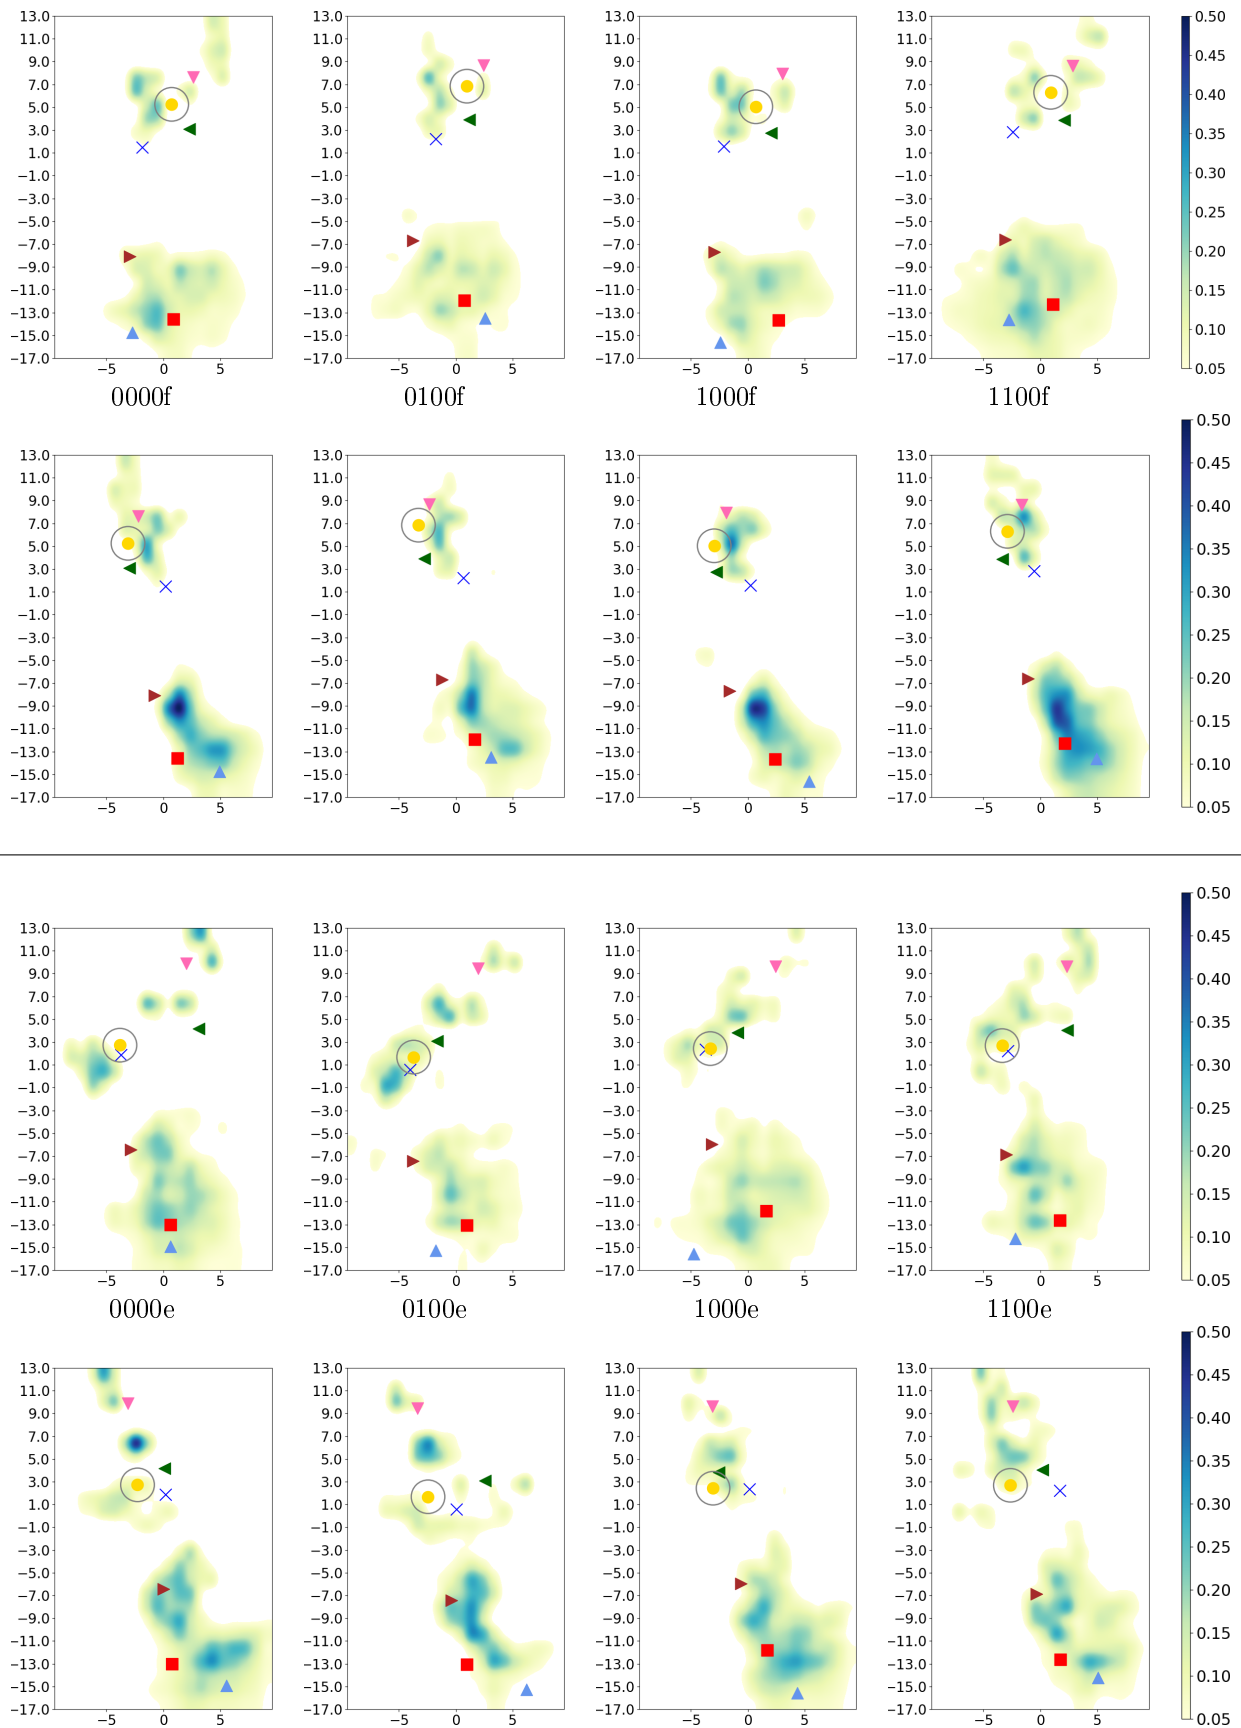

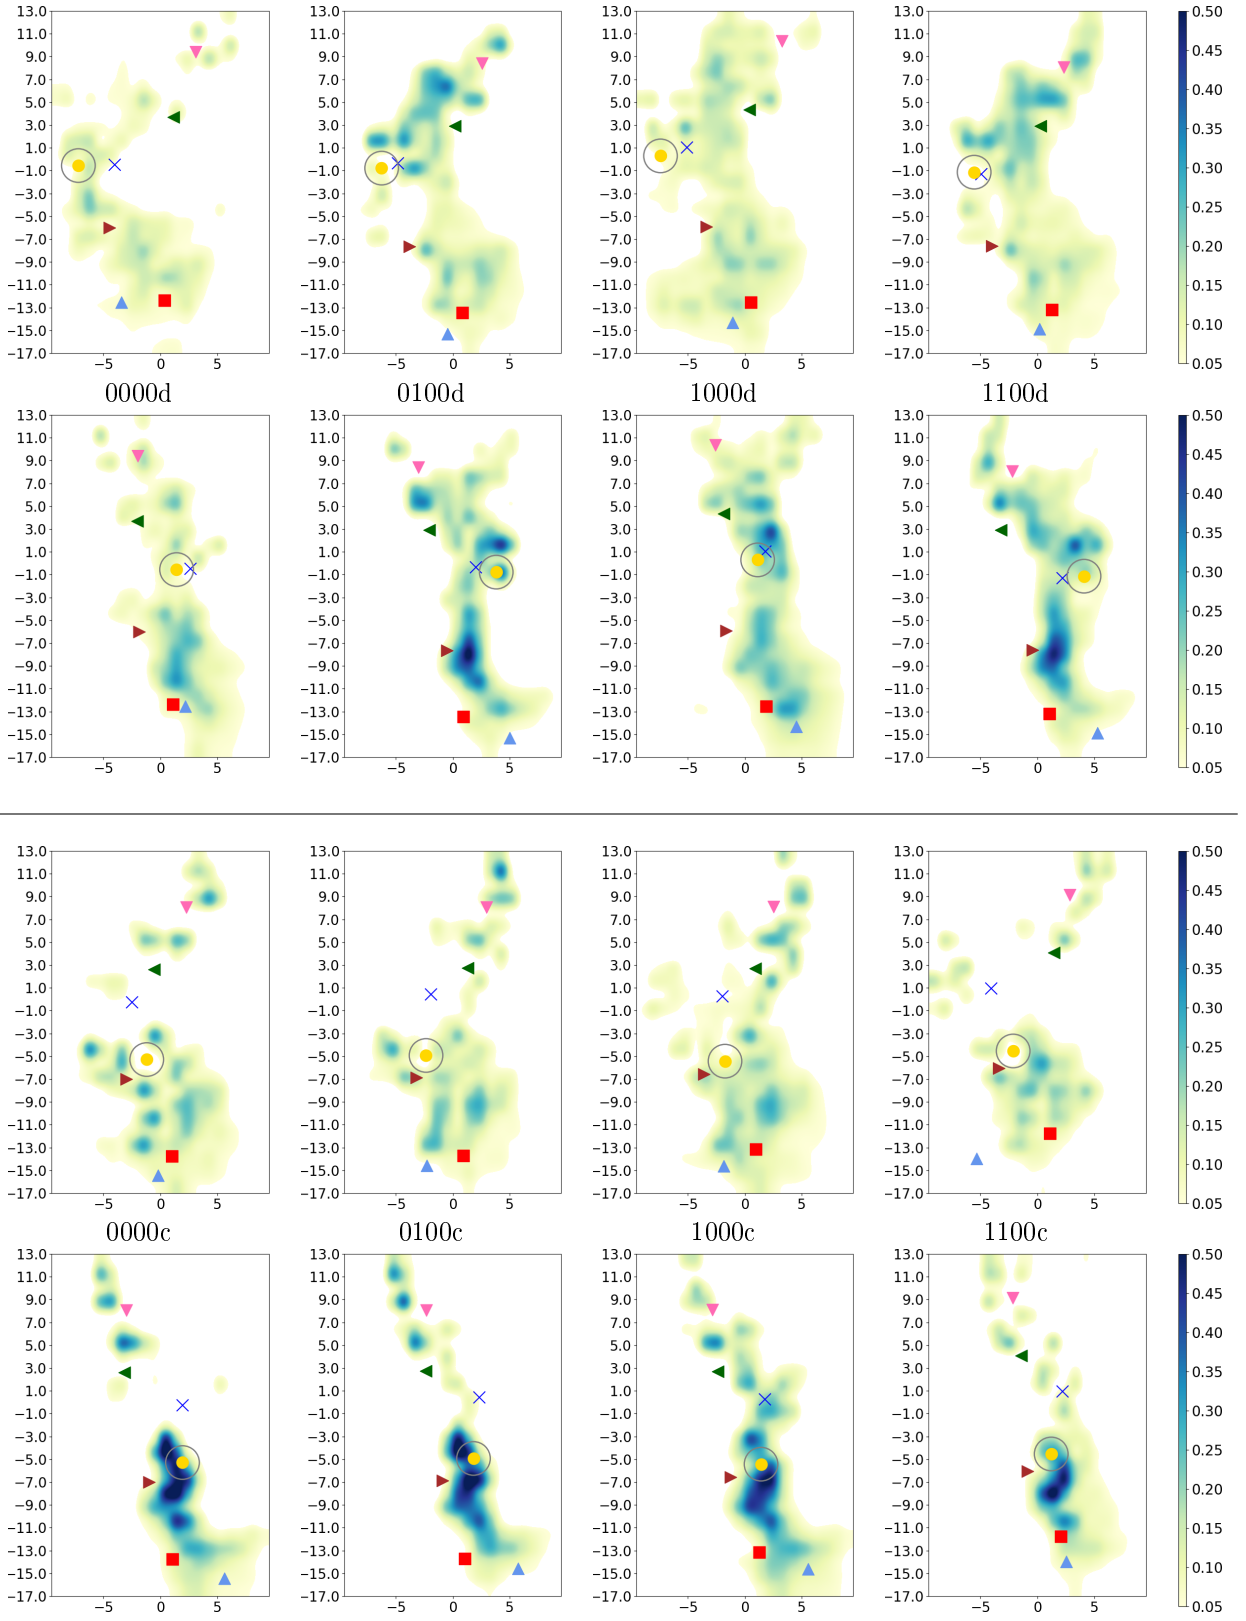

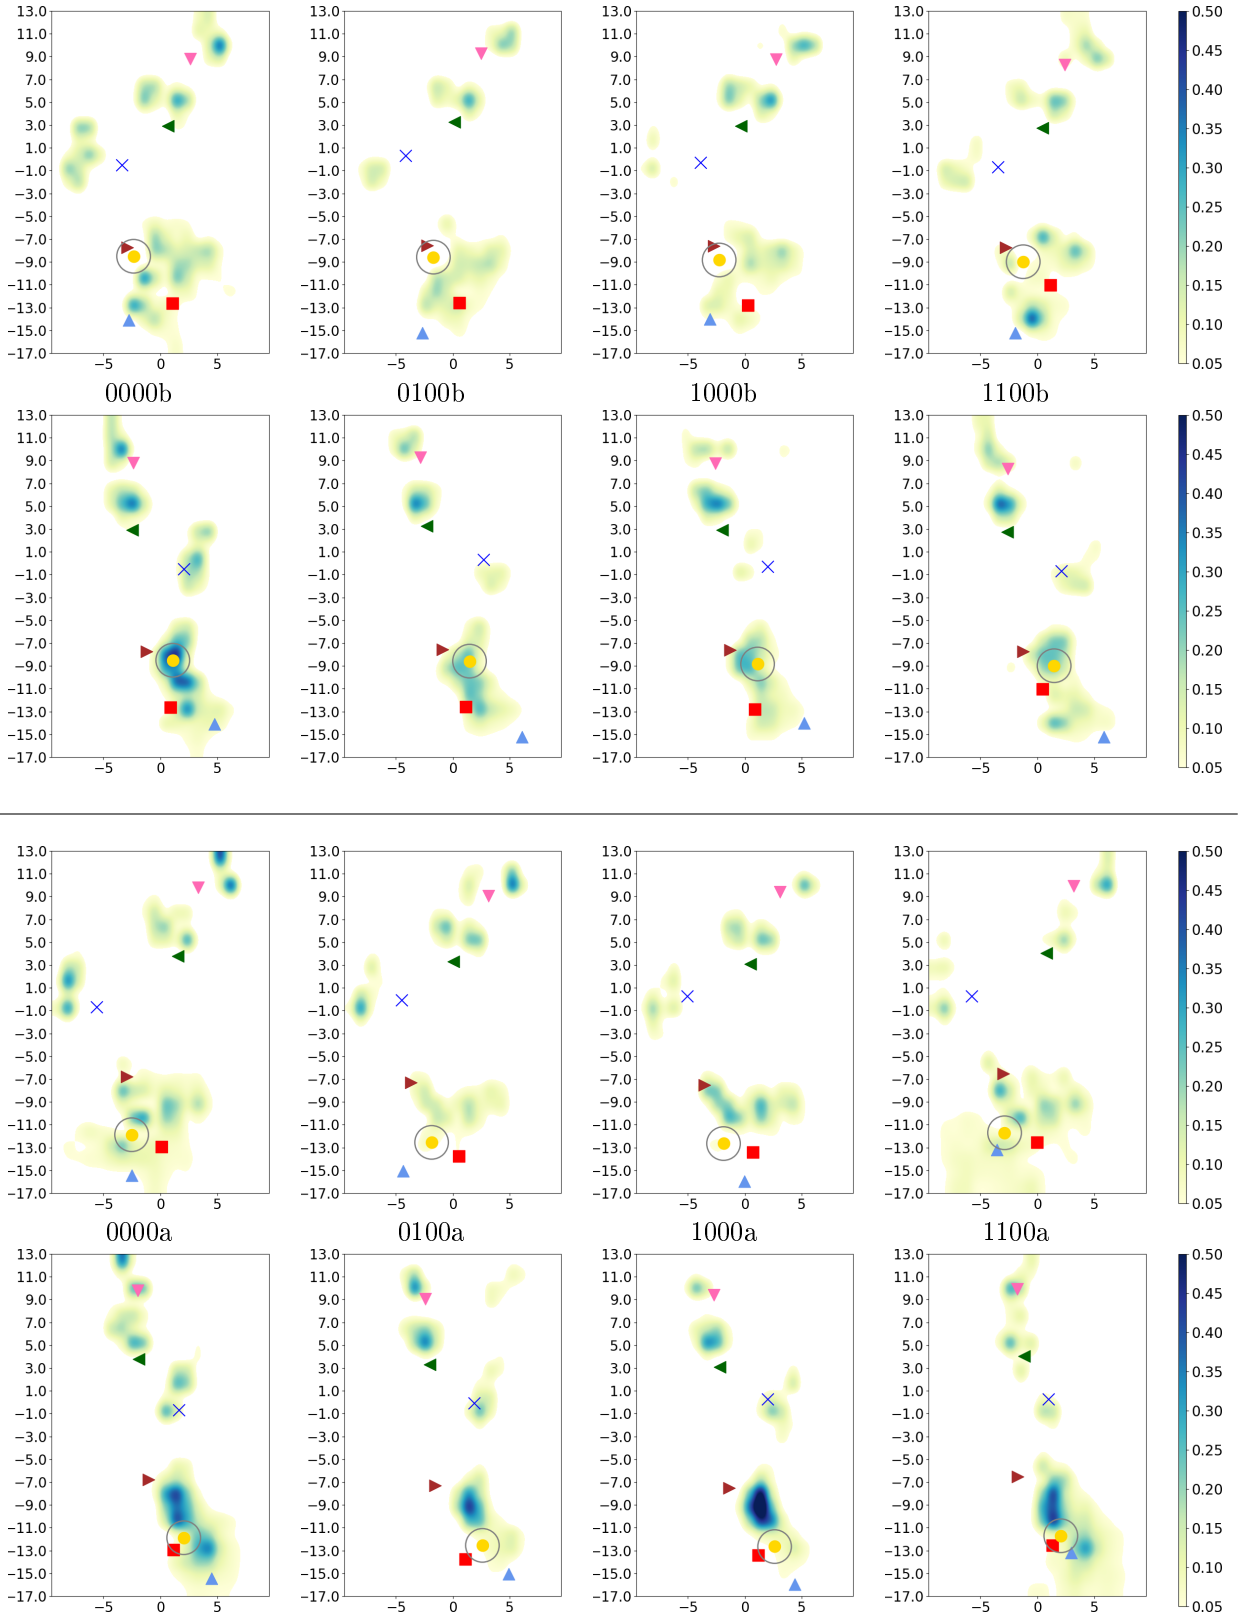



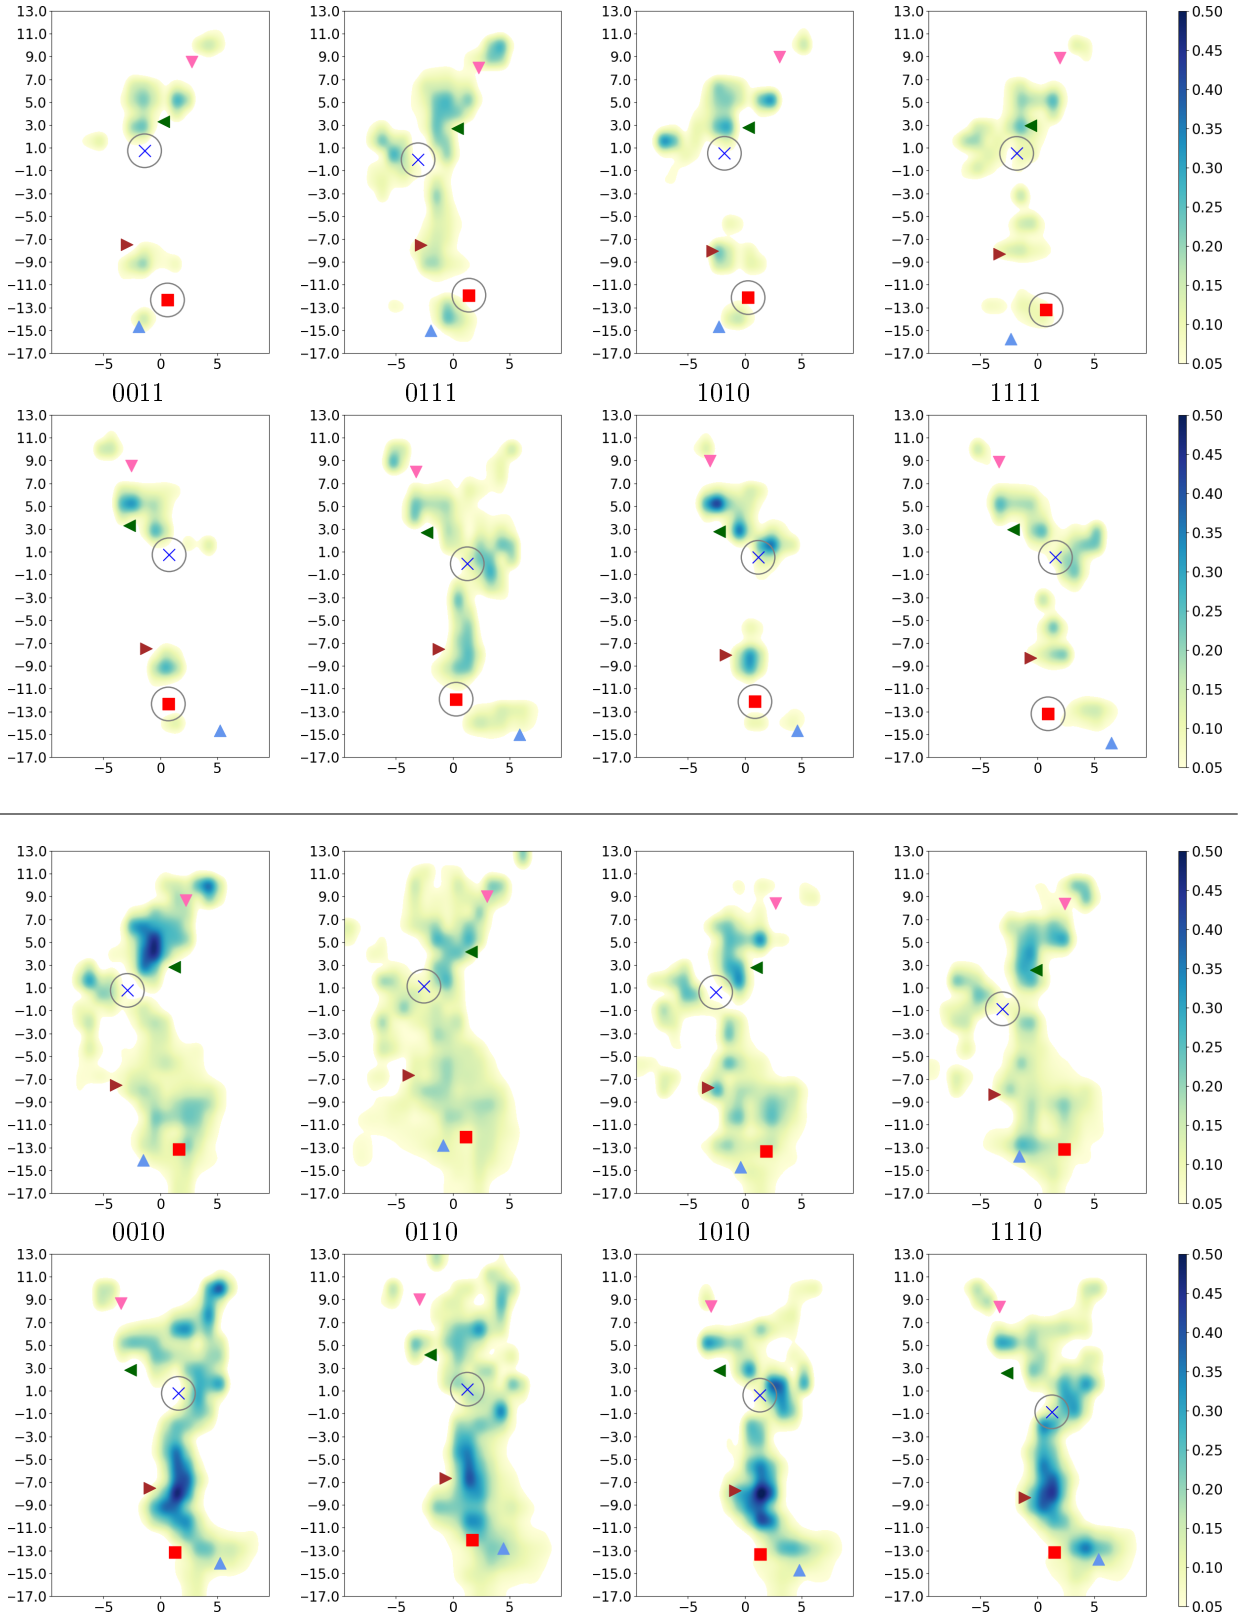

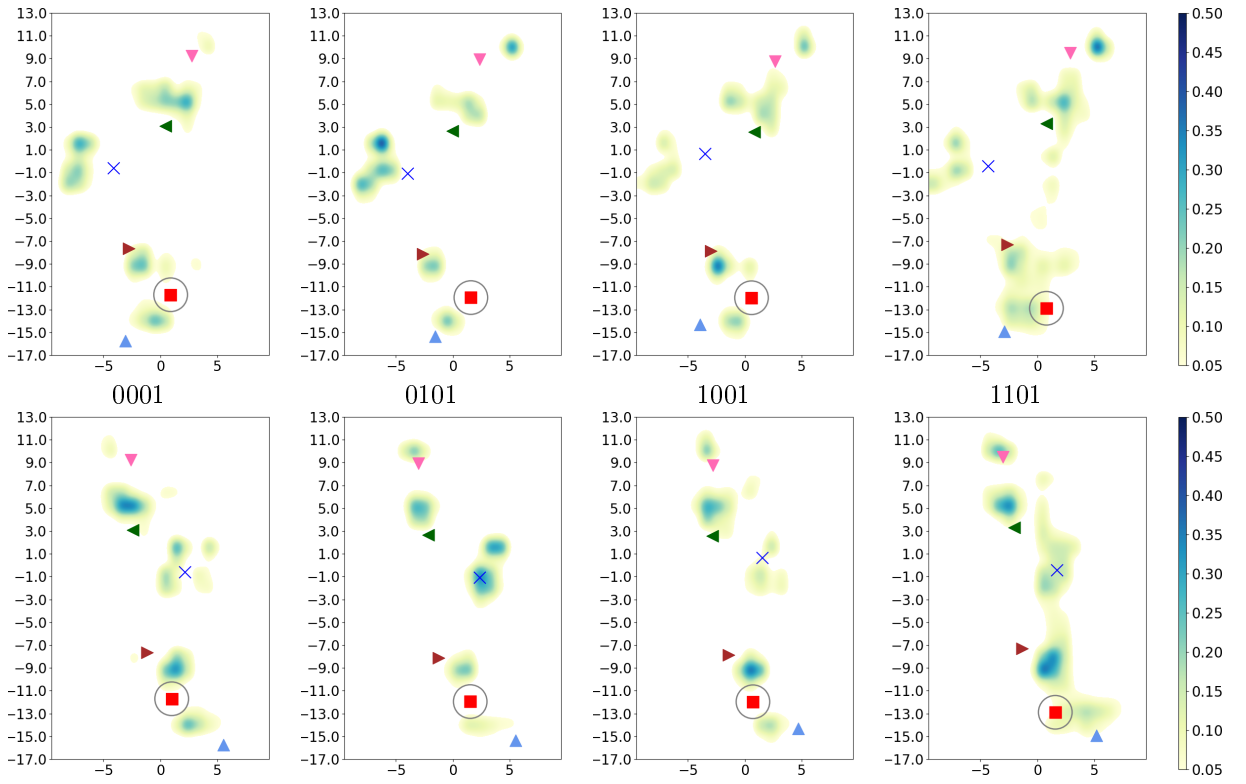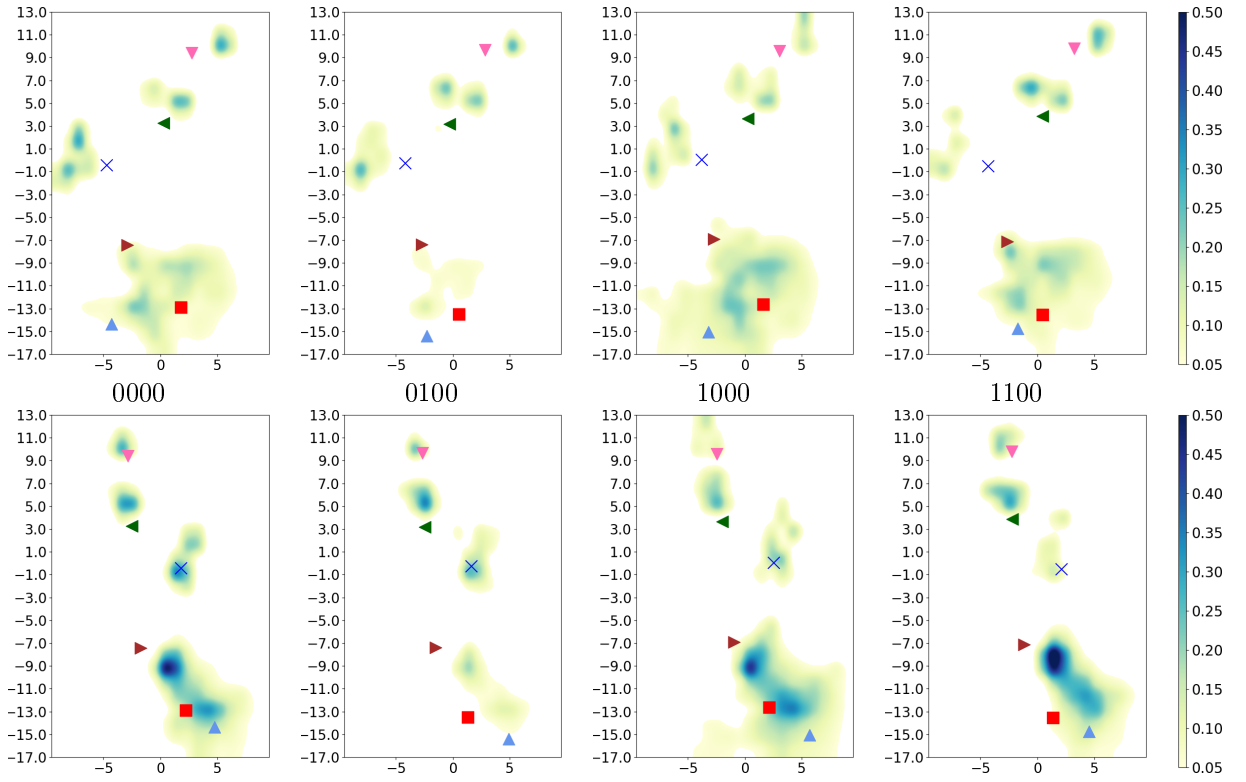

Figure S43: Projection of water occupancy in the K-channel of CcO with most important protonation states. The symbols mark the average height of protein residues H96 (light blue triangle ▲), E101 (red square ■), S365 (brown triangle-right ►), K362 (blue cross ✕), T359 (green triangle-left ◄), Y288 (magenta triangle-down ▼). Residues with an excess proton are marked by a grey circle around the symbols representing the respective residues.

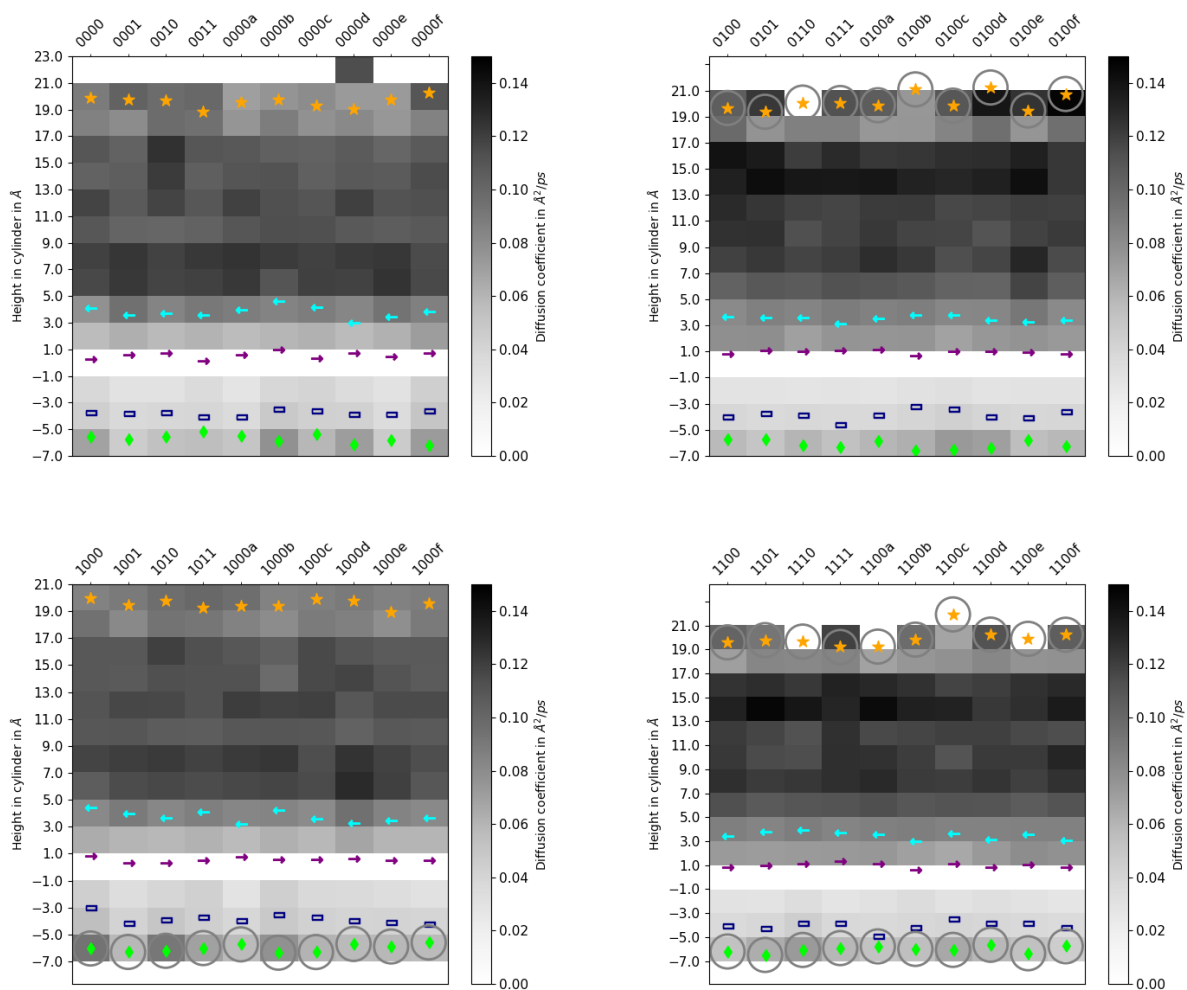

Figure S44: Mobility of water molecules in the D-channel, discretised by cylinder height for different protonation models of the D-channel of CcO. The symbols mark the average height of protein residues H26 (navy rectangle  $\blacksquare$ ), N121 (cyan arrow-left  $\leftarrow$ ), D132 (lime diamond  $\blacklozenge$ ), N139 (purple arrow-right  $\rightarrow$ ), and E286 (orange star  $\star$ ). Residues with an excess proton are marked by a grey circle around the symbols representing the respective residues.

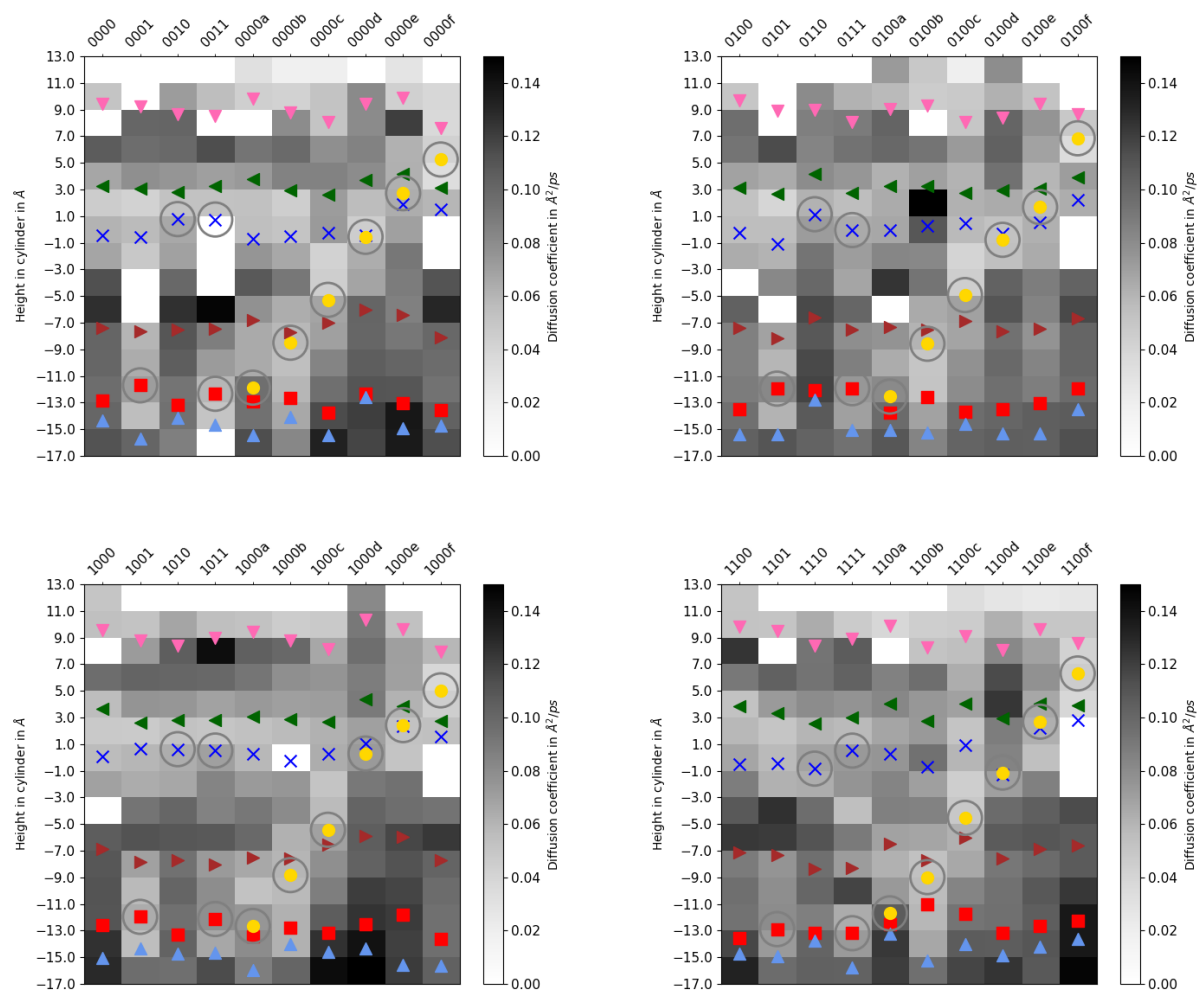

Figure S45: Mobility of water molecules in the K-channel, discretised by cylinder height for different protonation models of the K-channel of CcO. The symbols mark the average height of protein residues H96 (light blue triangle  $\blacktriangle$ ), E101 (red square  $\blacksquare$ ), S365 (brown triangle-right  $\blacktriangleright$ ), K362 (blue cross  $\times$ ), T359 (green triangle-left  $\blacktriangleleft$ ), Y288 (magenta triangle-down  $\blacktriangledown$ ), and position of the  $\text{H}_3\text{O}^+$  ion (yellow circle  $\bullet$ ), if present. Residues with an excess proton are marked by a grey circle around the symbols representing the respective residues.

### 3 Hydrogen bonds

Table S10: Average number of hydrogen bonds between protein residues and water in the D-channel.

| System | H26           | N121          | D123          | N139          | E286          |
|--------|---------------|---------------|---------------|---------------|---------------|
| 0000f  | $1.0 \pm 0.0$ | $1.2 \pm 0.2$ | $0.8 \pm 0.4$ | $1.4 \pm 0.1$ | $4.5 \pm 0.2$ |
| 0000e  | $1.0 \pm 0.0$ | $0.9 \pm 0.5$ | $0.3 \pm 0.3$ | $1.5 \pm 0.2$ | $4.6 \pm 0.2$ |
| 0000d  | $1.0 \pm 0.0$ | $1.1 \pm 0.1$ | $0.5 \pm 0.3$ | $1.4 \pm 0.0$ | $4.9 \pm 0.2$ |
| 0000c  | $1.0 \pm 0.0$ | $1.2 \pm 0.1$ | $0.6 \pm 0.2$ | $1.4 \pm 0.1$ | $4.7 \pm 0.1$ |
| 0000b  | $1.0 \pm 0.0$ | $1.2 \pm 0.2$ | $0.5 \pm 0.3$ | $1.4 \pm 0.0$ | $4.5 \pm 0.1$ |
| 0000a  | $0.9 \pm 0.0$ | $1.1 \pm 0.3$ | $0.3 \pm 0.2$ | $1.4 \pm 0.1$ | $4.9 \pm 0.1$ |
| 0011   | $0.9 \pm 0.0$ | $1.0 \pm 0.2$ | $0.4 \pm 0.2$ | $1.4 \pm 0.1$ | $4.5 \pm 0.2$ |
| 0010   | $1.0 \pm 0.0$ | $0.8 \pm 0.4$ | $0.5 \pm 0.2$ | $1.5 \pm 0.1$ | $4.8 \pm 0.1$ |
| 0001   | $0.9 \pm 0.0$ | $0.9 \pm 0.4$ | $0.5 \pm 0.3$ | $1.4 \pm 0.2$ | $4.6 \pm 0.1$ |
| 0000   | $1.0 \pm 0.1$ | $1.1 \pm 0.2$ | $0.7 \pm 0.1$ | $1.4 \pm 0.1$ | $4.9 \pm 0.1$ |
| 0100f  | $0.9 \pm 0.0$ | $0.9 \pm 0.2$ | $0.7 \pm 0.1$ | $1.8 \pm 0.0$ | $1.2 \pm 0.2$ |
| 0100e  | $0.9 \pm 0.0$ | $0.7 \pm 0.1$ | $0.7 \pm 0.1$ | $1.8 \pm 0.0$ | $1.3 \pm 0.2$ |
| 0100d  | $0.9 \pm 0.0$ | $0.7 \pm 0.1$ | $0.6 \pm 0.1$ | $1.9 \pm 0.1$ | $1.3 \pm 0.1$ |
| 0100c  | $0.9 \pm 0.0$ | $0.8 \pm 0.1$ | $0.9 \pm 0.3$ | $1.8 \pm 0.1$ | $1.2 \pm 0.3$ |
| 0100b  | $0.9 \pm 0.0$ | $0.7 \pm 0.2$ | $0.8 \pm 0.0$ | $1.7 \pm 0.3$ | $1.3 \pm 0.1$ |
| 0100a  | $0.9 \pm 0.0$ | $0.7 \pm 0.1$ | $0.6 \pm 0.1$ | $1.9 \pm 0.0$ | $1.4 \pm 0.0$ |
| 0111   | $0.9 \pm 0.0$ | $0.6 \pm 0.1$ | $0.8 \pm 0.1$ | $1.9 \pm 0.0$ | $1.2 \pm 0.3$ |
| 0110   | $0.9 \pm 0.0$ | $0.7 \pm 0.1$ | $0.8 \pm 0.1$ | $1.9 \pm 0.0$ | $1.4 \pm 0.1$ |
| 0101   | $0.9 \pm 0.0$ | $0.6 \pm 0.1$ | $0.6 \pm 0.0$ | $1.9 \pm 0.0$ | $1.3 \pm 0.1$ |
| 0100   | $0.9 \pm 0.0$ | $0.8 \pm 0.1$ | $0.7 \pm 0.1$ | $1.9 \pm 0.0$ | $1.6 \pm 0.1$ |
| 1000f  | $0.9 \pm 0.0$ | $1.2 \pm 0.2$ | $0.1 \pm 0.0$ | $1.4 \pm 0.1$ | $4.5 \pm 0.1$ |
| 1000e  | $0.9 \pm 0.0$ | $1.1 \pm 0.1$ | $0.2 \pm 0.1$ | $1.5 \pm 0.1$ | $4.6 \pm 0.2$ |
| 1000d  | $0.9 \pm 0.0$ | $0.7 \pm 0.2$ | $0.2 \pm 0.0$ | $1.6 \pm 0.1$ | $4.8 \pm 0.2$ |
| 1000c  | $0.9 \pm 0.0$ | $1.2 \pm 0.1$ | $0.2 \pm 0.1$ | $1.5 \pm 0.0$ | $4.8 \pm 0.0$ |
| 1000b  | $1.0 \pm 0.0$ | $1.3 \pm 0.0$ | $0.2 \pm 0.1$ | $1.3 \pm 0.1$ | $4.6 \pm 0.2$ |
| 1000a  | $0.9 \pm 0.0$ | $0.9 \pm 0.1$ | $0.1 \pm 0.1$ | $1.5 \pm 0.0$ | $4.8 \pm 0.2$ |
| 1011   | $0.9 \pm 0.0$ | $1.1 \pm 0.1$ | $0.2 \pm 0.1$ | $1.4 \pm 0.1$ | $4.5 \pm 0.2$ |
| 1010   | $0.7 \pm 0.4$ | $0.7 \pm 0.3$ | $0.2 \pm 0.1$ | $1.1 \pm 0.6$ | $3.2 \pm 1.9$ |
| 1001   | $0.9 \pm 0.0$ | $1.3 \pm 0.1$ | $0.2 \pm 0.1$ | $1.4 \pm 0.1$ | $4.7 \pm 0.1$ |
| 1000   | $0.6 \pm 0.4$ | $0.9 \pm 0.4$ | $0.2 \pm 0.1$ | $1.0 \pm 0.6$ | $3.1 \pm 2.2$ |
| 1100f  | $0.9 \pm 0.0$ | $0.8 \pm 0.0$ | $0.1 \pm 0.0$ | $1.9 \pm 0.0$ | $1.3 \pm 0.1$ |
| 1100e  | $0.9 \pm 0.0$ | $0.8 \pm 0.0$ | $0.1 \pm 0.0$ | $1.9 \pm 0.0$ | $1.3 \pm 0.1$ |
| 1100d  | $0.8 \pm 0.2$ | $0.8 \pm 0.0$ | $0.2 \pm 0.1$ | $1.8 \pm 0.1$ | $1.3 \pm 0.3$ |
| 1100c  | $0.9 \pm 0.0$ | $0.7 \pm 0.1$ | $0.1 \pm 0.0$ | $1.8 \pm 0.1$ | $1.2 \pm 0.1$ |
| 1100b  | $0.8 \pm 0.1$ | $0.9 \pm 0.1$ | $0.2 \pm 0.1$ | $1.6 \pm 0.2$ | $1.3 \pm 0.1$ |
| 1100a  | $0.9 \pm 0.0$ | $0.7 \pm 0.1$ | $0.2 \pm 0.0$ | $1.9 \pm 0.0$ | $1.2 \pm 0.1$ |
| 1111   | $0.9 \pm 0.0$ | $0.8 \pm 0.1$ | $0.1 \pm 0.0$ | $1.9 \pm 0.0$ | $1.5 \pm 0.0$ |
| 1110   | $0.1 \pm 0.1$ | $0.7 \pm 0.1$ | $0.0 \pm 0.0$ | $0.8 \pm 0.1$ | $0.8 \pm 0.3$ |
| 1101   | $0.9 \pm 0.0$ | $0.8 \pm 0.2$ | $0.1 \pm 0.0$ | $1.8 \pm 0.1$ | $1.3 \pm 0.0$ |
| 1100   | $0.9 \pm 0.0$ | $0.9 \pm 0.2$ | $0.1 \pm 0.0$ | $1.8 \pm 0.1$ | $1.4 \pm 0.1$ |

Table S11: Average number of hydrogen bonds between protein residues and water in the K-channel.

| Model | Y288          | T359          | K362          | S365          | H96           | E101          |
|-------|---------------|---------------|---------------|---------------|---------------|---------------|
| 0000f | $0.9 \pm 0.7$ | $0.0 \pm 0.0$ | $0.8 \pm 0.1$ | $0.8 \pm 0.1$ | $0.3 \pm 0.1$ | $3.4 \pm 0.4$ |
| 0000e | $1.3 \pm 0.3$ | $0.7 \pm 0.5$ | $0.2 \pm 0.0$ | $1.2 \pm 0.0$ | $0.5 \pm 0.3$ | $3.6 \pm 0.3$ |
| 0000d | $1.0 \pm 0.1$ | $1.1 \pm 0.7$ | $0.6 \pm 0.2$ | $1.0 \pm 0.1$ | $0.3 \pm 0.3$ | $3.0 \pm 0.9$ |
| 0000c | $1.4 \pm 0.2$ | $1.3 \pm 0.2$ | $0.7 \pm 0.1$ | $0.8 \pm 0.1$ | $0.4 \pm 0.1$ | $3.5 \pm 0.4$ |
| 0000b | $1.0 \pm 0.1$ | $1.1 \pm 0.2$ | $0.8 \pm 0.1$ | $0.0 \pm 0.0$ | $0.2 \pm 0.0$ | $2.7 \pm 0.2$ |
| 0000a | $1.0 \pm 0.1$ | $1.1 \pm 0.1$ | $0.8 \pm 0.0$ | $0.9 \pm 0.0$ | $0.2 \pm 0.2$ | $1.8 \pm 0.8$ |
| 0011  | $0.7 \pm 0.5$ | $1.7 \pm 0.0$ | $1.0 \pm 0.0$ | $0.8 \pm 0.1$ | $0.0 \pm 0.0$ | $0.8 \pm 0.7$ |
| 0010  | $0.9 \pm 0.1$ | $1.4 \pm 0.1$ | $2.5 \pm 0.1$ | $0.9 \pm 0.0$ | $0.2 \pm 0.0$ | $3.3 \pm 0.3$ |
| 0001  | $0.3 \pm 0.3$ | $1.1 \pm 0.1$ | $0.9 \pm 0.0$ | $0.9 \pm 0.0$ | $0.1 \pm 0.0$ | $1.5 \pm 0.4$ |
| 0000  | $0.7 \pm 0.1$ | $1.0 \pm 0.0$ | $0.9 \pm 0.0$ | $0.7 \pm 0.1$ | $0.4 \pm 0.1$ | $3.0 \pm 0.6$ |
| 0100f | $0.0 \pm 0.0$ | $0.2 \pm 0.3$ | $0.6 \pm 0.3$ | $0.9 \pm 0.3$ | $0.3 \pm 0.1$ | $3.3 \pm 0.8$ |
| 0100e | $1.0 \pm 0.3$ | $1.0 \pm 0.0$ | $0.4 \pm 0.1$ | $1.2 \pm 0.2$ | $0.2 \pm 0.0$ | $2.7 \pm 0.1$ |
| 0100d | $1.0 \pm 0.1$ | $1.7 \pm 0.0$ | $0.6 \pm 0.7$ | $1.1 \pm 0.3$ | $0.3 \pm 0.1$ | $3.2 \pm 0.2$ |
| 0100c | $1.7 \pm 0.3$ | $1.3 \pm 0.3$ | $0.4 \pm 0.2$ | $0.4 \pm 0.3$ | $0.3 \pm 0.1$ | $3.4 \pm 0.6$ |
| 0100b | $0.9 \pm 0.0$ | $1.1 \pm 0.0$ | $0.7 \pm 0.2$ | $0.0 \pm 0.0$ | $0.1 \pm 0.1$ | $2.7 \pm 0.9$ |
| 0100a | $0.8 \pm 0.1$ | $1.1 \pm 0.1$ | $0.8 \pm 0.1$ | $0.6 \pm 0.4$ | $0.1 \pm 0.1$ | $0.8 \pm 0.7$ |
| 0111  | $1.1 \pm 0.3$ | $1.6 \pm 0.1$ | $2.6 \pm 0.1$ | $0.8 \pm 0.0$ | $0.1 \pm 0.0$ | $1.3 \pm 0.2$ |
| 0110  | $1.0 \pm 0.1$ | $1.6 \pm 0.2$ | $2.5 \pm 0.1$ | $1.1 \pm 0.1$ | $0.4 \pm 0.0$ | $4.1 \pm 0.6$ |
| 0101  | $0.5 \pm 0.4$ | $1.0 \pm 0.2$ | $0.9 \pm 0.1$ | $0.7 \pm 0.1$ | $0.1 \pm 0.1$ | $1.0 \pm 0.7$ |
| 0100  | $0.5 \pm 0.4$ | $1.1 \pm 0.2$ | $0.8 \pm 0.1$ | $0.3 \pm 0.4$ | $0.1 \pm 0.1$ | $1.1 \pm 1.4$ |
| 1000f | $0.5 \pm 0.6$ | $0.0 \pm 0.0$ | $0.8 \pm 0.1$ | $0.8 \pm 0.0$ | $0.3 \pm 0.1$ | $3.1 \pm 0.2$ |
| 1000e | $1.0 \pm 0.3$ | $1.0 \pm 0.1$ | $0.4 \pm 0.3$ | $0.9 \pm 0.3$ | $0.5 \pm 0.1$ | $4.0 \pm 0.9$ |
| 1000d | $0.8 \pm 0.2$ | $1.6 \pm 0.2$ | $0.5 \pm 0.3$ | $1.0 \pm 0.1$ | $0.3 \pm 0.2$ | $3.6 \pm 1.0$ |
| 1000c | $1.6 \pm 0.4$ | $1.7 \pm 0.1$ | $0.9 \pm 0.3$ | $0.8 \pm 0.1$ | $0.4 \pm 0.1$ | $3.8 \pm 0.6$ |
| 1000b | $1.1 \pm 0.1$ | $1.3 \pm 0.1$ | $0.4 \pm 0.3$ | $0.0 \pm 0.0$ | $0.1 \pm 0.0$ | $2.3 \pm 0.4$ |
| 1000a | $0.5 \pm 0.3$ | $1.0 \pm 0.1$ | $0.7 \pm 0.3$ | $0.9 \pm 0.0$ | $0.0 \pm 0.0$ | $1.1 \pm 0.2$ |
| 1011  | $0.5 \pm 0.4$ | $1.8 \pm 0.1$ | $1.7 \pm 0.3$ | $0.8 \pm 0.1$ | $0.1 \pm 0.1$ | $1.0 \pm 0.7$ |
| 1010  | $0.6 \pm 0.6$ | $1.6 \pm 0.2$ | $2.6 \pm 0.1$ | $1.2 \pm 0.2$ | $0.3 \pm 0.0$ | $3.4 \pm 0.3$ |
| 1001  | $0.6 \pm 0.4$ | $1.2 \pm 0.3$ | $0.6 \pm 0.4$ | $0.9 \pm 0.0$ | $0.1 \pm 0.0$ | $1.3 \pm 0.6$ |
| 1000  | $0.7 \pm 0.1$ | $1.1 \pm 0.1$ | $0.8 \pm 0.2$ | $0.9 \pm 0.1$ | $0.5 \pm 0.2$ | $3.6 \pm 0.6$ |
| 1100f | $1.0 \pm 0.4$ | $0.0 \pm 0.0$ | $0.8 \pm 0.1$ | $0.8 \pm 0.1$ | $0.6 \pm 0.3$ | $4.4 \pm 0.6$ |
| 1100e | $1.5 \pm 0.3$ | $1.0 \pm 0.1$ | $0.4 \pm 0.1$ | $1.1 \pm 0.1$ | $0.4 \pm 0.3$ | $3.5 \pm 0.7$ |
| 1100d | $2.1 \pm 0.1$ | $1.7 \pm 0.1$ | $0.3 \pm 0.2$ | $1.1 \pm 0.3$ | $0.4 \pm 0.1$ | $2.9 \pm 0.9$ |
| 1100c | $1.4 \pm 0.3$ | $1.1 \pm 0.1$ | $0.9 \pm 0.1$ | $0.4 \pm 0.2$ | $0.2 \pm 0.0$ | $3.3 \pm 0.4$ |
| 1100b | $1.2 \pm 0.1$ | $1.2 \pm 0.2$ | $0.8 \pm 0.0$ | $0.3 \pm 0.3$ | $0.2 \pm 0.1$ | $2.6 \pm 0.5$ |
| 1100a | $1.0 \pm 0.1$ | $0.9 \pm 0.1$ | $0.8 \pm 0.0$ | $0.9 \pm 0.0$ | $0.3 \pm 0.2$ | $1.7 \pm 0.5$ |
| 1111  | $0.6 \pm 0.3$ | $1.7 \pm 0.0$ | $2.0 \pm 0.5$ | $0.6 \pm 0.2$ | $0.2 \pm 0.0$ | $0.6 \pm 0.1$ |
| 1110  | $1.3 \pm 0.2$ | $1.7 \pm 0.1$ | $2.6 \pm 0.1$ | $1.2 \pm 0.1$ | $0.2 \pm 0.1$ | $3.3 \pm 0.7$ |
| 1101  | $0.9 \pm 0.1$ | $1.4 \pm 0.2$ | $0.6 \pm 0.4$ | $0.9 \pm 0.0$ | $0.2 \pm 0.2$ | $1.2 \pm 0.4$ |
| 1100  | $0.8 \pm 0.1$ | $1.1 \pm 0.1$ | $0.6 \pm 0.4$ | $0.9 \pm 0.0$ | $0.3 \pm 0.1$ | $3.1 \pm 0.5$ |

Table S12: Life times (in ps) of hydrogen bonds between protein residues in the D-channel and water molecules inside the channel. N/A indicates life times that are computed to be longer than the simulation time or have an error that is larger than the computed average value.

| Model | H26             | N121           | D132            | N139             | E286                   |
|-------|-----------------|----------------|-----------------|------------------|------------------------|
| 0000f | 54.0 $\pm$ 10.0 | 27.5 $\pm$ 3.5 | 52.6 $\pm$ 17.3 | 57.3 $\pm$ 23.3  | 71950.0 $\pm$ 65307.2  |
| 0000e | N/A             | 21.0 $\pm$ 6.1 | 27.2 $\pm$ 2.7  | 107.3 $\pm$ 72.2 | N/A                    |
| 0000d | 58.8 $\pm$ 5.7  | 21.9 $\pm$ 1.5 | 54.4 $\pm$ 8.4  | 51.4 $\pm$ 6.5   | 114799.2 $\pm$ 63923.6 |
| 0000c | 53.6 $\pm$ 3.6  | 20.7 $\pm$ 1.4 | 44.3 $\pm$ 13.8 | 51.7 $\pm$ 20.1  | N/A                    |
| 0000b | 55.7 $\pm$ 1.4  | 22.0 $\pm$ 1.4 | 45.4 $\pm$ 13.7 | 61.0 $\pm$ 19.4  | 108119.8 $\pm$ 73369.6 |
| 0000a | 53.4 $\pm$ 5.9  | 20.7 $\pm$ 3.8 | <2              | 72.1 $\pm$ 33.5  | 160000.0 $\pm$ 0.0     |
| 0011  | 47.5 $\pm$ 2.8  | 22.9 $\pm$ 3.2 | 28.6 $\pm$ 6.5  | 81.1 $\pm$ 29.4  | N/A                    |
| 0010  | N/A             | 20.1 $\pm$ 5.4 | 34.1 $\pm$ 3.9  | N/A              | 108464.3 $\pm$ 72882.5 |
| 0001  | 51.4 $\pm$ 7.8  | 18.6 $\pm$ 3.4 | <2              | 90.4 $\pm$ 59.5  | 109106.2 $\pm$ 71974.6 |
| 0000  | N/A             | 21.5 $\pm$ 1.2 | 42.4 $\pm$ 9.2  | 60.2 $\pm$ 30.3  | 160000.0 $\pm$ 0.0     |
| 0100f | 40.0 $\pm$ 4.7  | 12.4 $\pm$ 5.3 | 28.7 $\pm$ 4.8  | N/A              | 77.4 $\pm$ 19.2        |
| 0100e | 44.1 $\pm$ 3.1  | 9.6 $\pm$ 1.5  | 29.1 $\pm$ 5.2  | 139.8 $\pm$ 2.3  | 57.9 $\pm$ 17.7        |
| 0100d | 39.0 $\pm$ 3.0  | 9.5 $\pm$ 0.6  | 29.4 $\pm$ 10.1 | N/A              | 72.0 $\pm$ 18.5        |
| 0100c | 44.1 $\pm$ 1.6  | 10.5 $\pm$ 2.3 | 41.2 $\pm$ 18.3 | N/A              | 50.6 $\pm$ 24.1        |
| 0100b | N/A             | 14.6 $\pm$ 9.3 | 46.3 $\pm$ 2.8  | N/A              | 57.1 $\pm$ 9.3         |
| 0100a | 43.8 $\pm$ 4.0  | 8.4 $\pm$ 0.9  | 27.1 $\pm$ 5.1  | N/A              | 70.8 $\pm$ 16.8        |
| 0111  | 41.5 $\pm$ 1.8  | 9.1 $\pm$ 0.5  | 38.9 $\pm$ 6.8  | 172.4 $\pm$ 38.4 | 58.0 $\pm$ 30.8        |
| 0110  | 40.7 $\pm$ 4.3  | 10.7 $\pm$ 2.6 | 39.5 $\pm$ 9.4  | 203.8 $\pm$ 38.2 | 63.4 $\pm$ 10.7        |
| 0101  | 45.7 $\pm$ 3.3  | 7.3 $\pm$ 0.4  | 32.5 $\pm$ 1.0  | N/A              | 61.1 $\pm$ 6.6         |
| 0100  | N/A             | 8.7 $\pm$ 0.3  | 29.6 $\pm$ 7.4  | 150.3 $\pm$ 19.6 | 96.3 $\pm$ 15.9        |
| 1000f | 37.1 $\pm$ 1.3  | 22.7 $\pm$ 2.5 | <2              | 79.9 $\pm$ 38.1  | N/A                    |
| 1000e | 43.0 $\pm$ 6.1  | 20.7 $\pm$ 0.2 | <2              | 66.7 $\pm$ 20.1  | N/A                    |
| 1000d | 32.9 $\pm$ 8.4  | 15.8 $\pm$ 1.9 | 6.3 $\pm$ 0.5   | 109.8 $\pm$ 22.9 | 88663.7 $\pm$ 52345.1  |
| 1000c | 46.4 $\pm$ 3.3  | 23.4 $\pm$ 4.1 | <2              | N/A              | 160000.0 $\pm$ 0.0     |
| 1000b | 44.8 $\pm$ 8.1  | 21.4 $\pm$ 2.3 | <2              | 38.9 $\pm$ 6.5   | 71298.0 $\pm$ 65241.2  |
| 1000a | 36.8 $\pm$ 7.7  | 20.4 $\pm$ 1.0 | <2              | 100.9 $\pm$ 18.2 | 160000.0 $\pm$ 0.0     |
| 1011  | 36.9 $\pm$ 1.6  | 22.4 $\pm$ 2.8 | <2              | 53.4 $\pm$ 17.4  | 108182.3 $\pm$ 73281.3 |
| 1010  | 29.4 $\pm$ 19.9 | 15.6 $\pm$ 9.2 | <2              | 57.8 $\pm$ 43.4  | 76373.3 $\pm$ 65519.5  |
| 1001  | 38.3 $\pm$ 4.9  | 23.9 $\pm$ 1.9 | <2              | N/A              | N/A                    |
| 1000  | N/A             | 14.9 $\pm$ 9.5 | <2              | 34.2 $\pm$ 23.0  | N/A                    |
| 1100f | 21.8 $\pm$ 1.8  | 7.8 $\pm$ 0.8  | <2              | N/A              | 65.4 $\pm$ 9.5         |
| 1100e | 25.8 $\pm$ 3.2  | 8.4 $\pm$ 1.3  | <2              | 177.1 $\pm$ 15.6 | 54.4 $\pm$ 8.7         |
| 1100d | 21.5 $\pm$ 1.0  | 9.4 $\pm$ 1.7  | <2              | 150.5 $\pm$ 6.8  | 80.2 $\pm$ 18.7        |
| 1100c | 26.4 $\pm$ 4.5  | 13.6 $\pm$ 3.0 | <2              | 152.9 $\pm$ 35.9 | 45.3 $\pm$ 15.9        |
| 1100b | 32.3 $\pm$ 0.7  | 16.5 $\pm$ 3.8 | 5.6 $\pm$ 2.2   | 120.9 $\pm$ 49.7 | 69.5 $\pm$ 8.7         |
| 1100a | 26.6 $\pm$ 2.1  | 9.6 $\pm$ 1.5  | 6.8 $\pm$ 1.1   | 207.4 $\pm$ 14.7 | 45.6 $\pm$ 13.6        |
| 1111  | 23.2 $\pm$ 1.3  | 7.8 $\pm$ 0.6  | <2              | N/A              | 76.5 $\pm$ 9.7         |
| 1110  | <2              | 10.7 $\pm$ 3.5 | <2              | 11.2 $\pm$ 1.4   | 37.2 $\pm$ 17.7        |
| 1101  | 26.8 $\pm$ 4.1  | 11.8 $\pm$ 4.3 | <2              | 156.7 $\pm$ 33.7 | 59.7 $\pm$ 5.5         |
| 1100  | 29.3 $\pm$ 6.5  | 14.1 $\pm$ 5.2 | 4.6 $\pm$ 2.6   | 148.9 $\pm$ 40.1 | 67.2 $\pm$ 12.1        |



Table S13: Life times (in ps) of hydrogen bonds between protein residues in the K-channel and water molecules inside the channel. Note that the  $\text{H}_3\text{O}^+$  ion is not included as a water molecule. N/A indicates life times that are computed to be longer than the simulation time or have an error that is larger than the computed average value.

| Model | Y288              | T359              | K362               | S365            | H96            | E101                |
|-------|-------------------|-------------------|--------------------|-----------------|----------------|---------------------|
| 0000f | <2                | <2                | $19.9 \pm 11.1$    | $15.0 \pm 0.6$  | $6.3 \pm 0.3$  | $1689.2 \pm 687.1$  |
| 0000e | $54.4 \pm 26.7$   | <2                | $10.9 \pm 5.7$     | $37.8 \pm 3.7$  | $9.9 \pm 5.6$  | $3446.7 \pm 2298.3$ |
| 0000d | $33.2 \pm 16.9$   | $71.2 \pm 26.7$   | $31.9 \pm 6.7$     | $35.9 \pm 12.4$ | <2             | $1900.3 \pm 1151.4$ |
| 0000c | $101.9 \pm 37.1$  | $81.0 \pm 5.4$    | $22.2 \pm 2.4$     | $12.5 \pm 1.6$  | $6.8 \pm 0.7$  | N/A                 |
| 0000b | $25.8 \pm 7.5$    | $46.3 \pm 27.9$   | $19.2 \pm 8.9$     | <2              | $4.8 \pm 1.4$  | N/A                 |
| 0000a | $22.4 \pm 6.3$    | $30.7 \pm 13.8$   | $13.6 \pm 1.6$     | $16.7 \pm 1.2$  | <2             | N/A                 |
| 0011  | <2                | N/A               | $55.7 \pm 5.5$     | $14.9 \pm 5.1$  | <2             | $232.1 \pm 142.1$   |
| 0010  | $19.9 \pm 1.7$    | $66.5 \pm 18.9$   | N/A                | $16.2 \pm 2.5$  | $9.0 \pm 1.8$  | N/A                 |
| 0001  | <2                | $33.7 \pm 10.6$   | $13.7 \pm 1.3$     | $15.3 \pm 2.1$  | <2             | N/A                 |
| 0000  | $12.8 \pm 1.2$    | $26.8 \pm 0.4$    | $21.5 \pm 9.6$     | $15.9 \pm 1.3$  | $8.0 \pm 1.9$  | N/A                 |
| 0100f | <2                | <2                | $15.5 \pm 2.0$     | $33.3 \pm 21.8$ | $7.2 \pm 1.7$  | N/A                 |
| 0100e | $23.6 \pm 14.8$   | $91.0 \pm 23.9$   | $16.9 \pm 8.8$     | $61.3 \pm 26.8$ | $6.8 \pm 1.6$  | $1112.4 \pm 395.7$  |
| 0100d | $39.2 \pm 5.8$    | $110.4 \pm 15.9$  | <2                 | $40.9 \pm 35.8$ | $7.4 \pm 1.5$  | $1314.1 \pm 367.8$  |
| 0100c | $273.1 \pm 145.9$ | N/A               | <2                 | <2              | $6.4 \pm 1.2$  | N/A                 |
| 0100b | $12.4 \pm 0.5$    | $33.2 \pm 4.9$    | $10.6 \pm 0.9$     | <2              | <2             | $6034.1 \pm 4081.8$ |
| 0100a | $12.2 \pm 0.1$    | $39.0 \pm 9.1$    | $15.1 \pm 2.9$     | <2              | <2             | <2                  |
| 0111  | $50.6 \pm 38.8$   | N/A               | N/A                | $13.7 \pm 2.7$  | <2             | $211.2 \pm 43.1$    |
| 0110  | $26.5 \pm 7.0$    | $90.8 \pm 22.5$   | $1385.8 \pm 148.9$ | $28.5 \pm 4.5$  | $10.8 \pm 3.6$ | N/A                 |
| 0101  | <2                | $39.0 \pm 6.5$    | $27.8 \pm 12.4$    | $13.8 \pm 2.3$  | <2             | <2                  |
| 0100  | <2                | $53.1 \pm 30.8$   | $22.4 \pm 8.7$     | <2              | <2             | <2                  |
| 1000f | <2                | <2                | $13.3 \pm 3.2$     | $15.1 \pm 0.9$  | $7.8 \pm 1.9$  | $1251.5 \pm 494.6$  |
| 1000e | $50.2 \pm 44.6$   | $62.0 \pm 42.4$   | $25.3 \pm 16.8$    | $32.6 \pm 14.0$ | $8.3 \pm 1.2$  | N/A                 |
| 1000d | $25.1 \pm 9.7$    | $93.2 \pm 27.7$   | $30.2 \pm 26.2$    | $21.8 \pm 6.8$  | $8.7 \pm 2.7$  | N/A                 |
| 1000c | $175.9 \pm 134.5$ | $141.4 \pm 16.3$  | $31.3 \pm 10.8$    | $15.0 \pm 2.7$  | $7.7 \pm 1.1$  | N/A                 |
| 1000b | $28.4 \pm 2.8$    | $63.0 \pm 23.7$   | <2                 | <2              | <2             | N/A                 |
| 1000a | <2                | $27.3 \pm 9.7$    | $23.3 \pm 13.5$    | $16.7 \pm 0.7$  | <2             | $115.5 \pm 34.1$    |
| 1011  | <2                | $270.9 \pm 119.7$ | $437.0 \pm 40.8$   | $11.7 \pm 4.0$  | <2             | <2                  |
| 1010  | <2                | N/A               | $1339.5 \pm 349.8$ | $41.0 \pm 22.9$ | $8.2 \pm 0.9$  | N/A                 |
| 1001  | <2                | $67.9 \pm 56.8$   | <2                 | $17.5 \pm 0.7$  | <2             | $204.3 \pm 128.8$   |
| 1000  | $11.1 \pm 3.3$    | $26.8 \pm 3.8$    | $23.7 \pm 7.6$     | $19.1 \pm 5.0$  | $10.6 \pm 5.1$ | N/A                 |
| 1100f | N/A               | <2                | $22.7 \pm 10.5$    | $13.3 \pm 1.6$  | $9.8 \pm 1.8$  | N/A                 |
| 1100e | $149.5 \pm 133.3$ | $96.6 \pm 53.1$   | $16.5 \pm 7.9$     | $28.5 \pm 1.7$  | $7.9 \pm 3.8$  | N/A                 |
| 1100d | $591.4 \pm 117.0$ | $116.9 \pm 25.4$  | <2                 | $35.2 \pm 32.7$ | $11.1 \pm 4.2$ | N/A                 |
| 1100c | $86.5 \pm 61.4$   | $67.6 \pm 31.8$   | $32.6 \pm 7.6$     | $19.6 \pm 12.9$ | $7.6 \pm 2.0$  | N/A                 |
| 1100b | $55.3 \pm 37.2$   | $51.6 \pm 15.1$   | $12.1 \pm 0.6$     | <2              | <2             | N/A                 |
| 1100a | $27.8 \pm 17.6$   | $37.5 \pm 9.5$    | $12.9 \pm 1.5$     | N/A             | <2             | $331.2 \pm 219.3$   |
| 1111  | $35.5 \pm 30.6$   | $126.7 \pm 21.5$  | N/A                | $8.7 \pm 2.4$   | $8.2 \pm 4.5$  | $88.3 \pm 47.3$     |
| 1110  | $80.1 \pm 34.7$   | N/A               | N/A                | $41.9 \pm 17.0$ | $6.0 \pm 1.7$  | N/A                 |
| 1101  | $15.4 \pm 2.6$    | $73.5 \pm 44.7$   | <2                 | $16.1 \pm 3.0$  | <2             | $193.8 \pm 159.4$   |
| 1100  | $13.2 \pm 0.2$    | $30.2 \pm 6.3$    | <2                 | $17.8 \pm 0.9$  | $10.0 \pm 3.5$ | N/A                 |

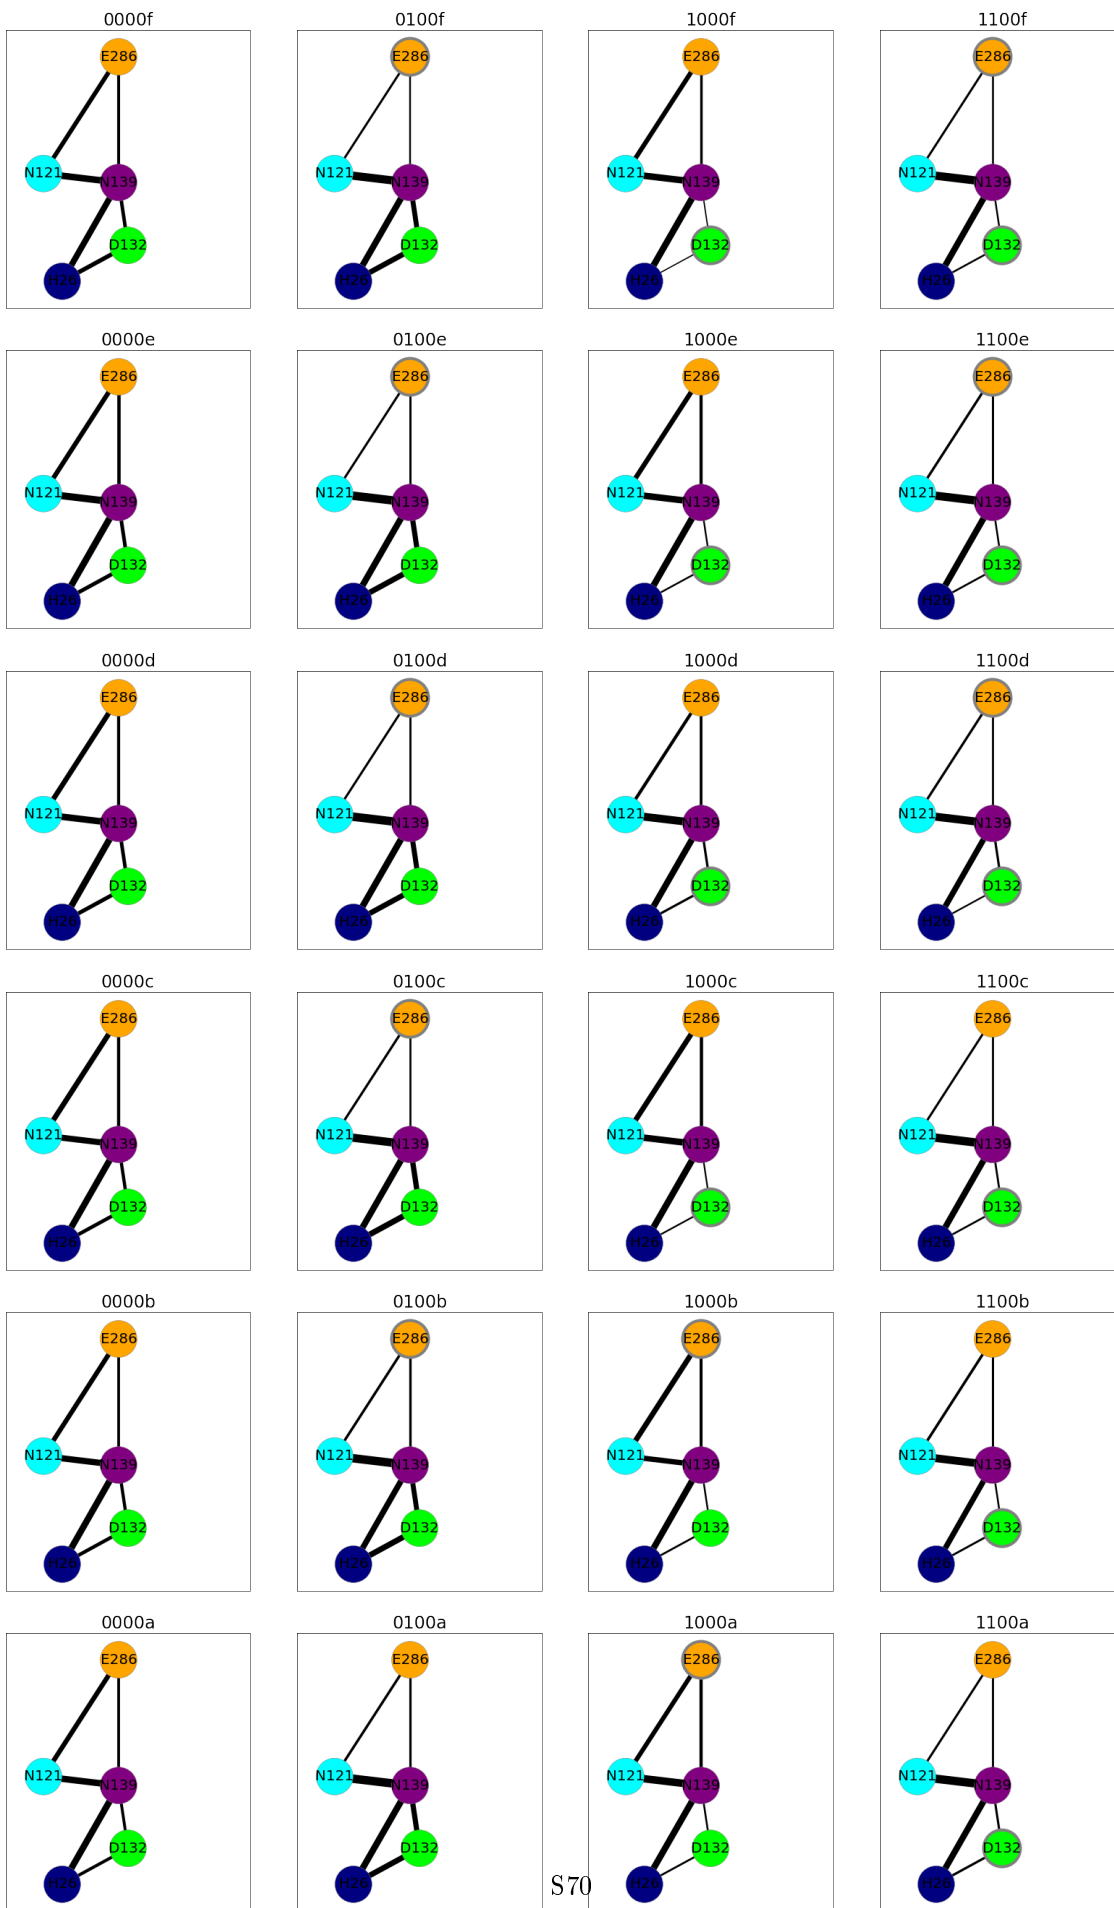

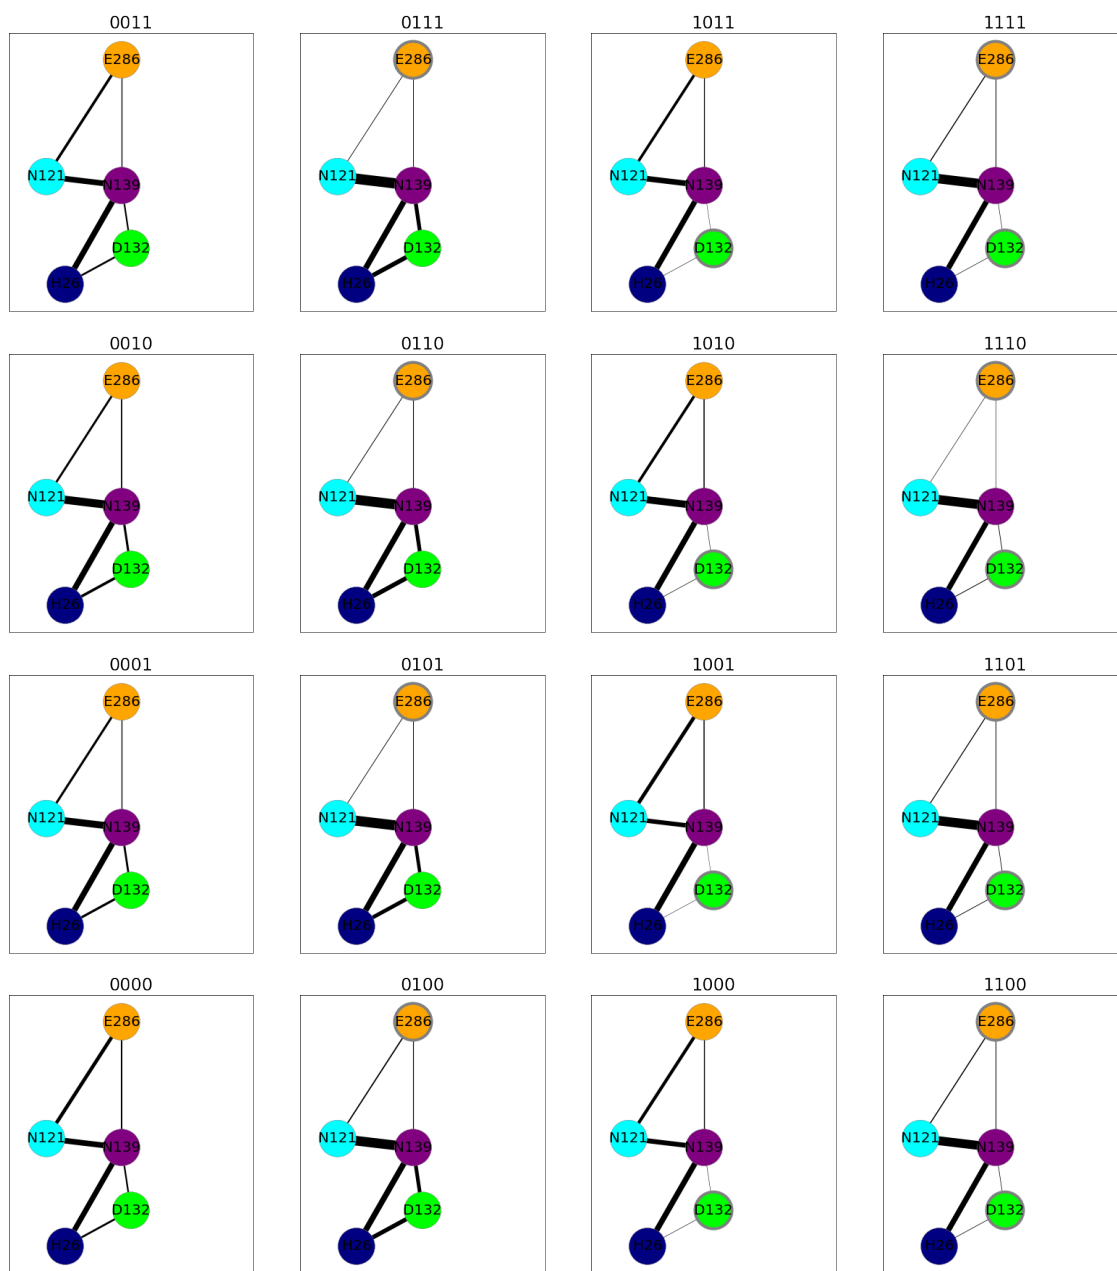

Figure S46: Hydrogen bonded connections between important protein residues (represented by coloured nodes: H26 dark blue, N121 cyan, D132 lime, N139 purple, E286 orange) in the D-channel of CcO. Residues with an excess proton are marked by a grey circle around the symbols representing the respective residues. The thickness of the lines indicates the probability of a hydrogen-bonded connection. Only connections with at least 1% occurrence are shown for clarity.

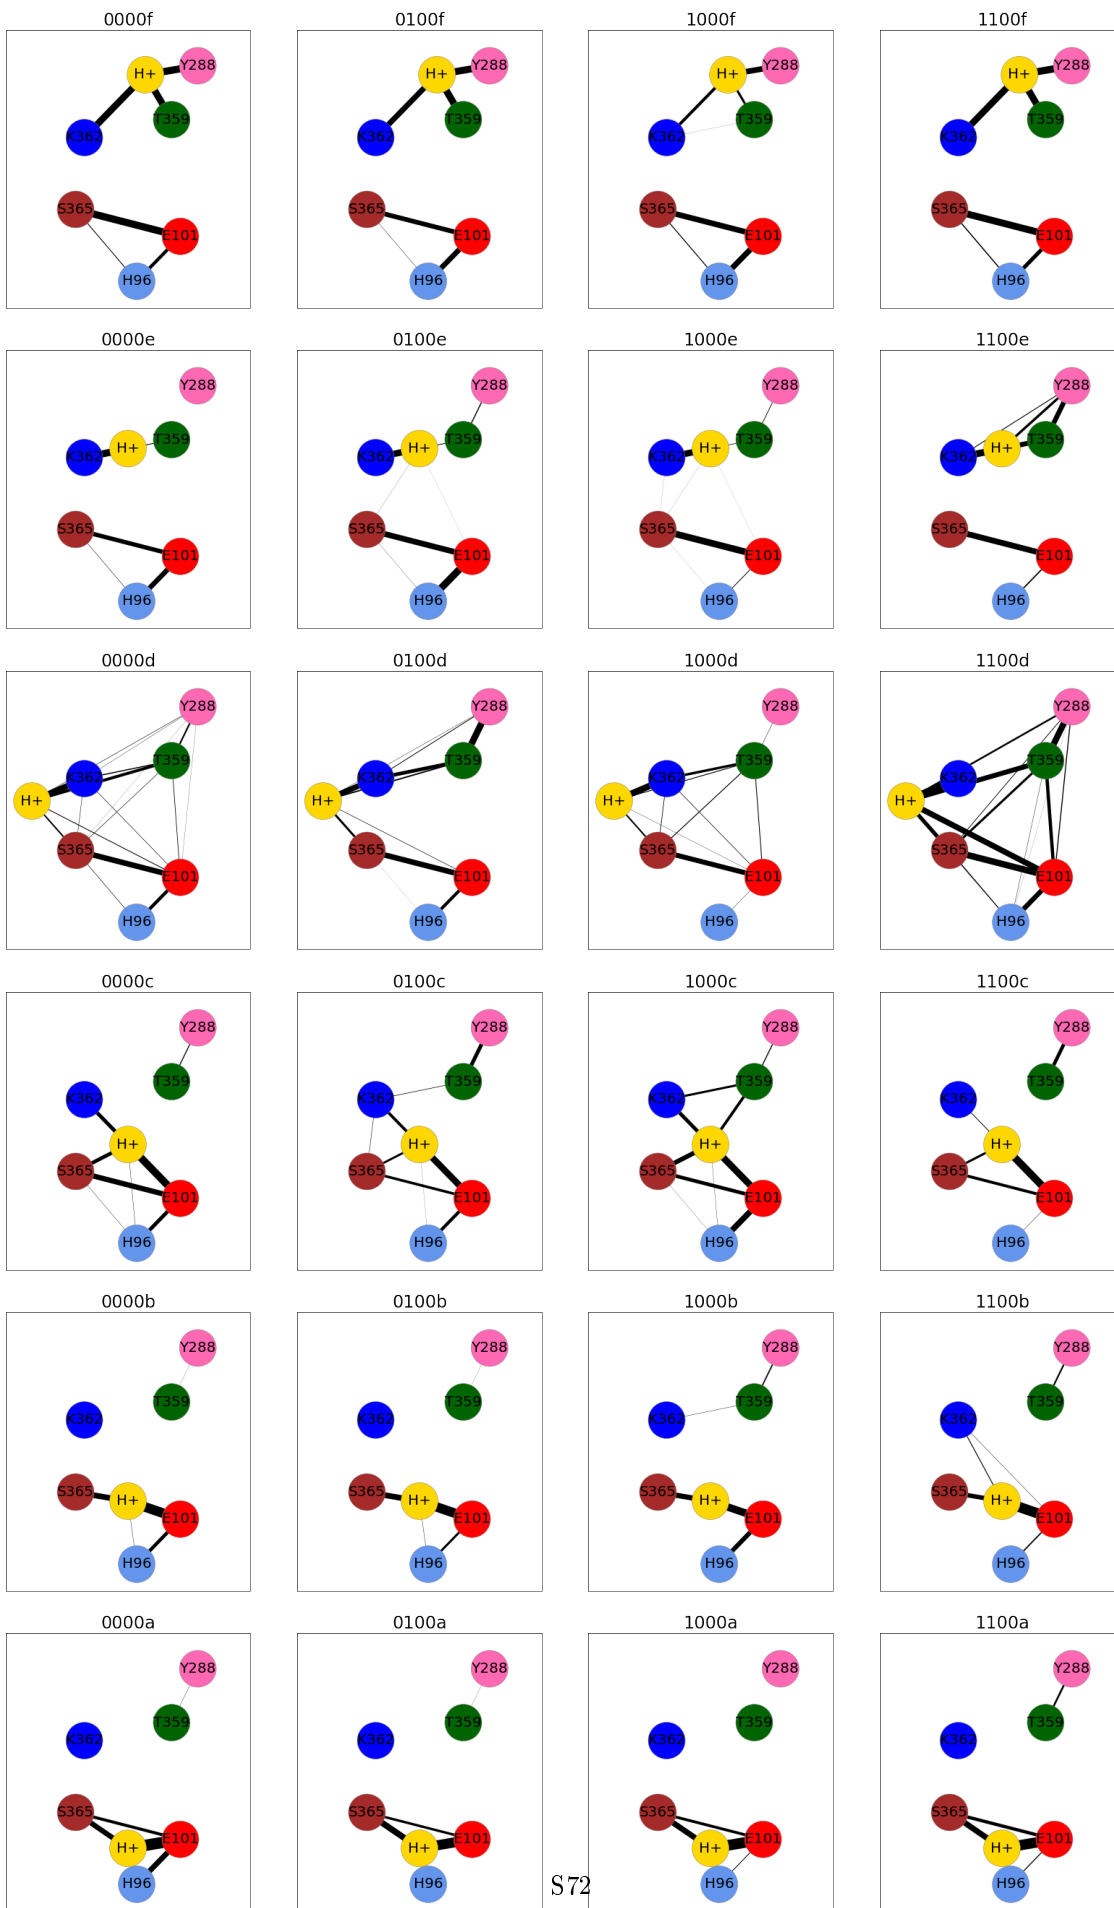

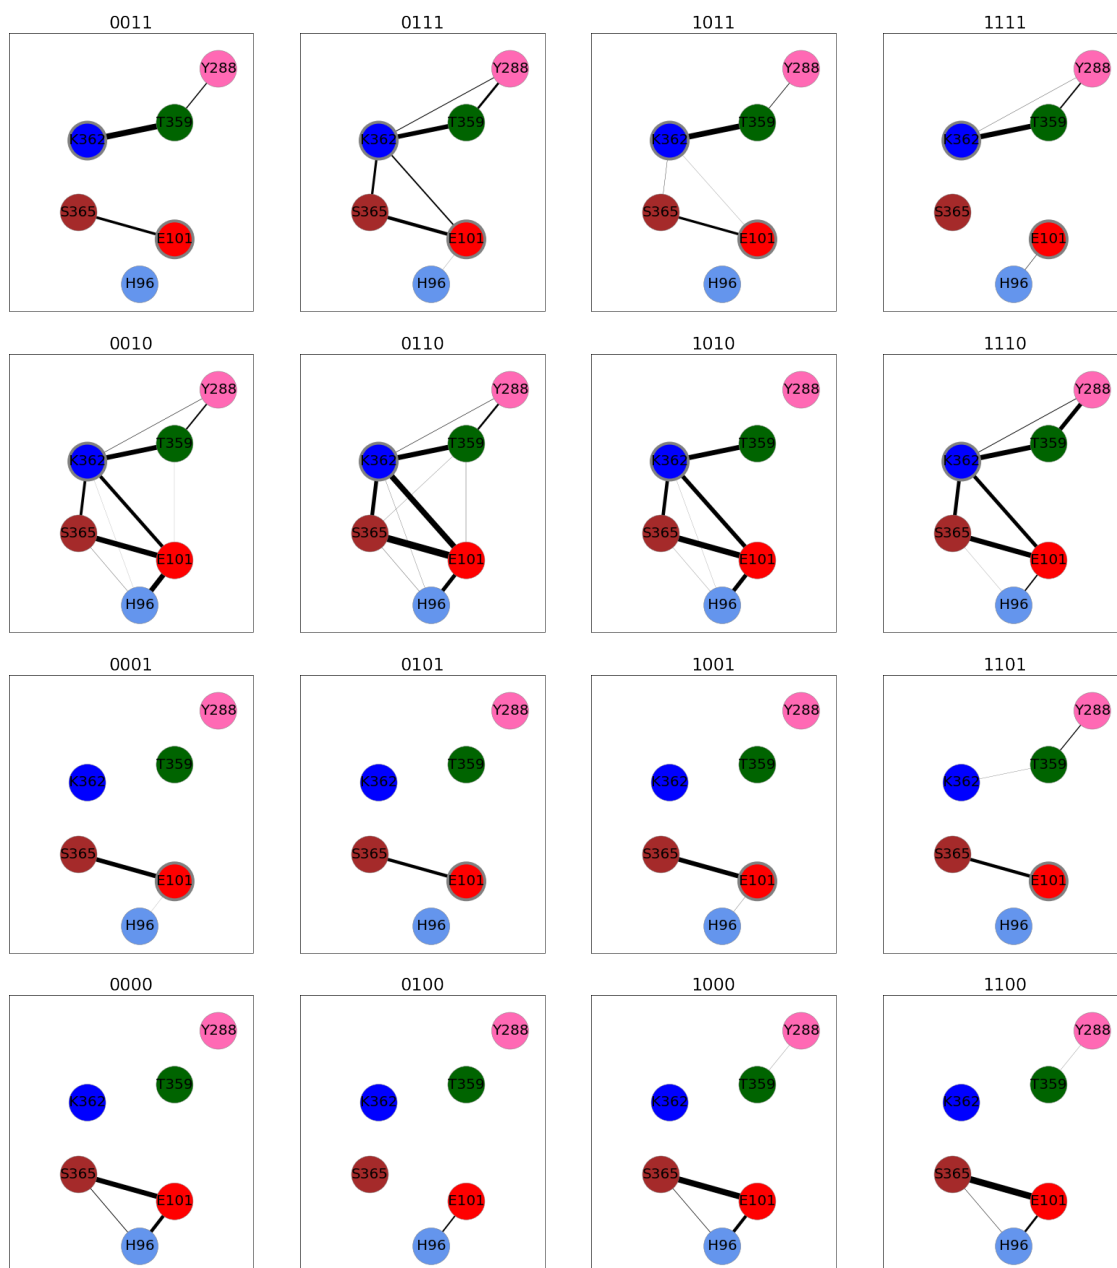

Figure S47: Hydrogen bonded connections between important protein residues (represented by coloured nodes: Y288 pink, T359 dark green, K362 blue, S365 brown, H96 light blue, E101 red) in the K-channel of CcO. Residues with an excess proton are marked by a grey circle around the symbols representing the respective residues. The thickness of the lines indicates the probability of a hydrogen-bonded connection. Only connections with at least 1% occurrence are shown for clarity.
